# Supplementary material for: Significant variation in the performance of DNA methylation predictors across data preprocessing and normalization strategies
Source: PubMed Central journal article supplement (PMC9590227; doi:10.1186/s13059-022-02793-w), 2022-10-24

# All Predictors

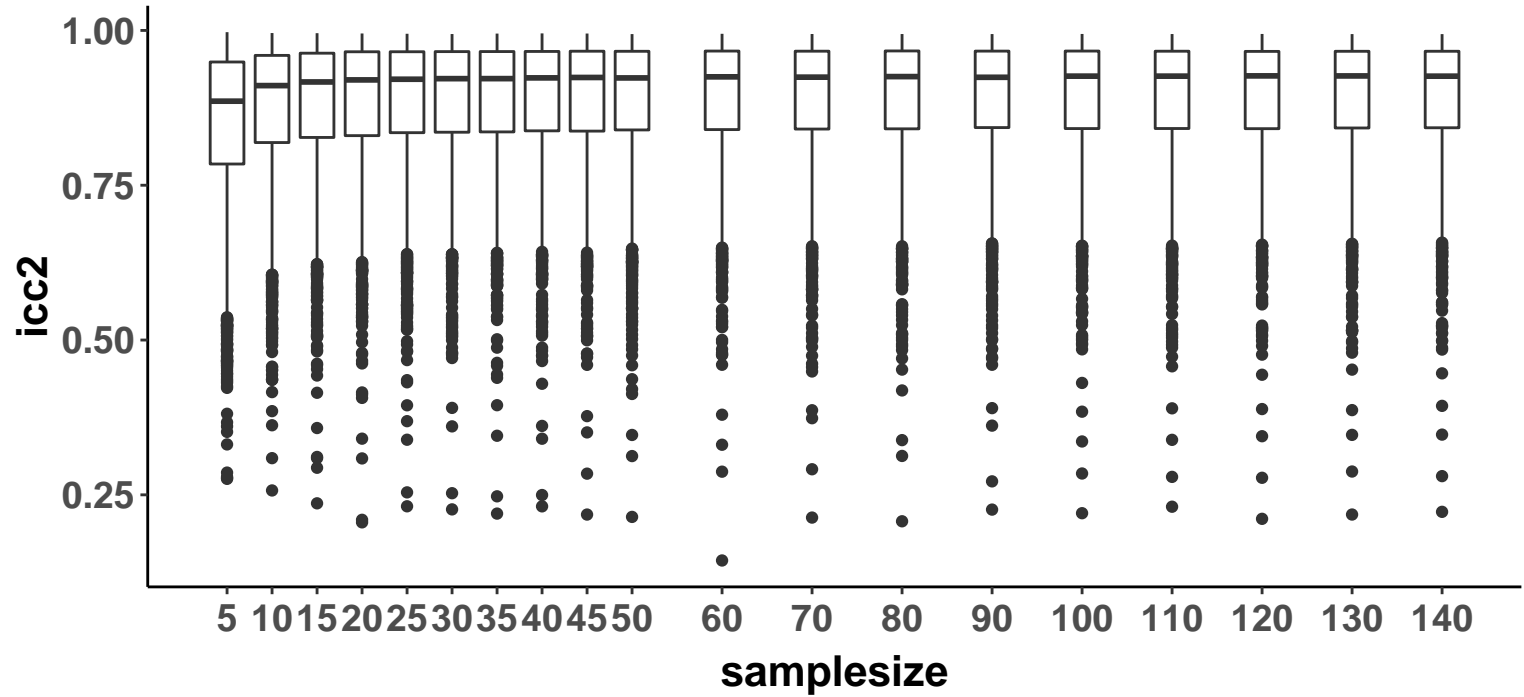

# HorvathAge

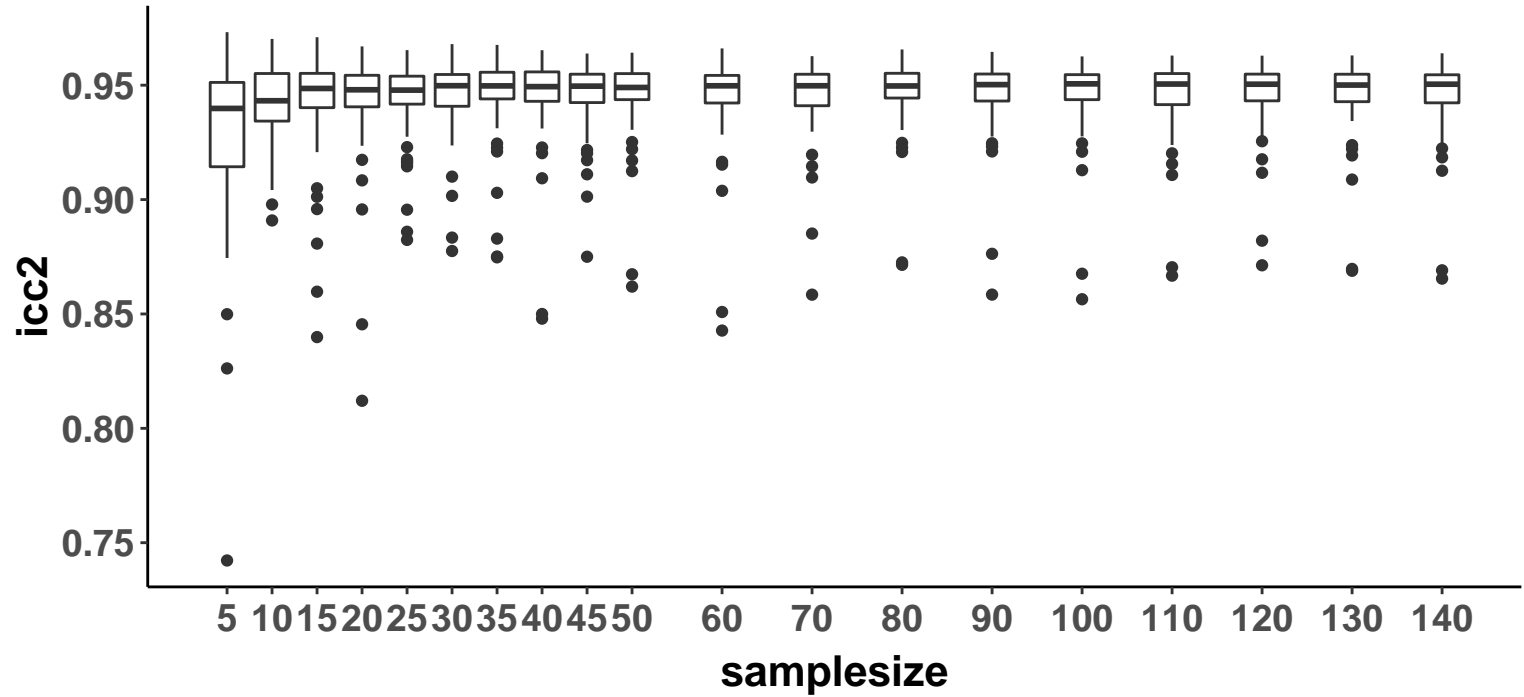

# HannumAge

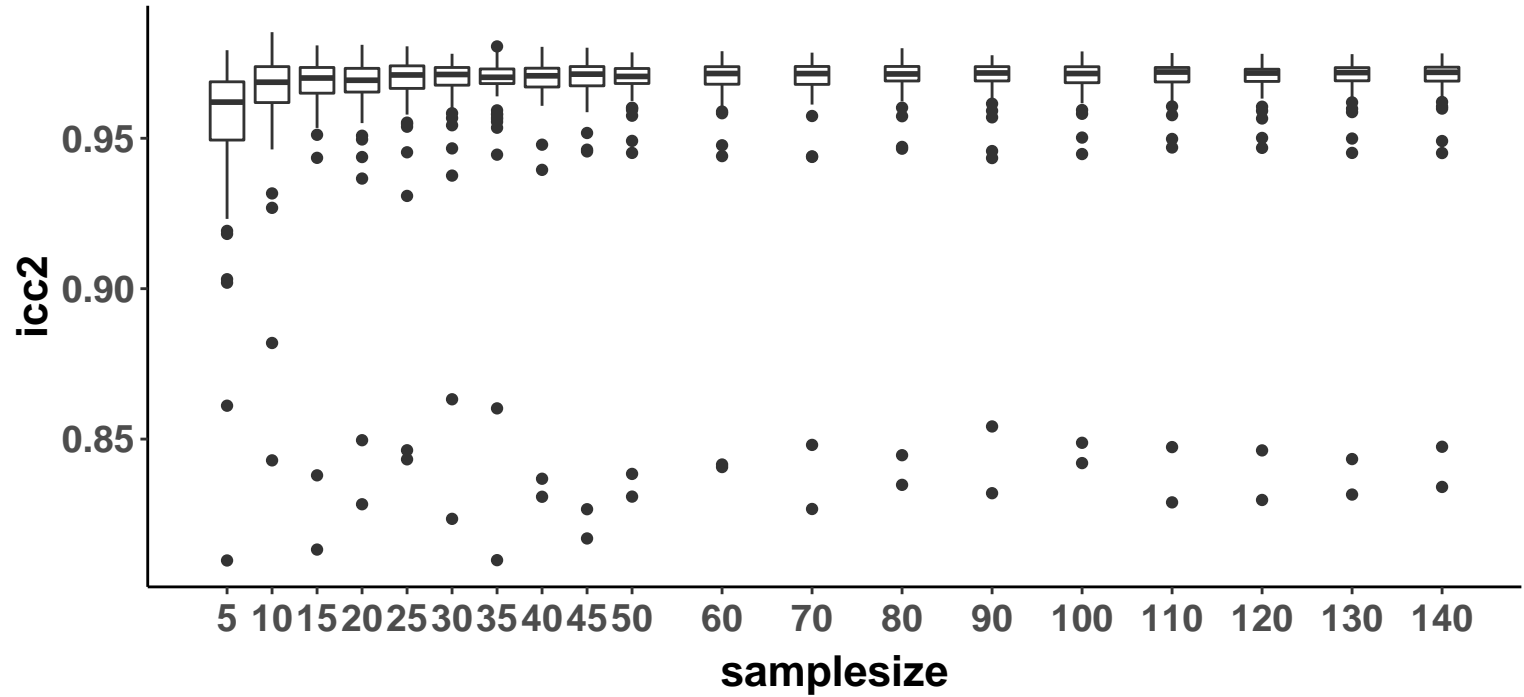

# PhenoAge

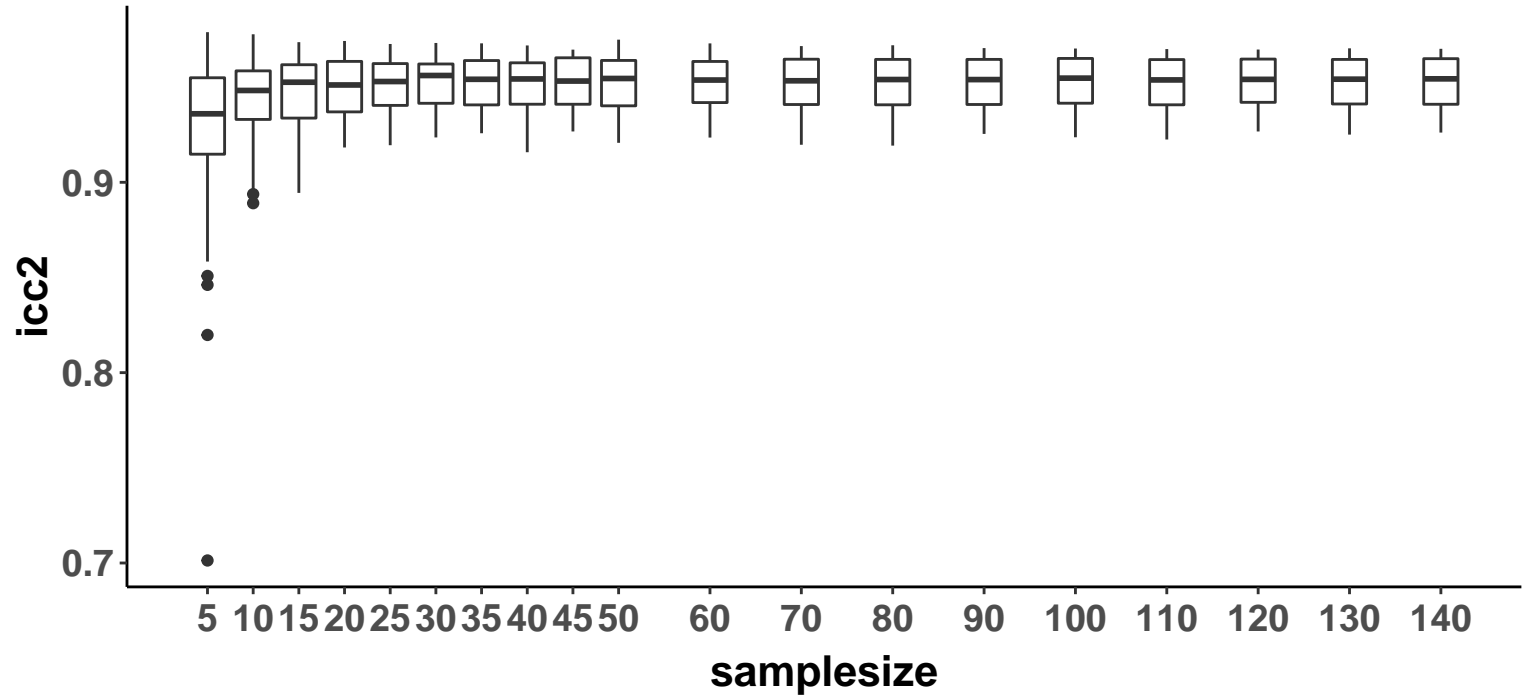

# SkinBloodAge

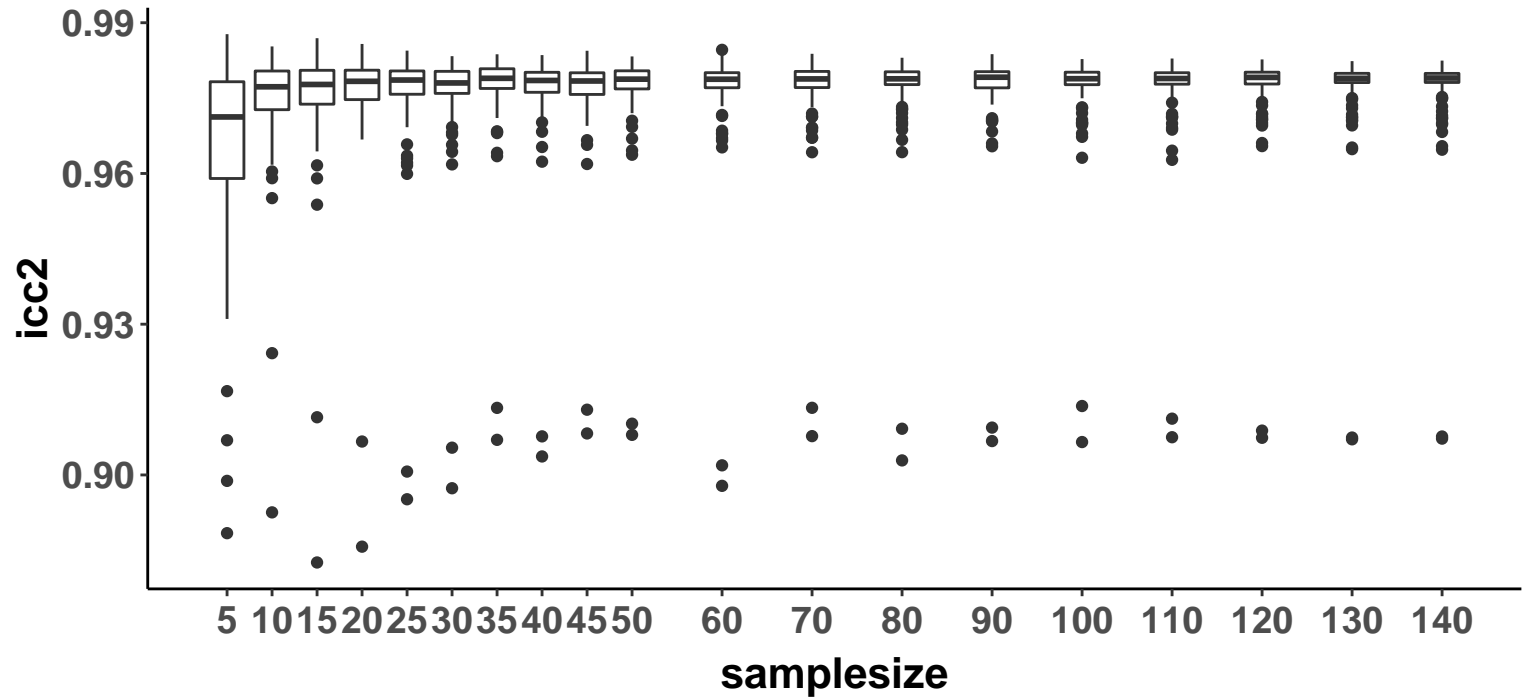

# ZhangAge

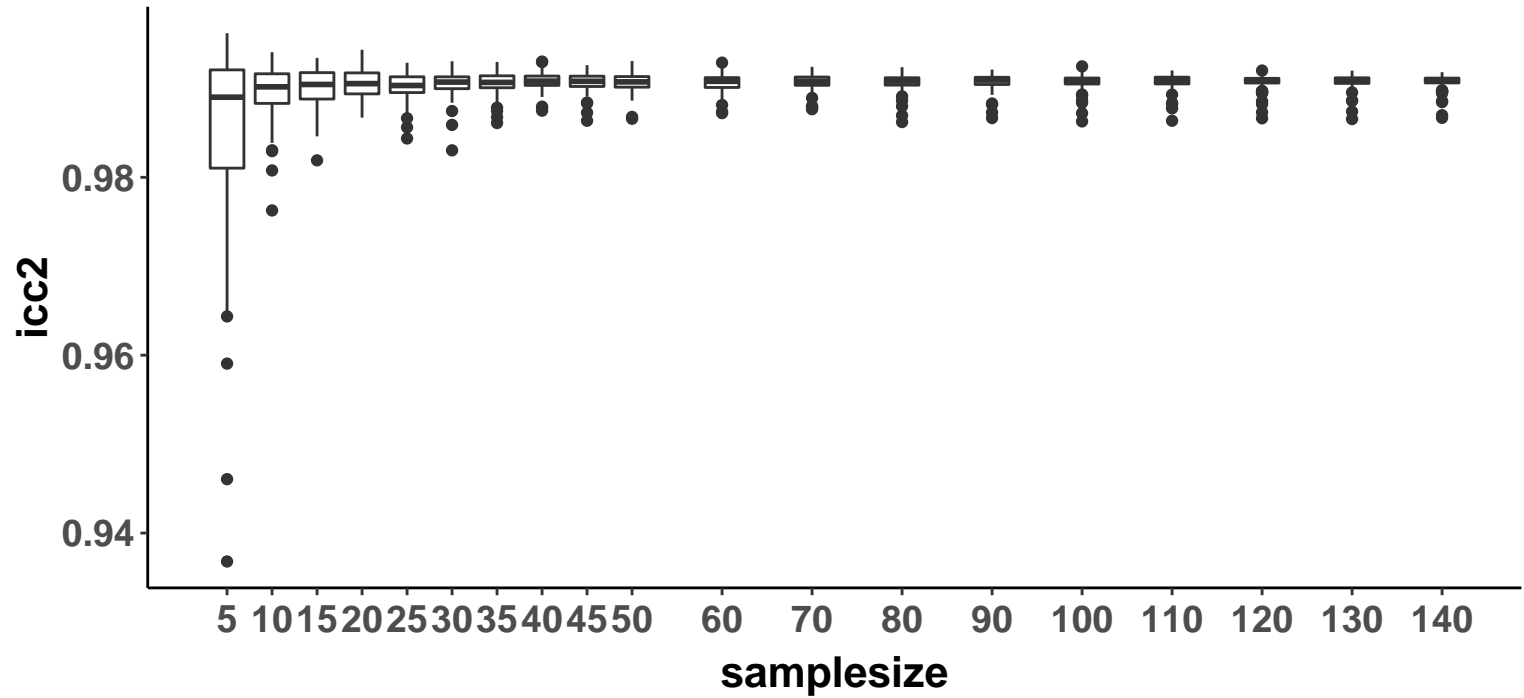

# MiAge

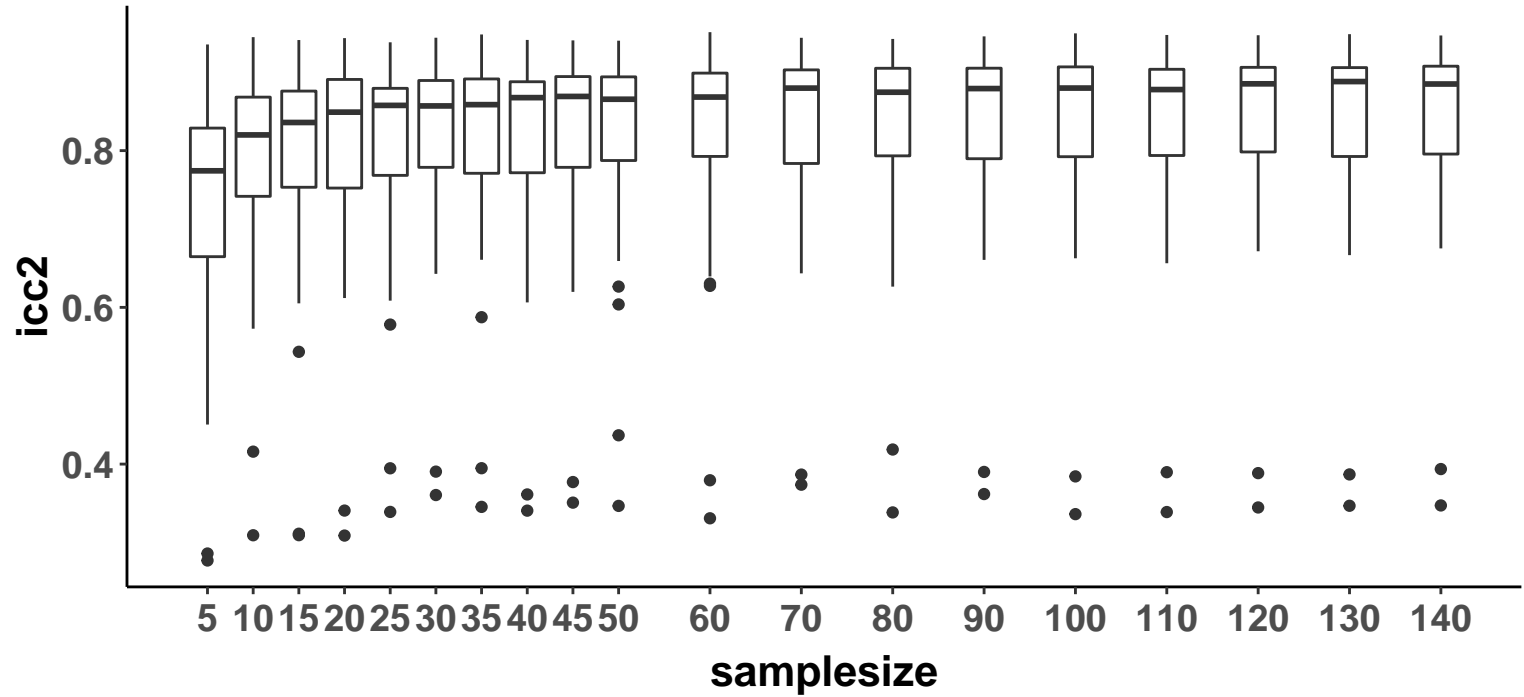

# epiTOC

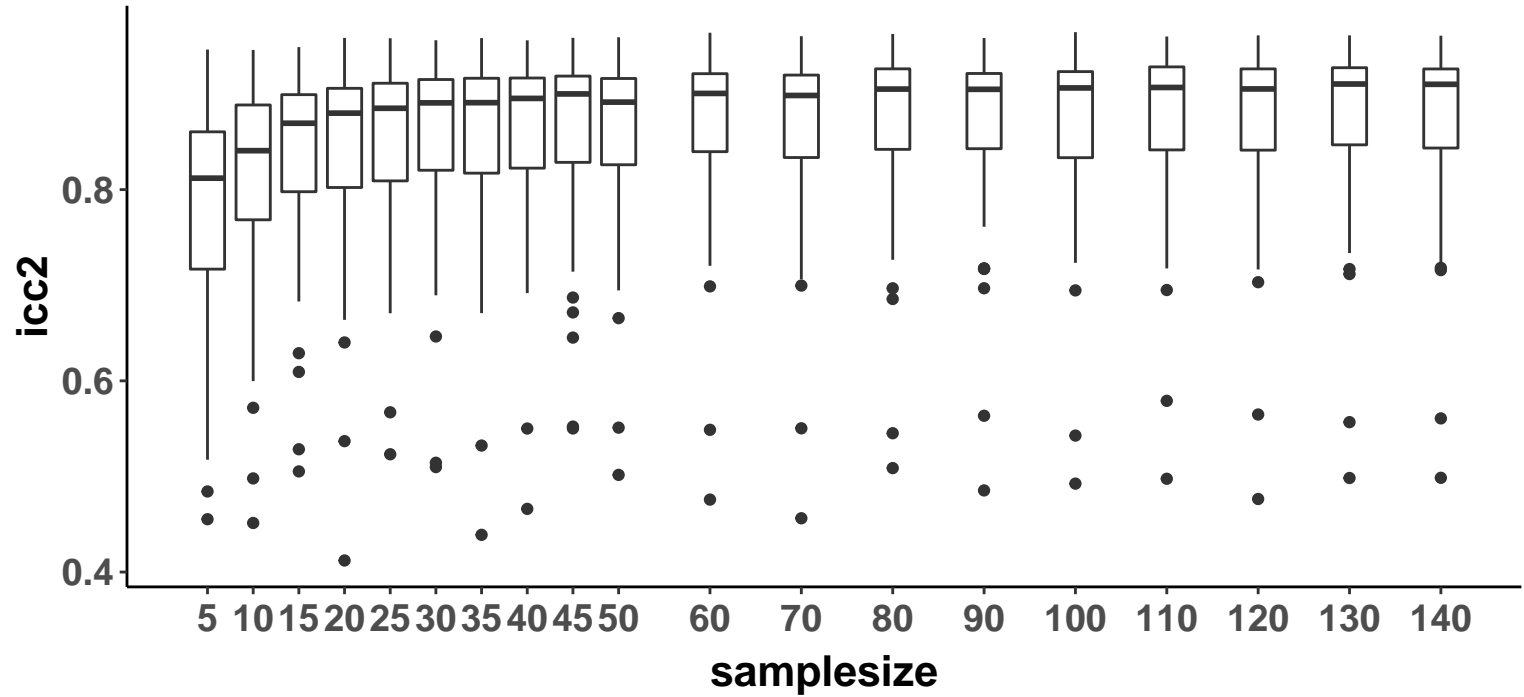



# ZhangMortality

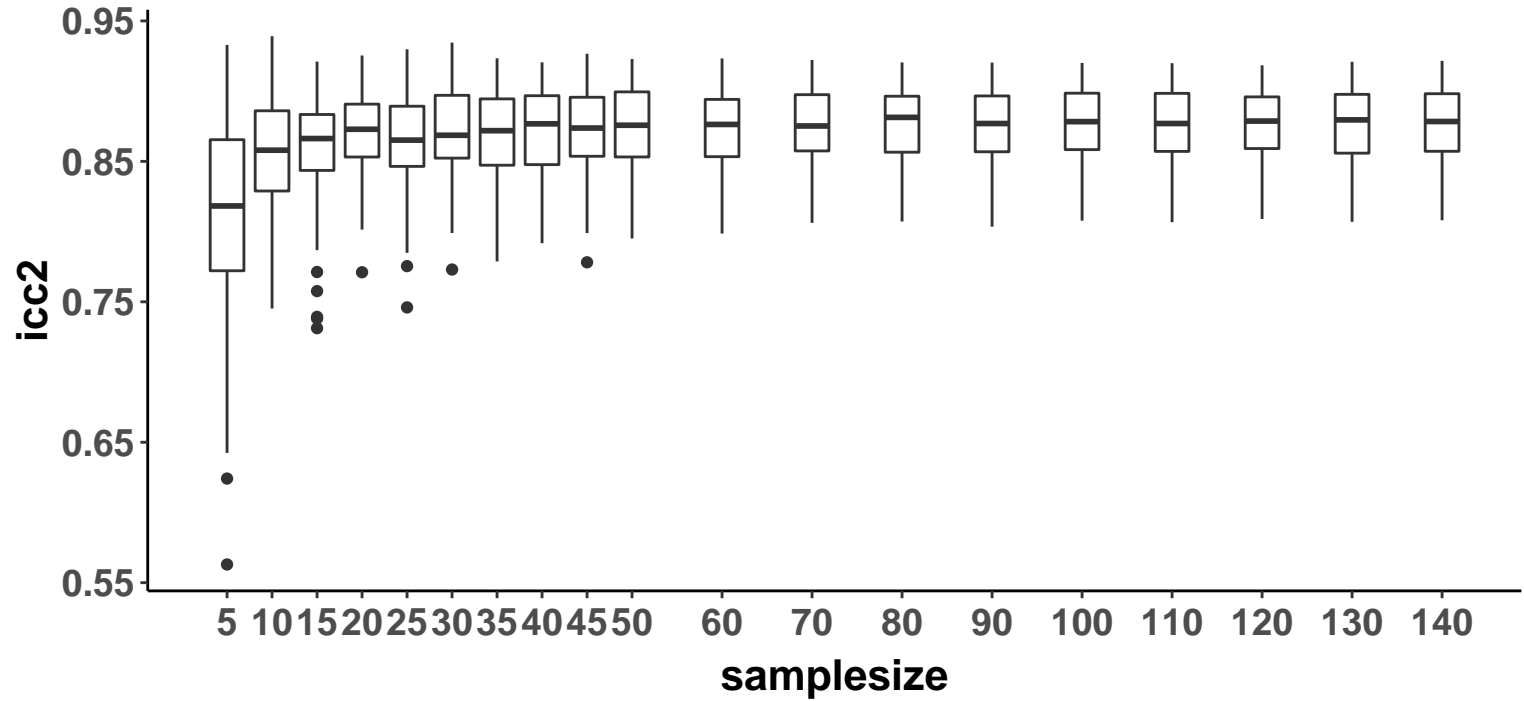

# DNAmTL

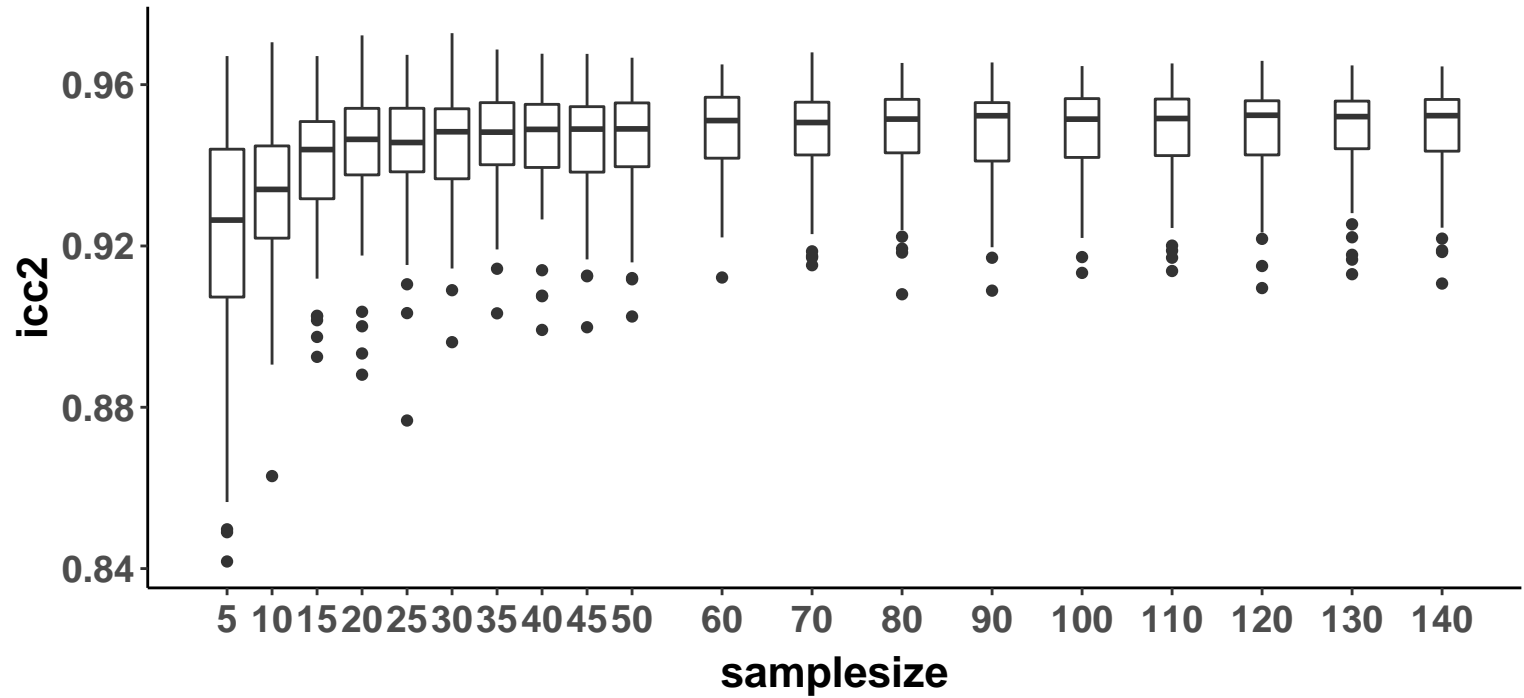

# VidalBraloAge

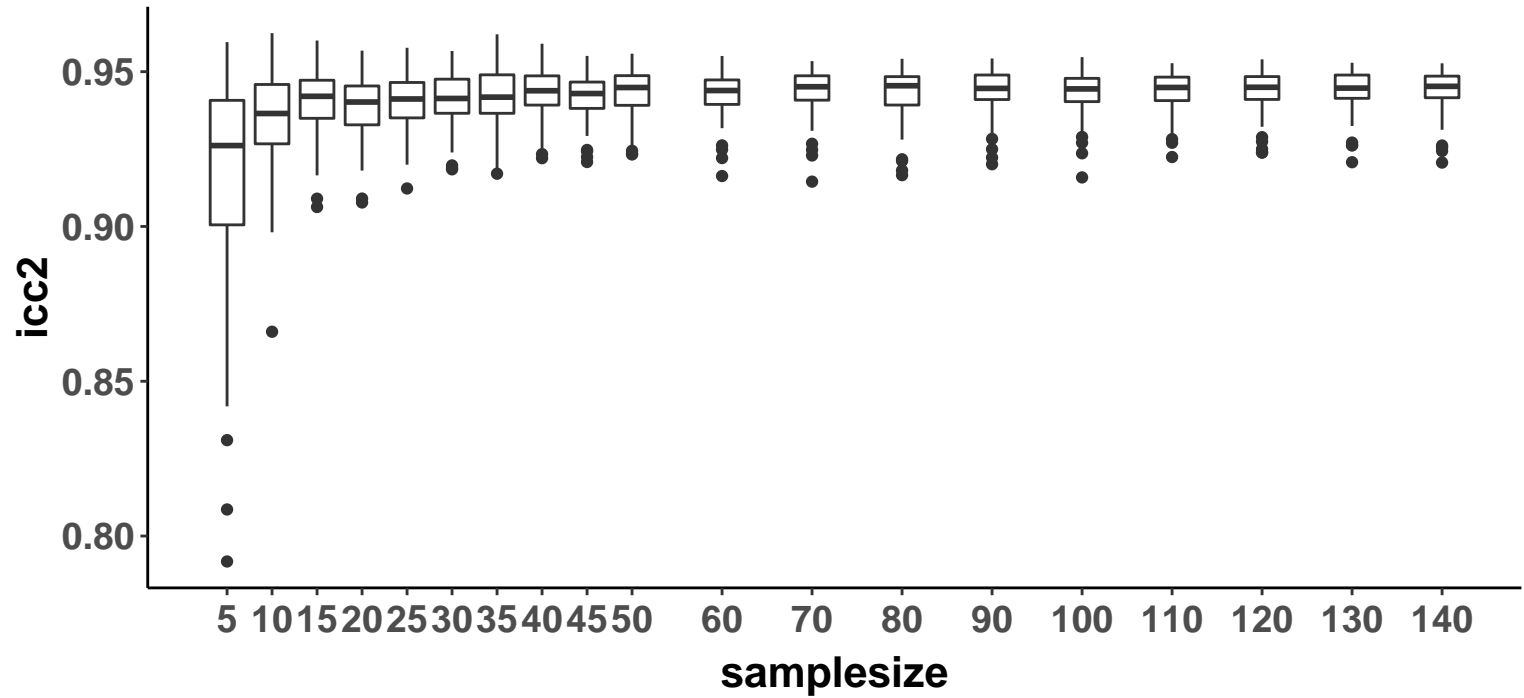

# LinAge

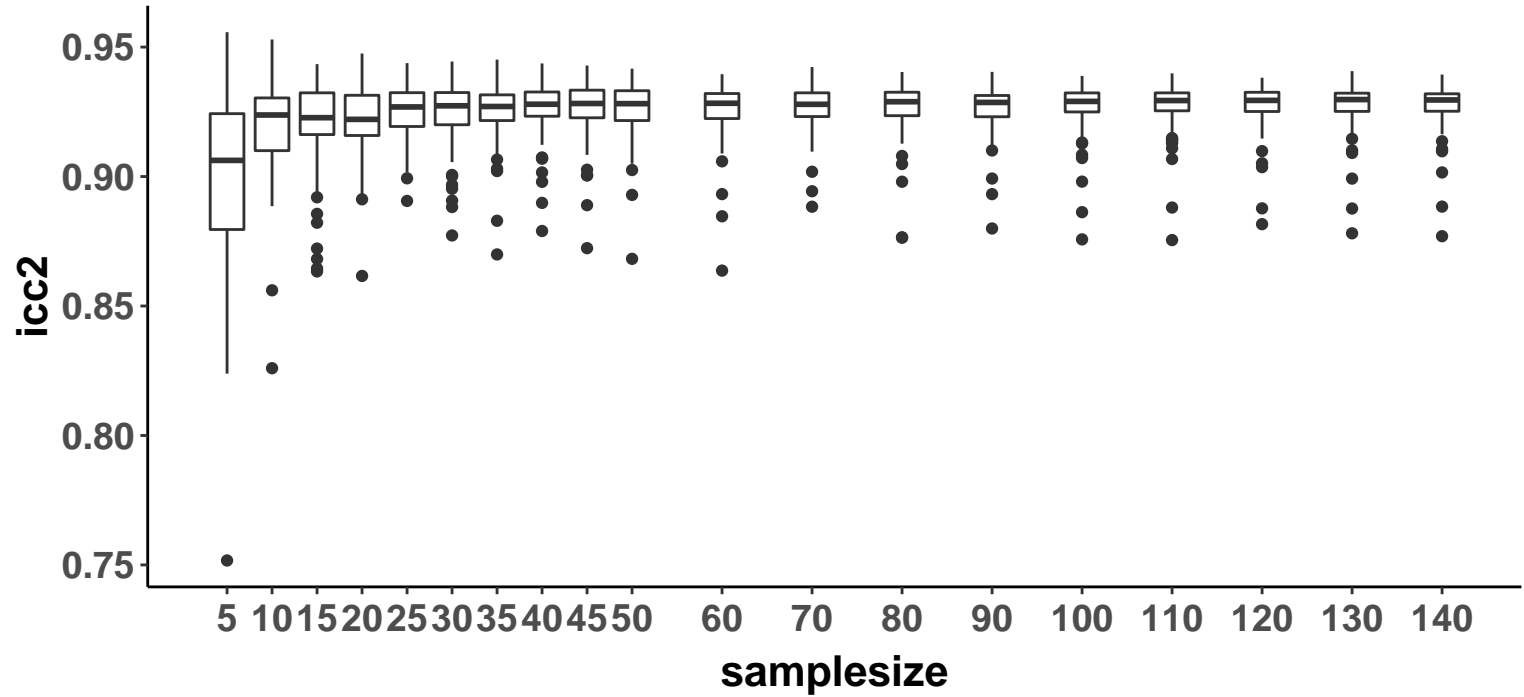

# WeidnerAge

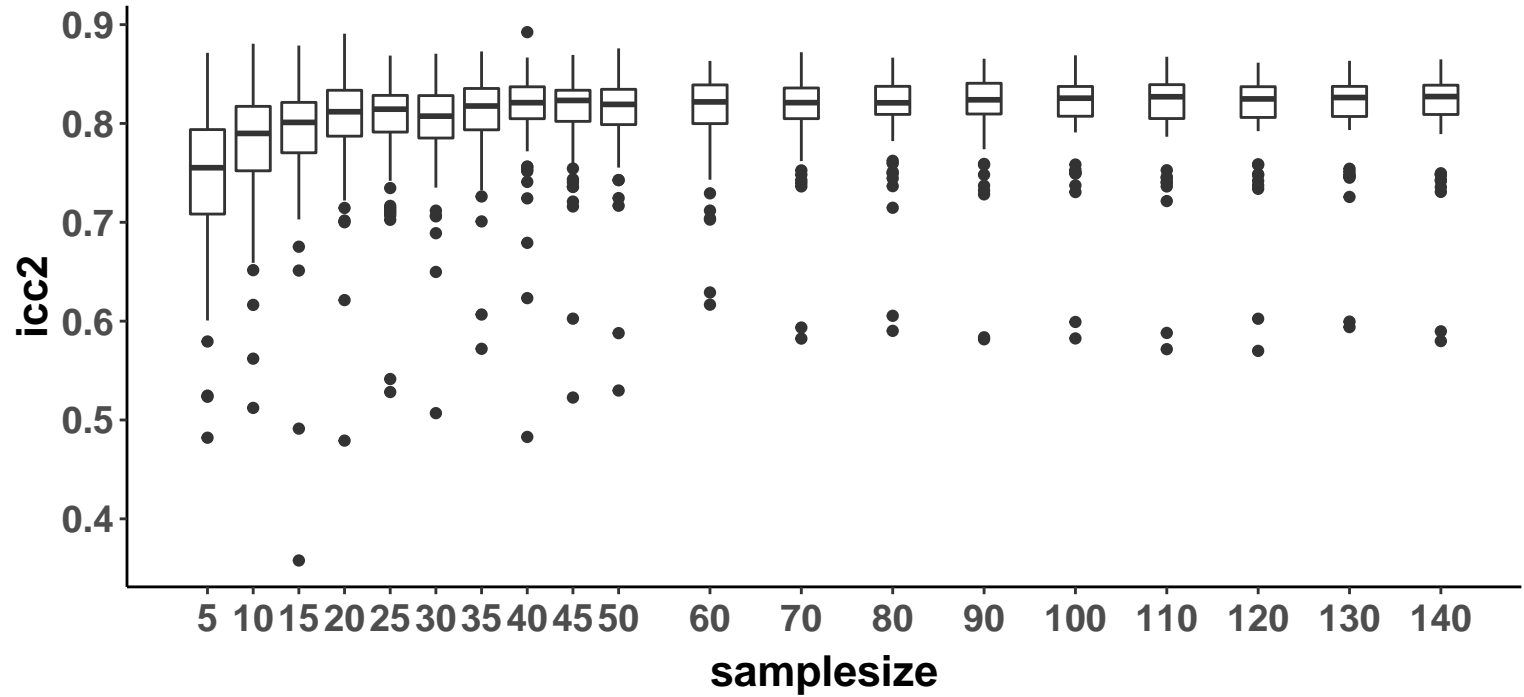

# Alcohol

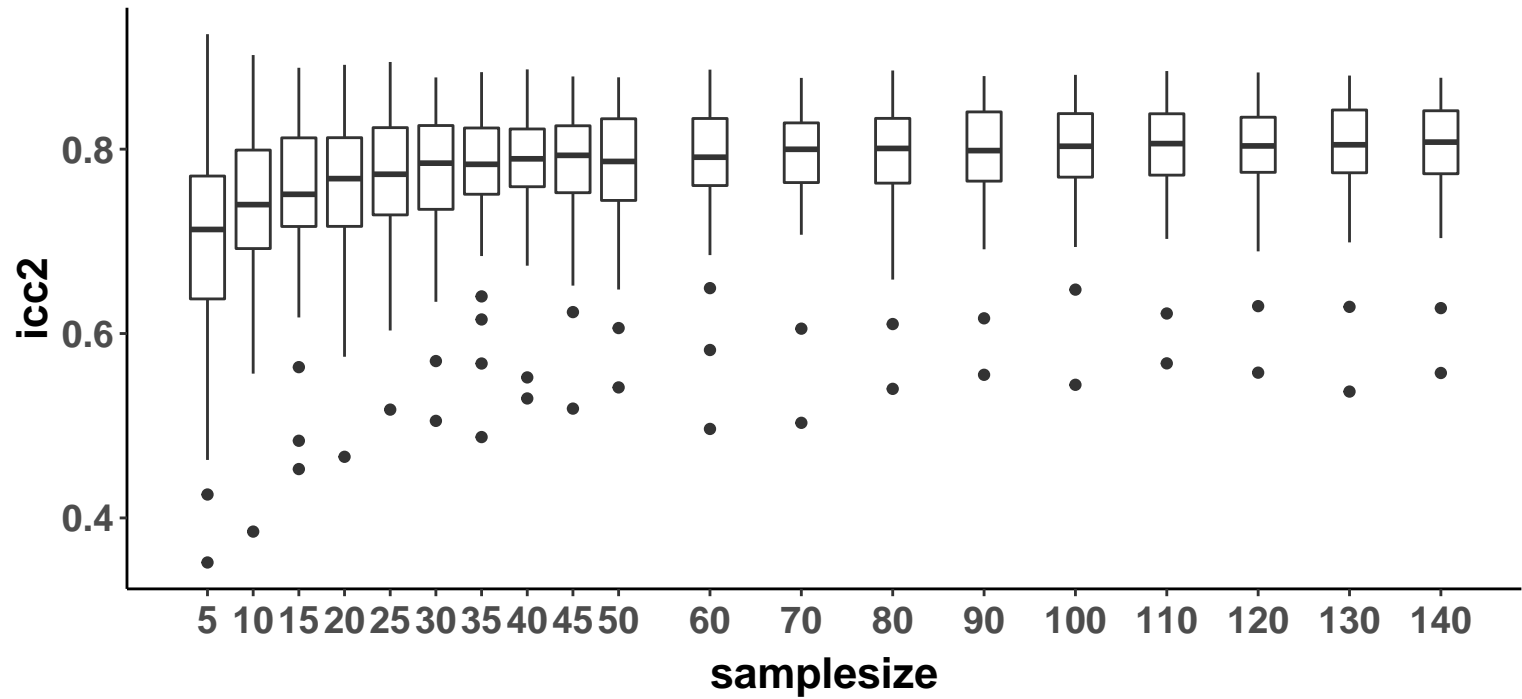

# BMI

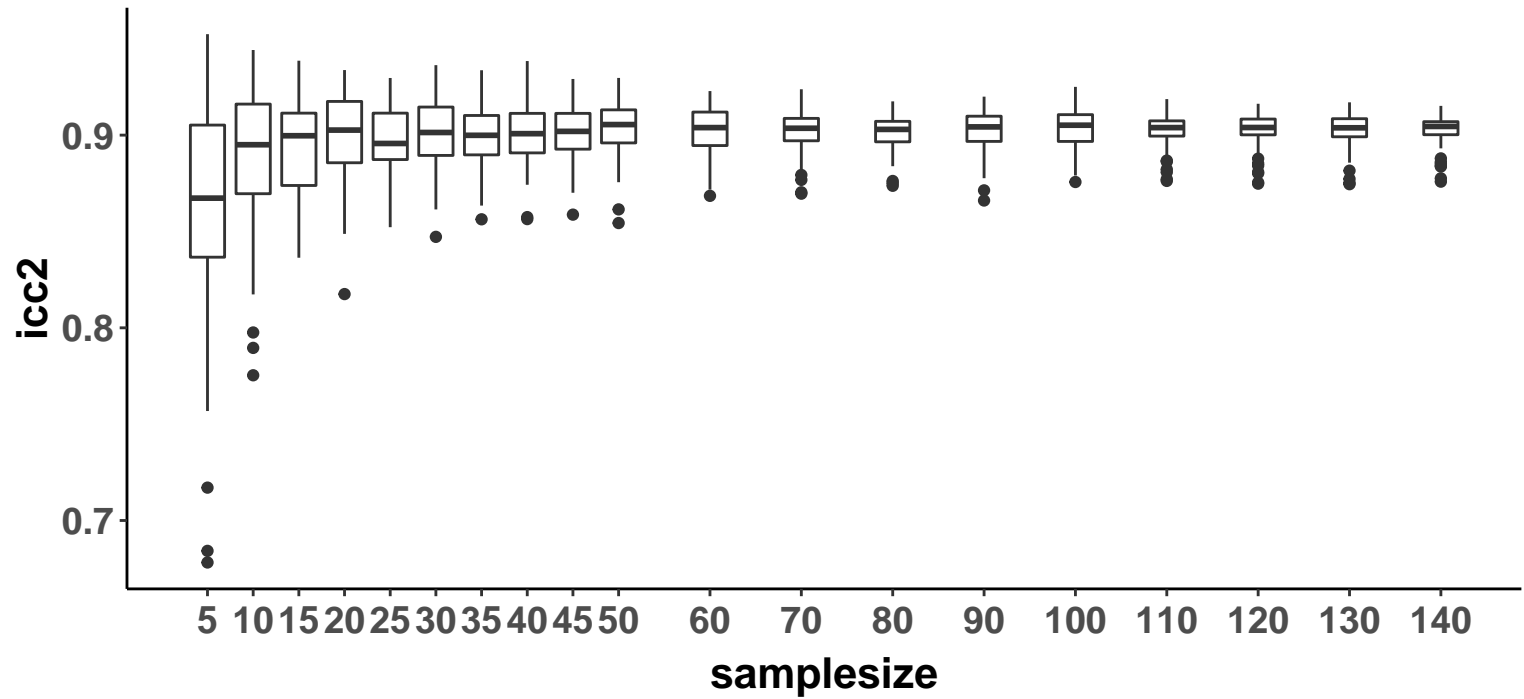

# BodyFat

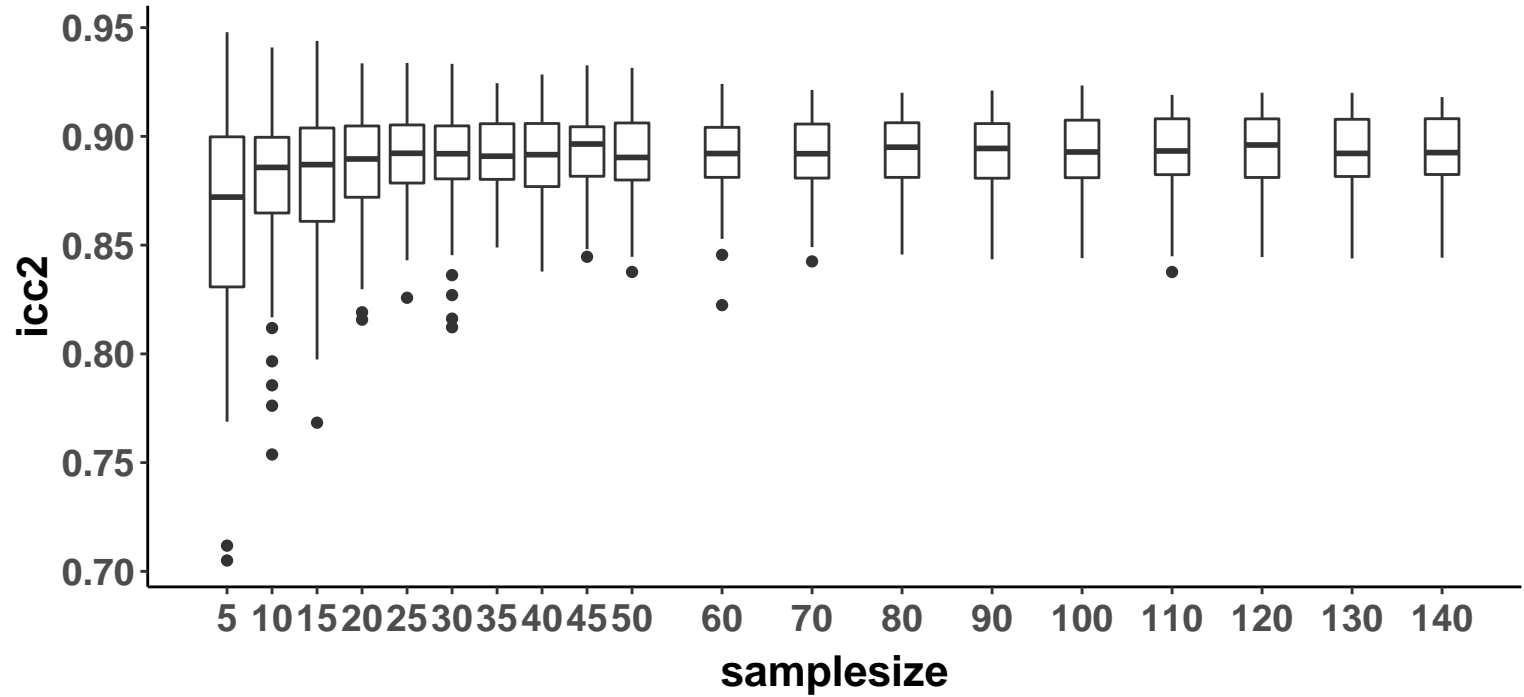



# Cholesterol

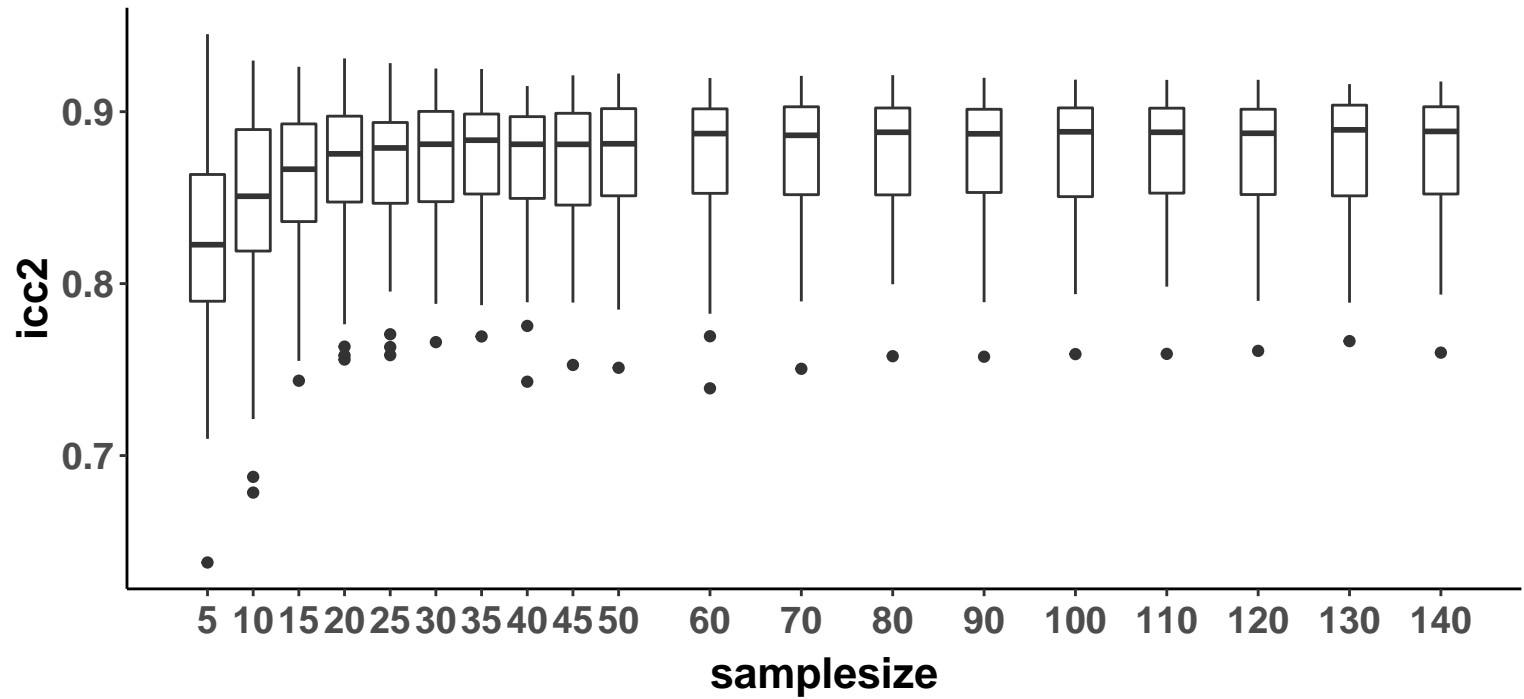

# Education

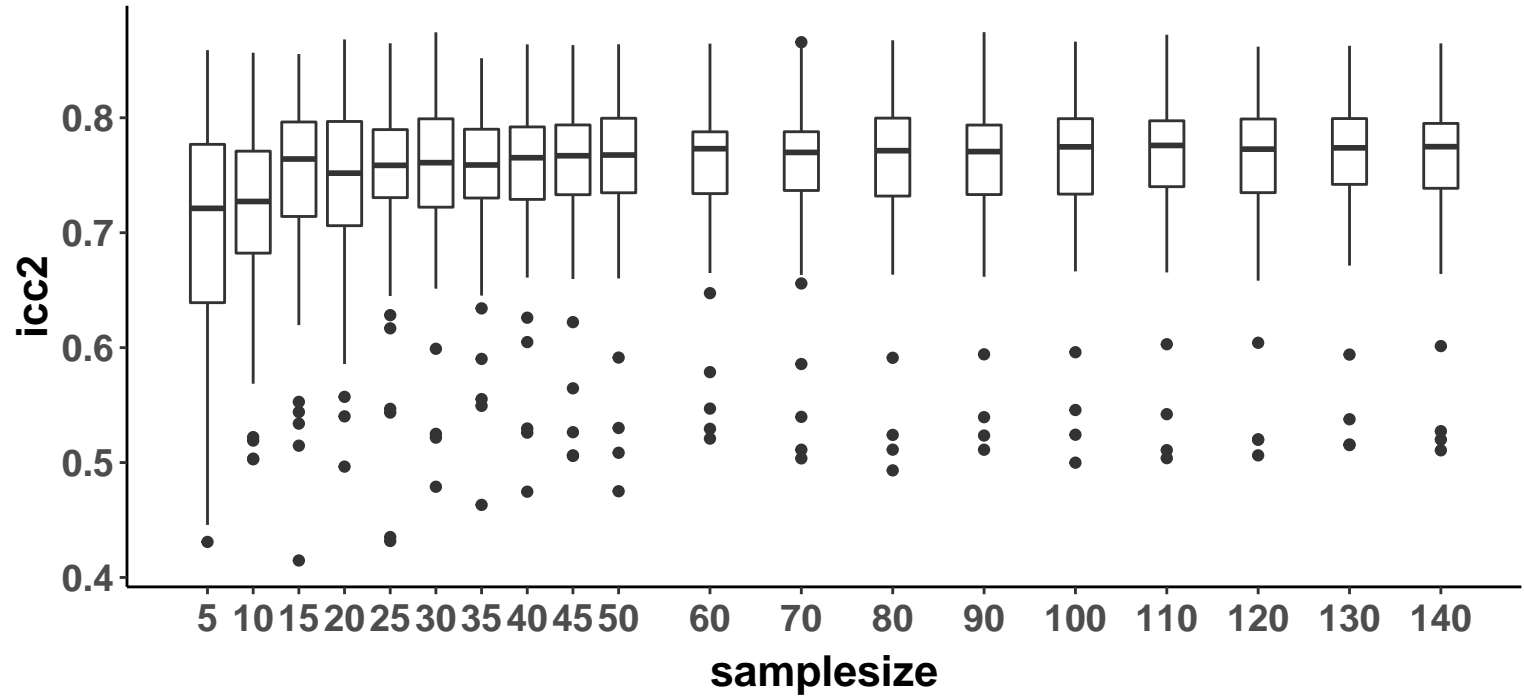

# HDL

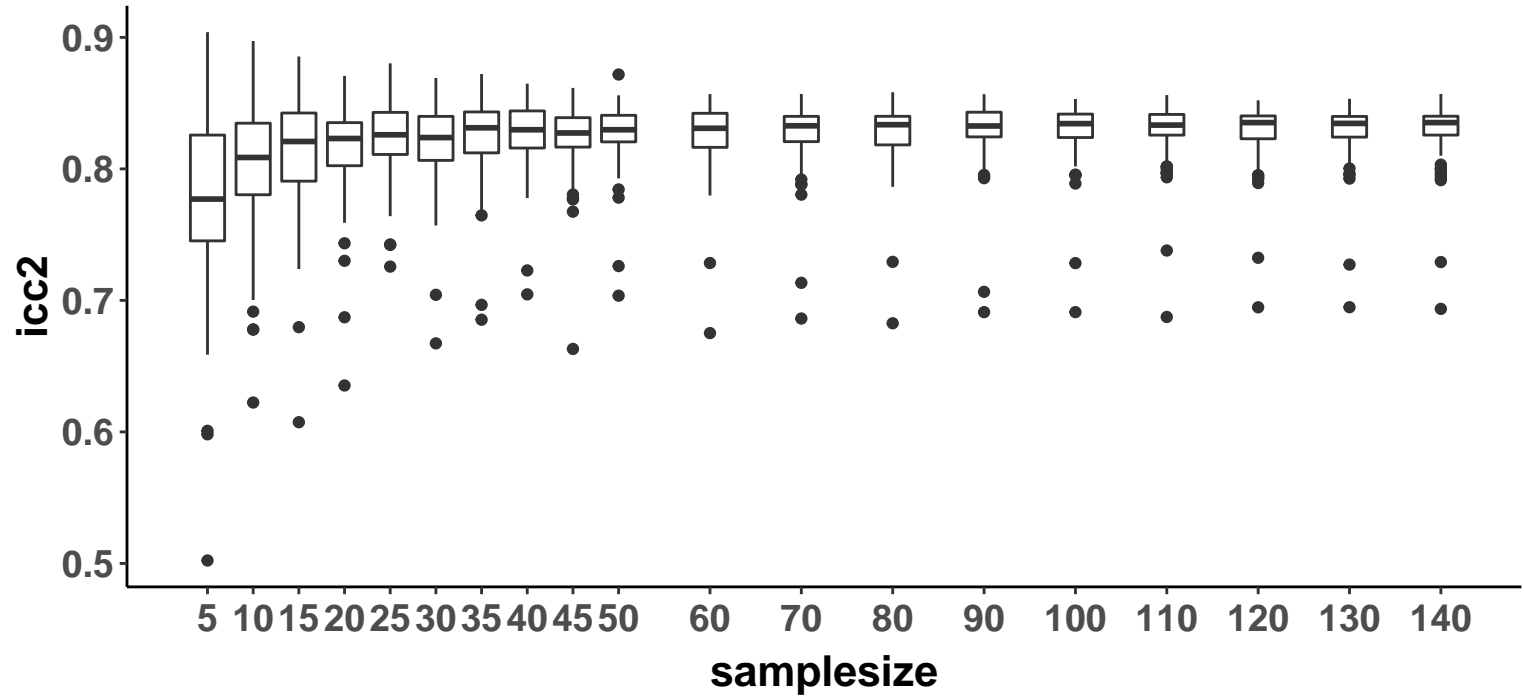

# HDLratio

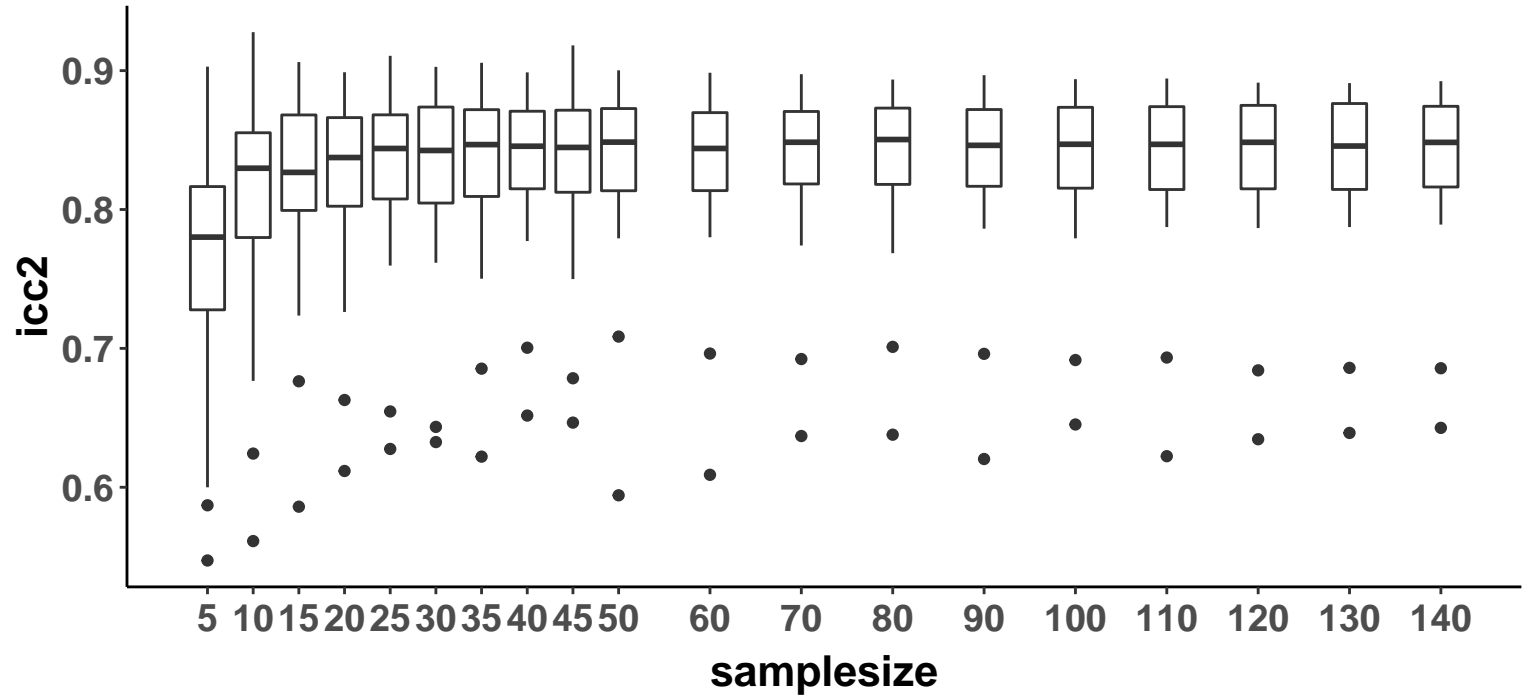

# LDL

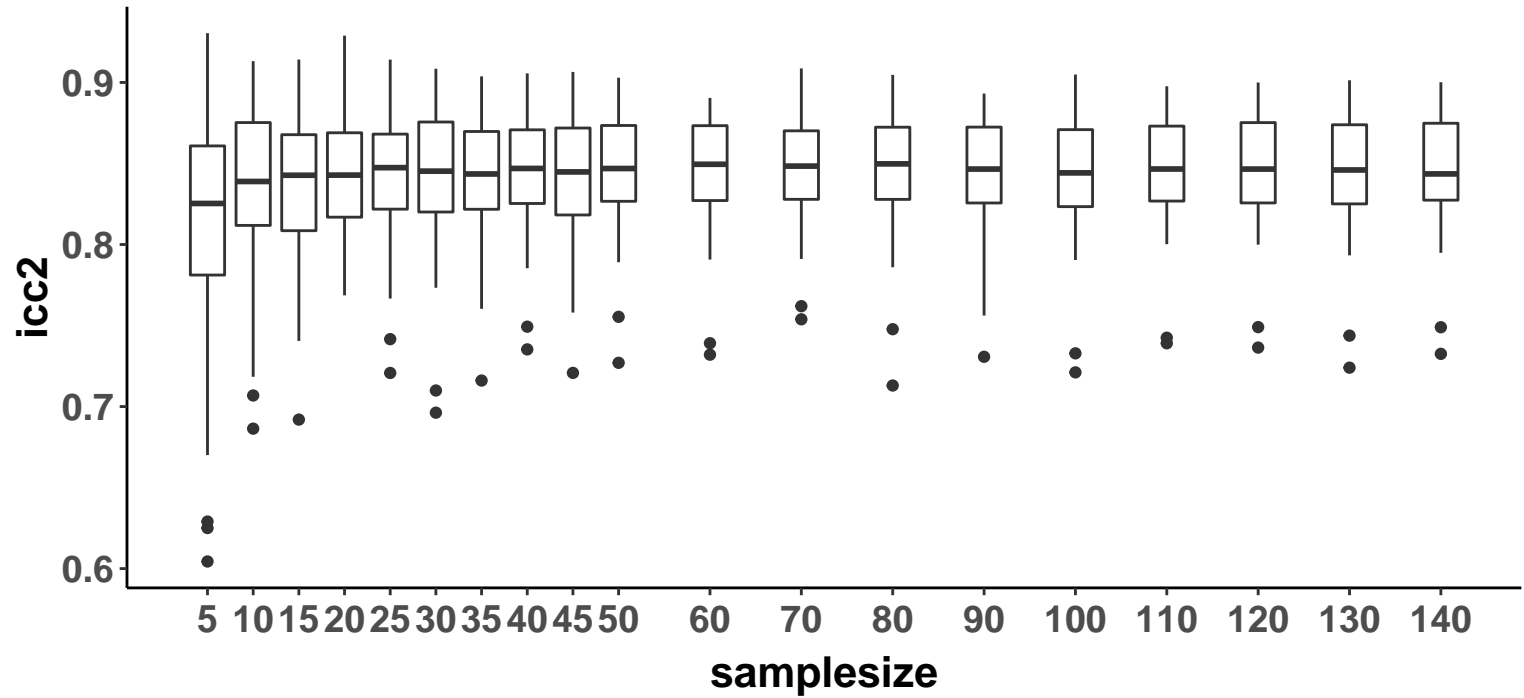

# Smoking\_McCartney

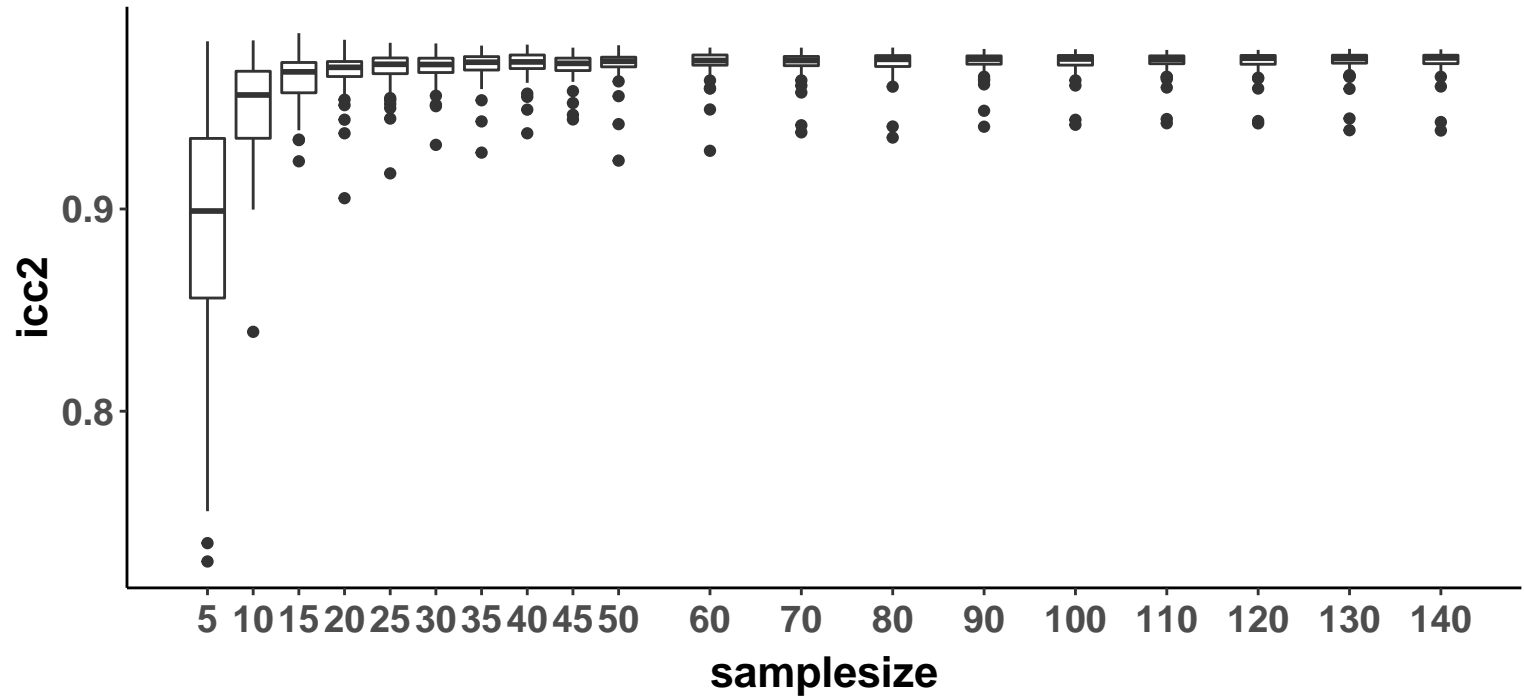

# WHR

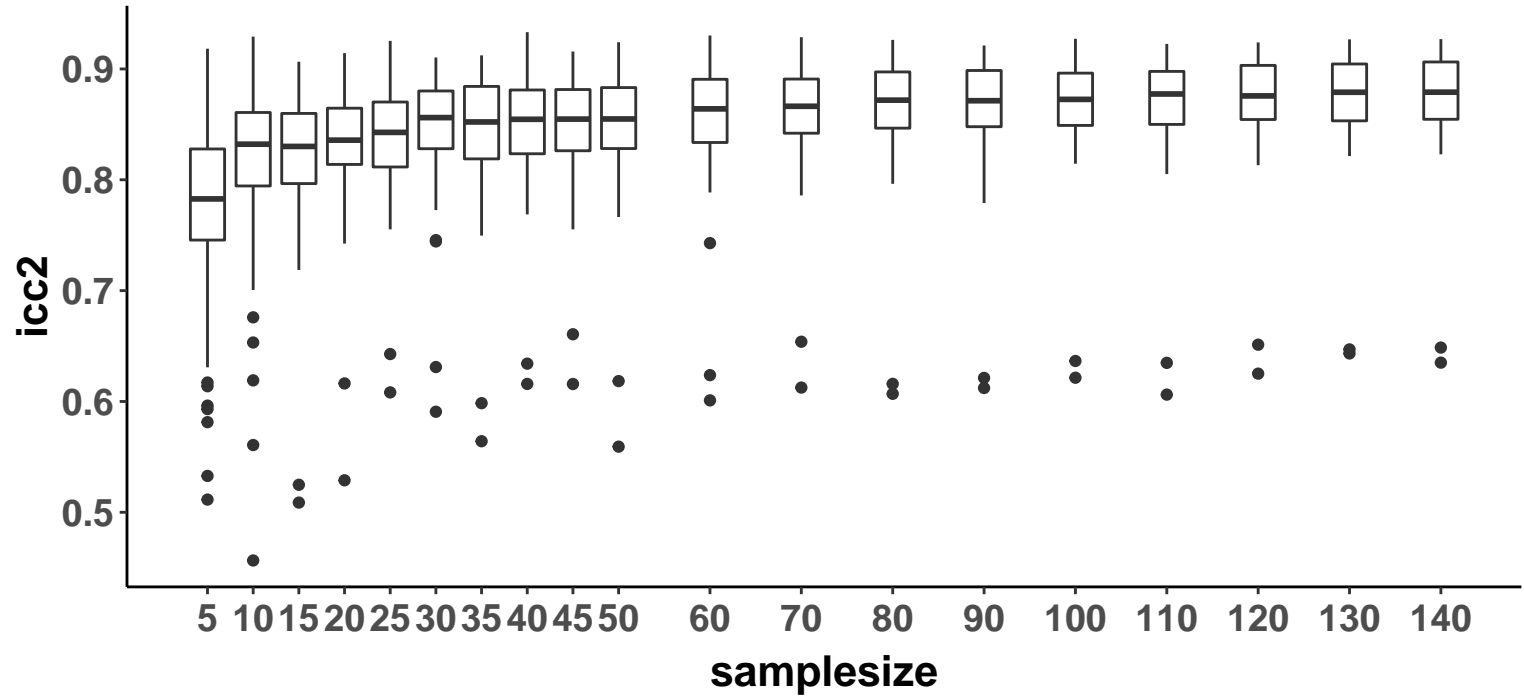

# Bcell

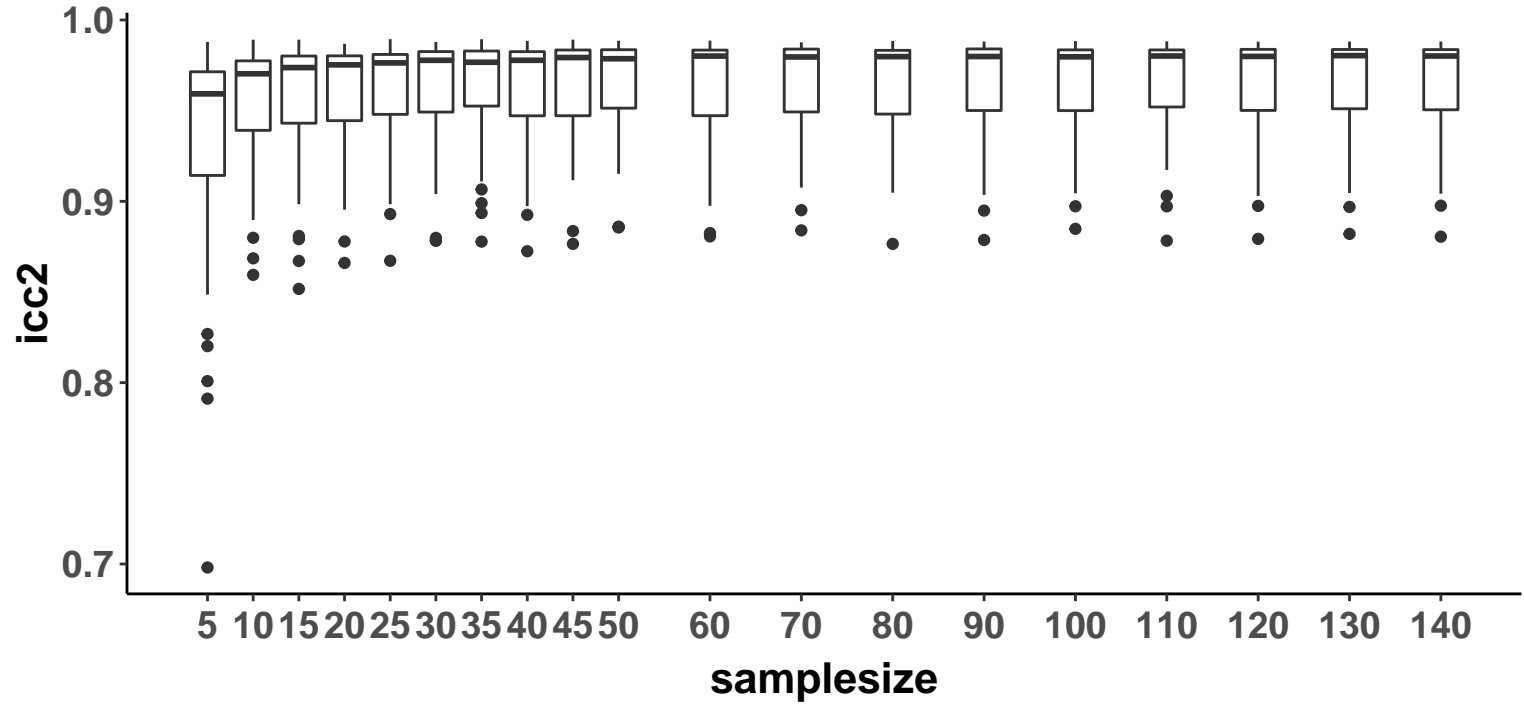



# CD4T

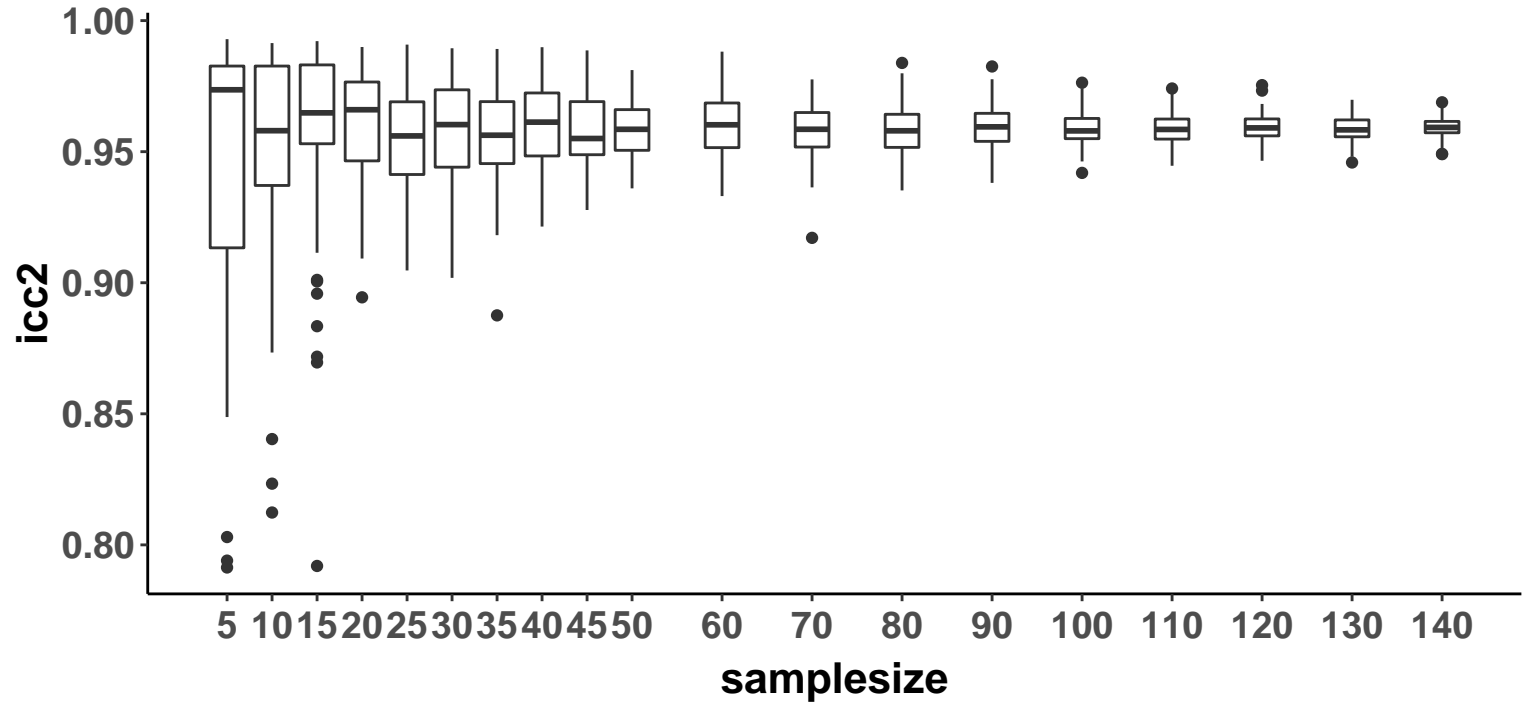

# CD8T

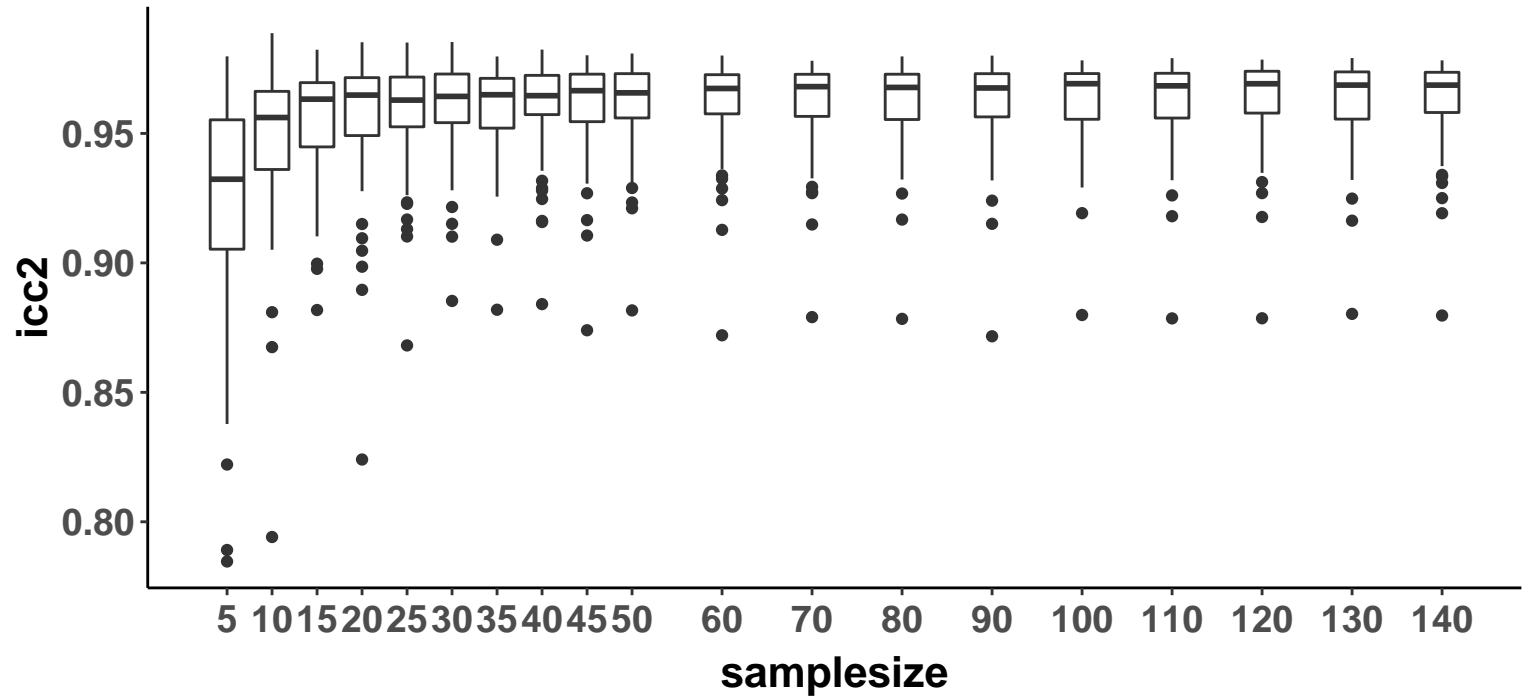

# Mono

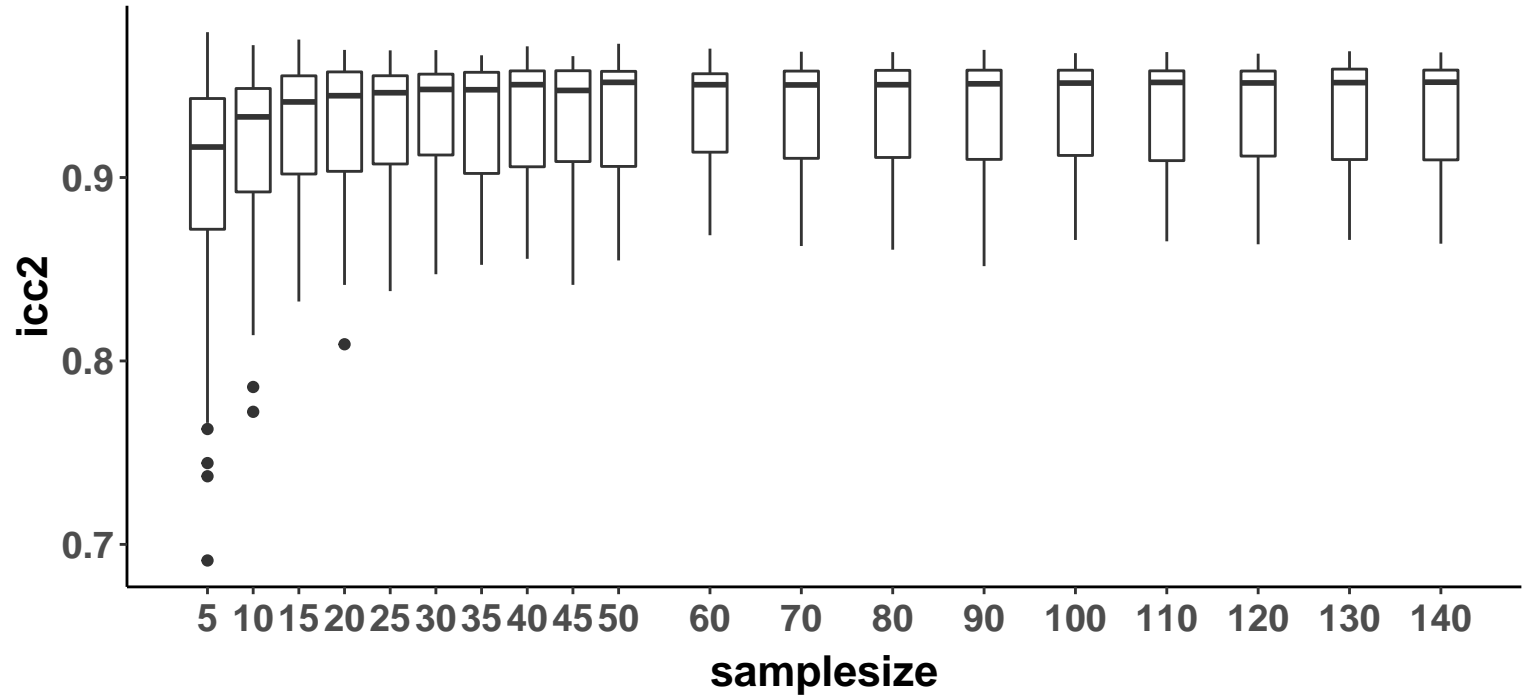

# NK

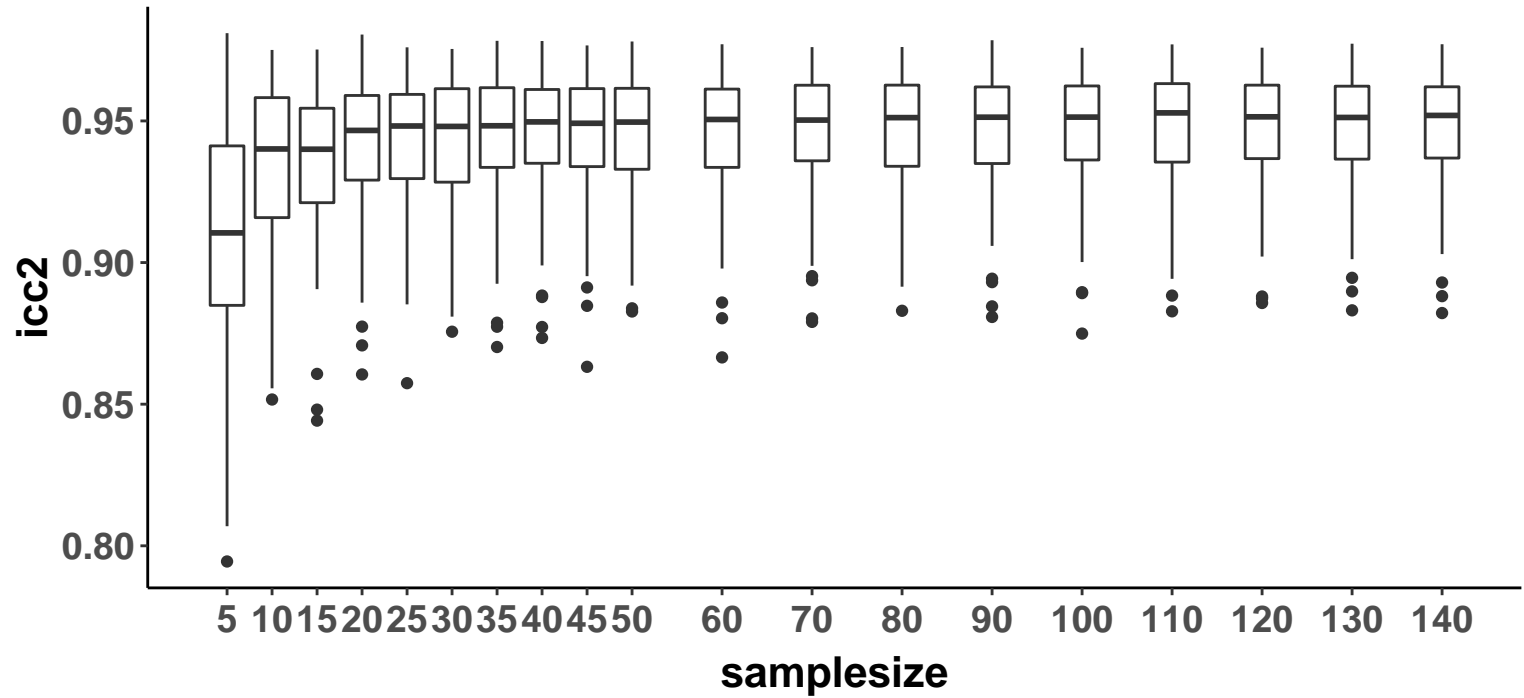

# Neu

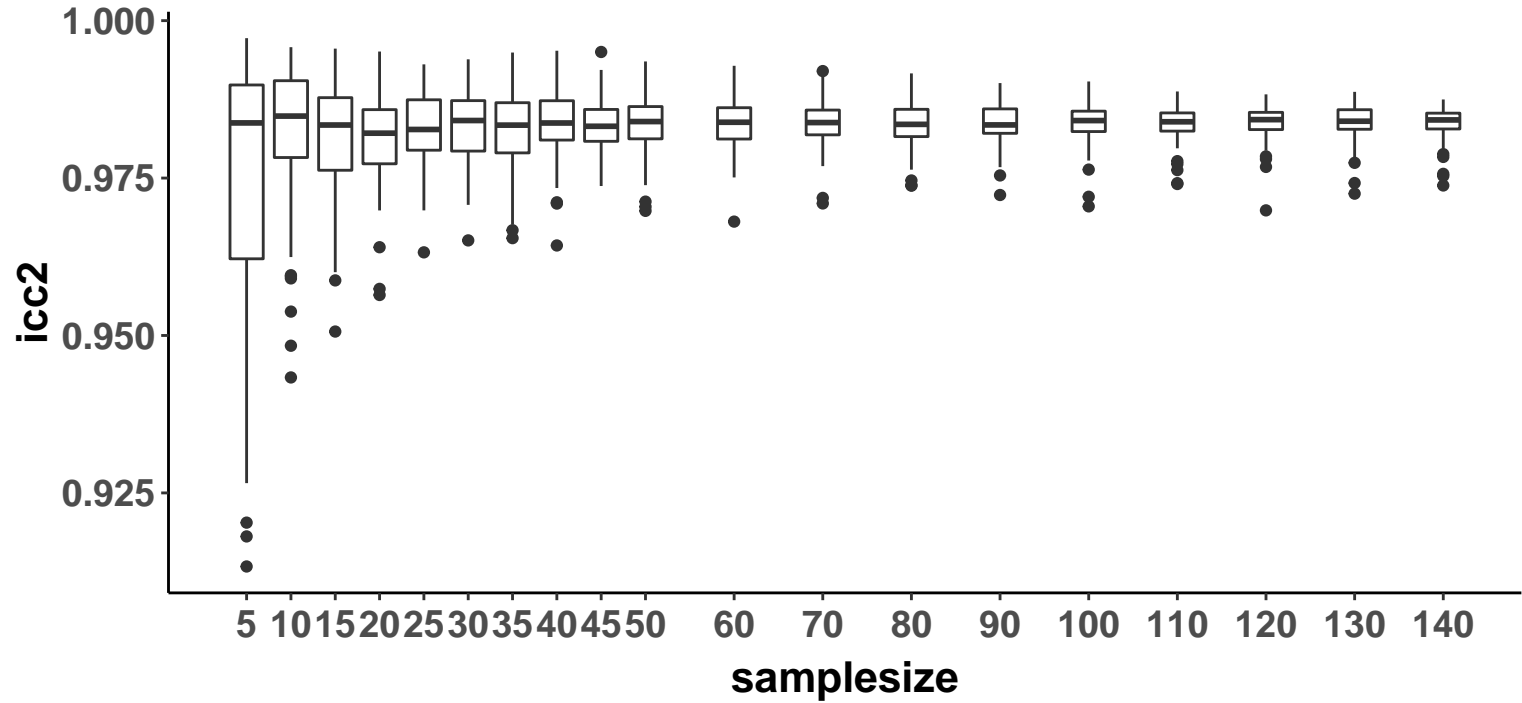

# GDF\_15

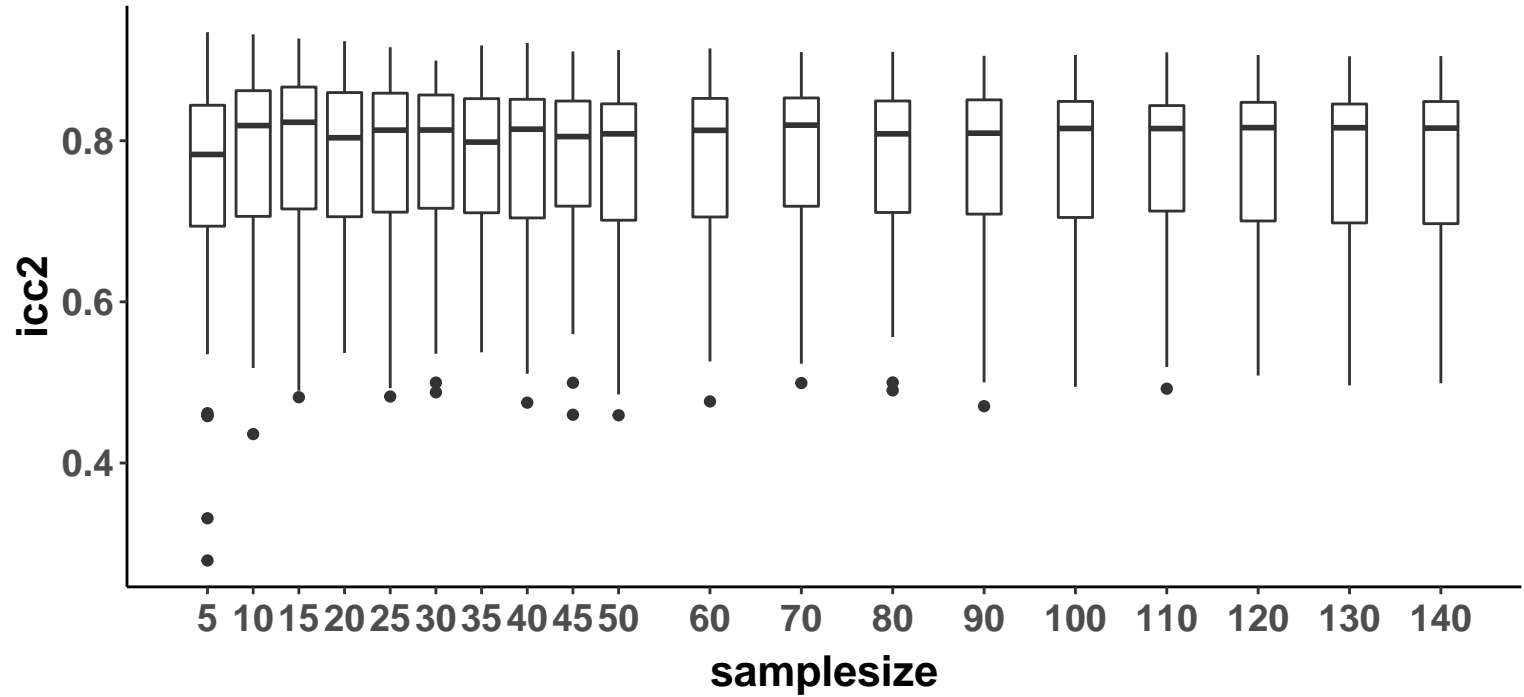

# B2M

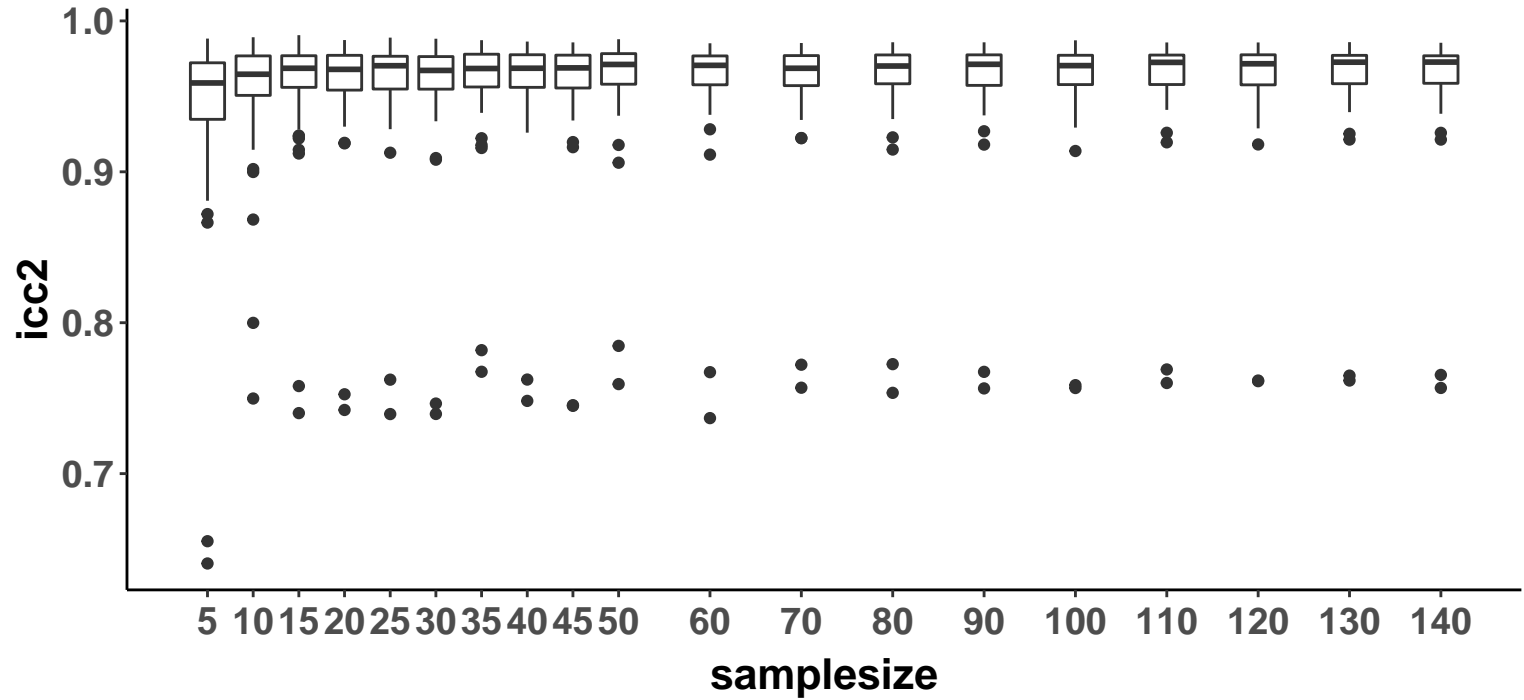

# Cystatin\_C

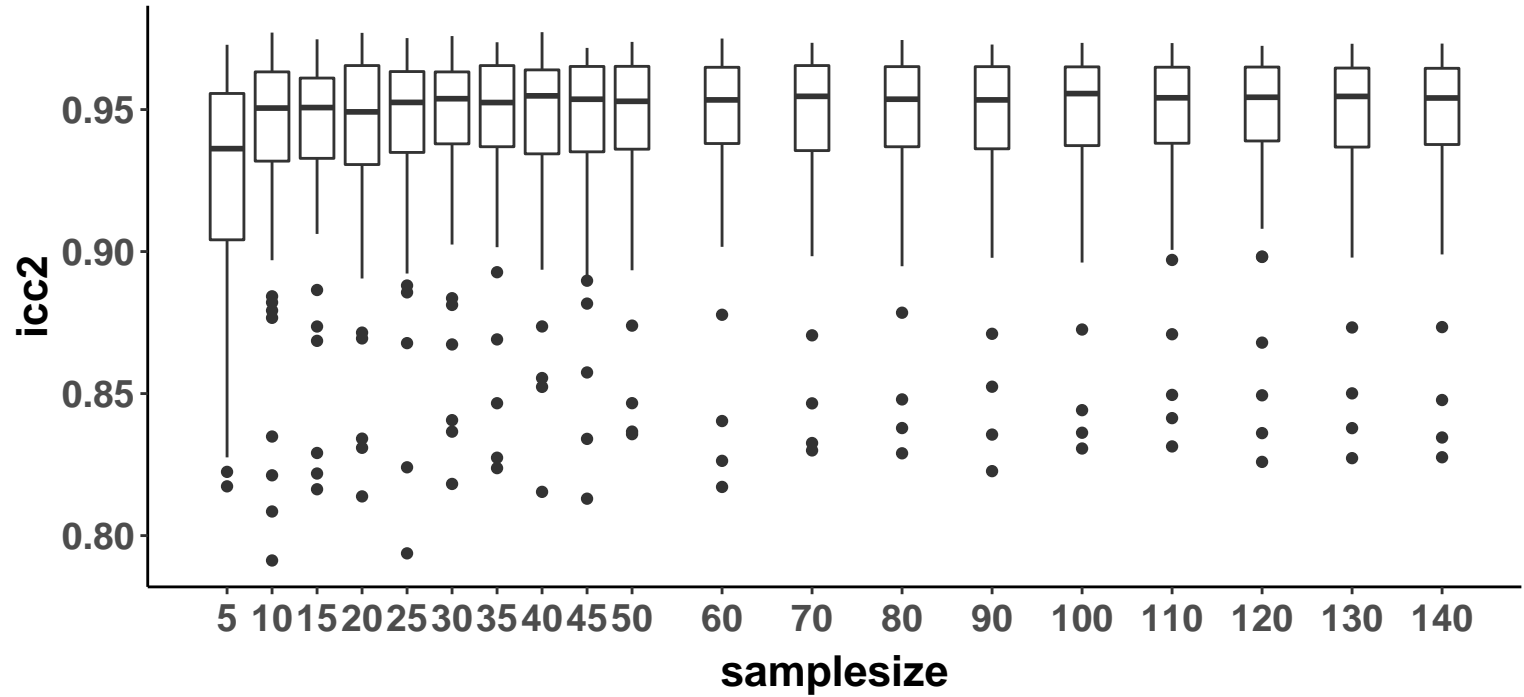



# TIMP\_1

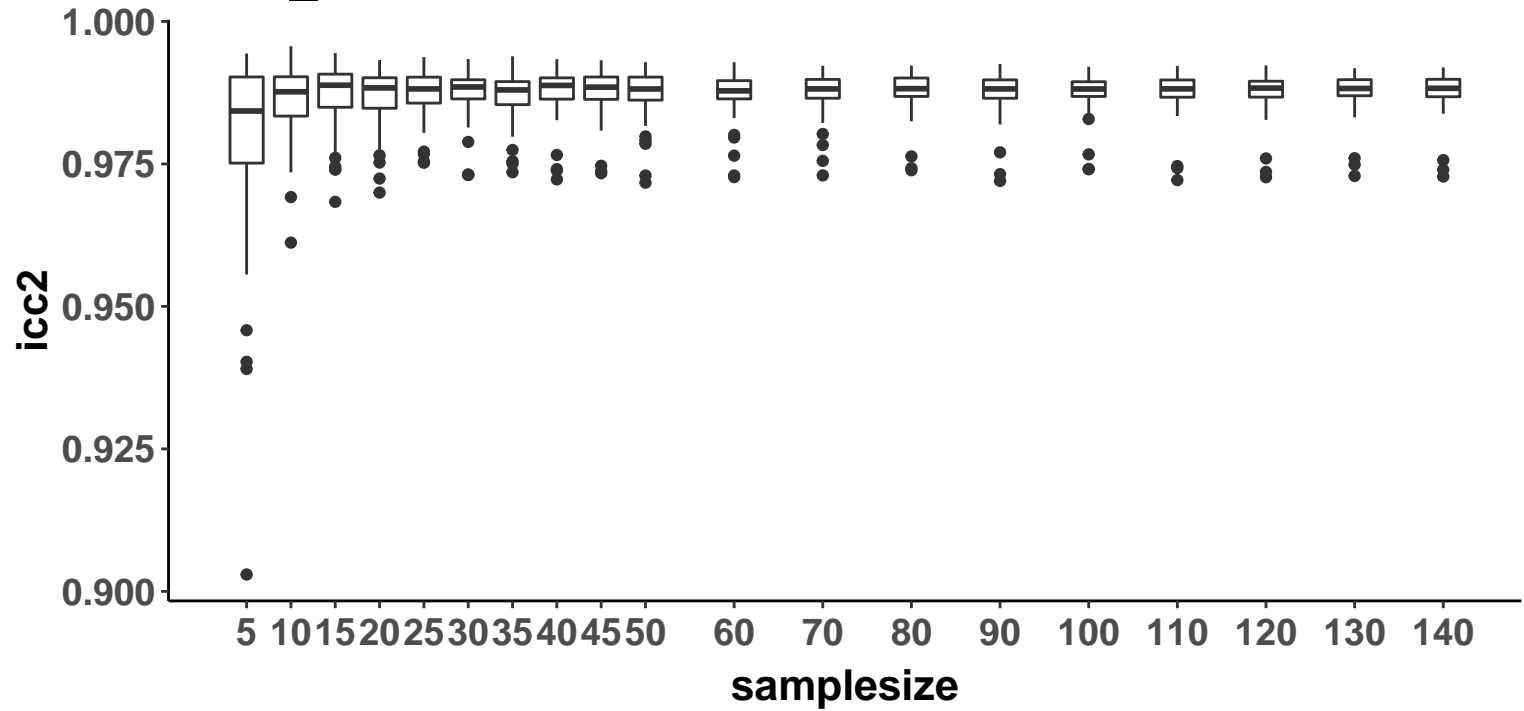

# ADM

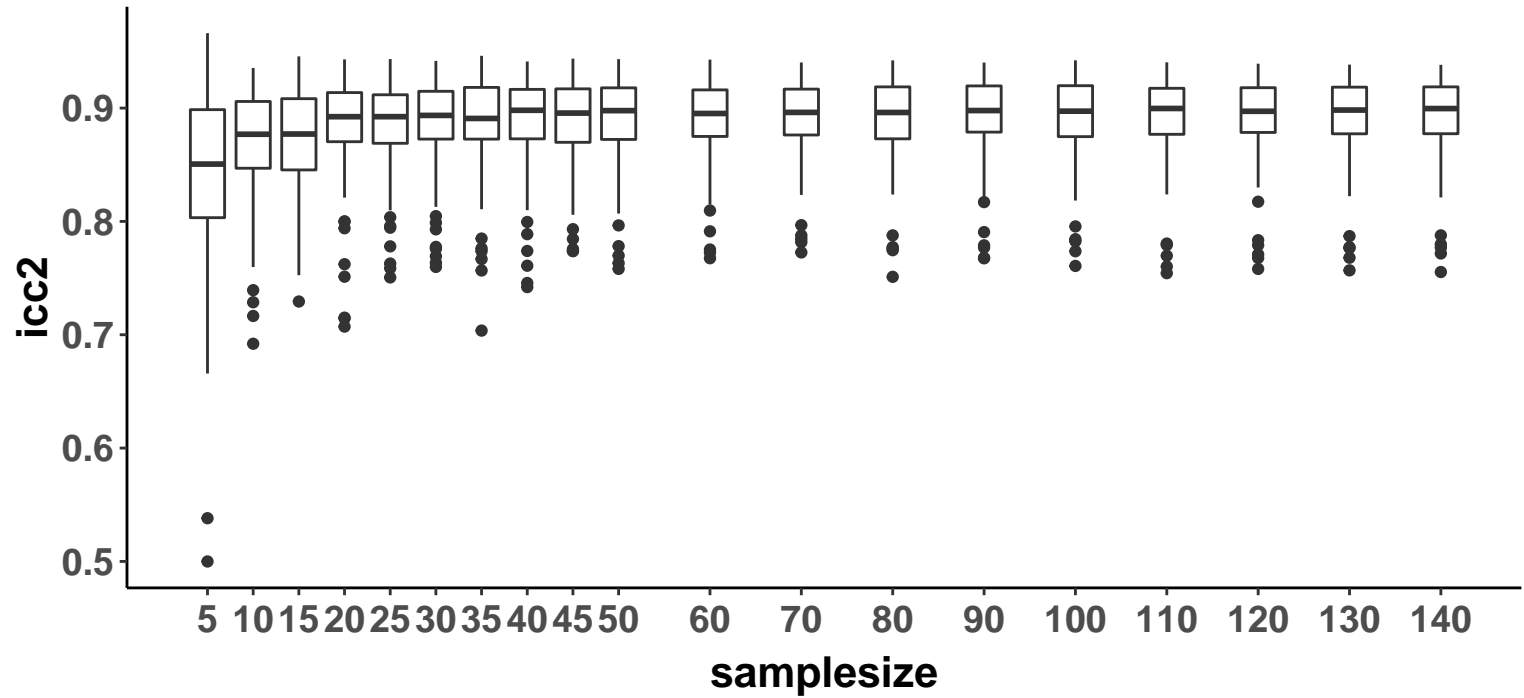

# PAI\_1

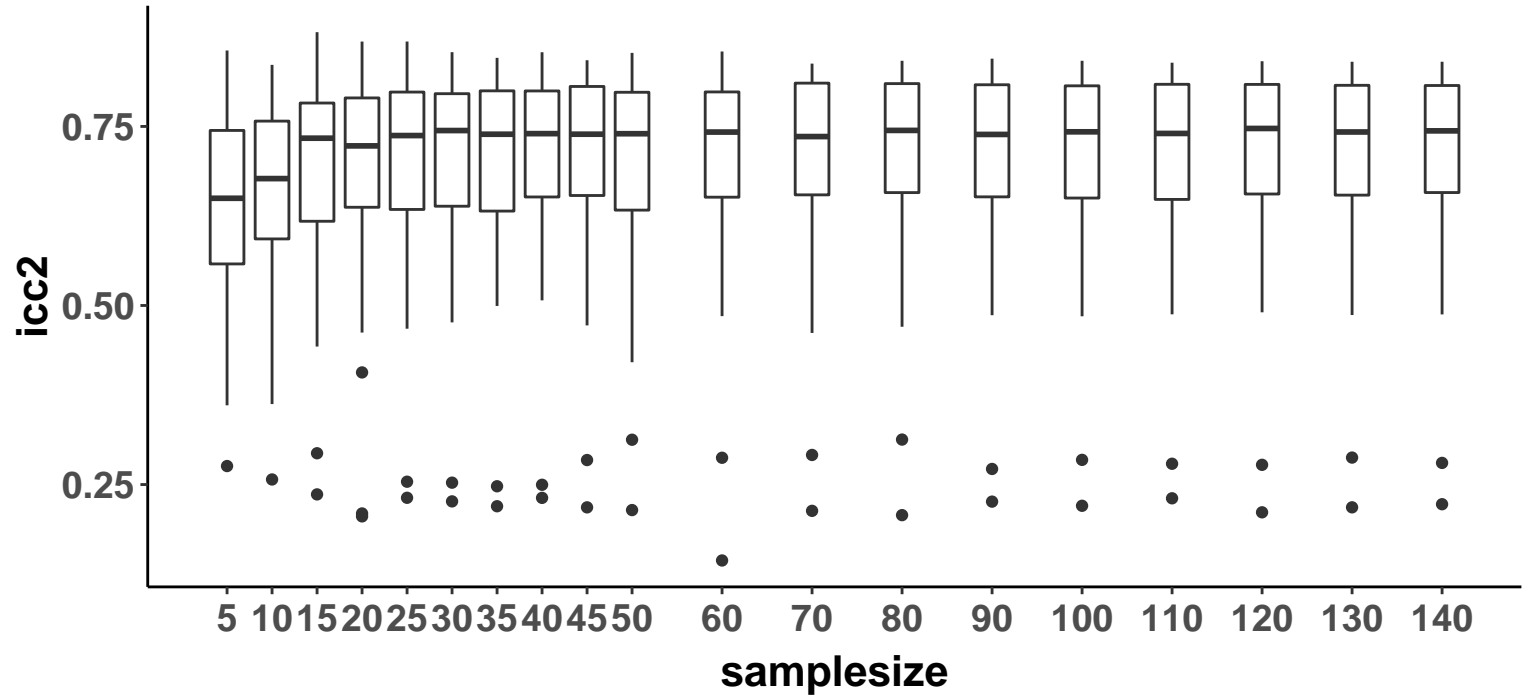

# Leptin

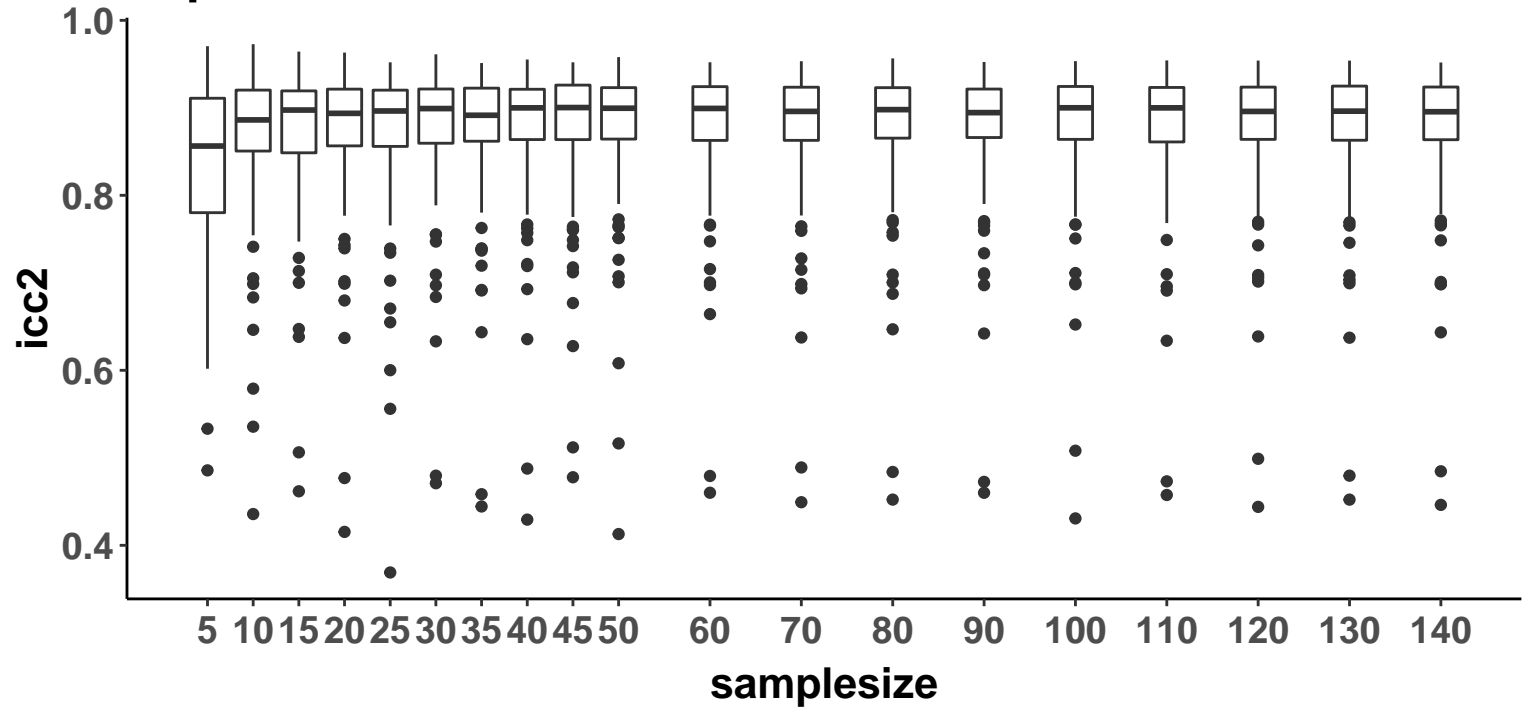

# Smoking\_Lu

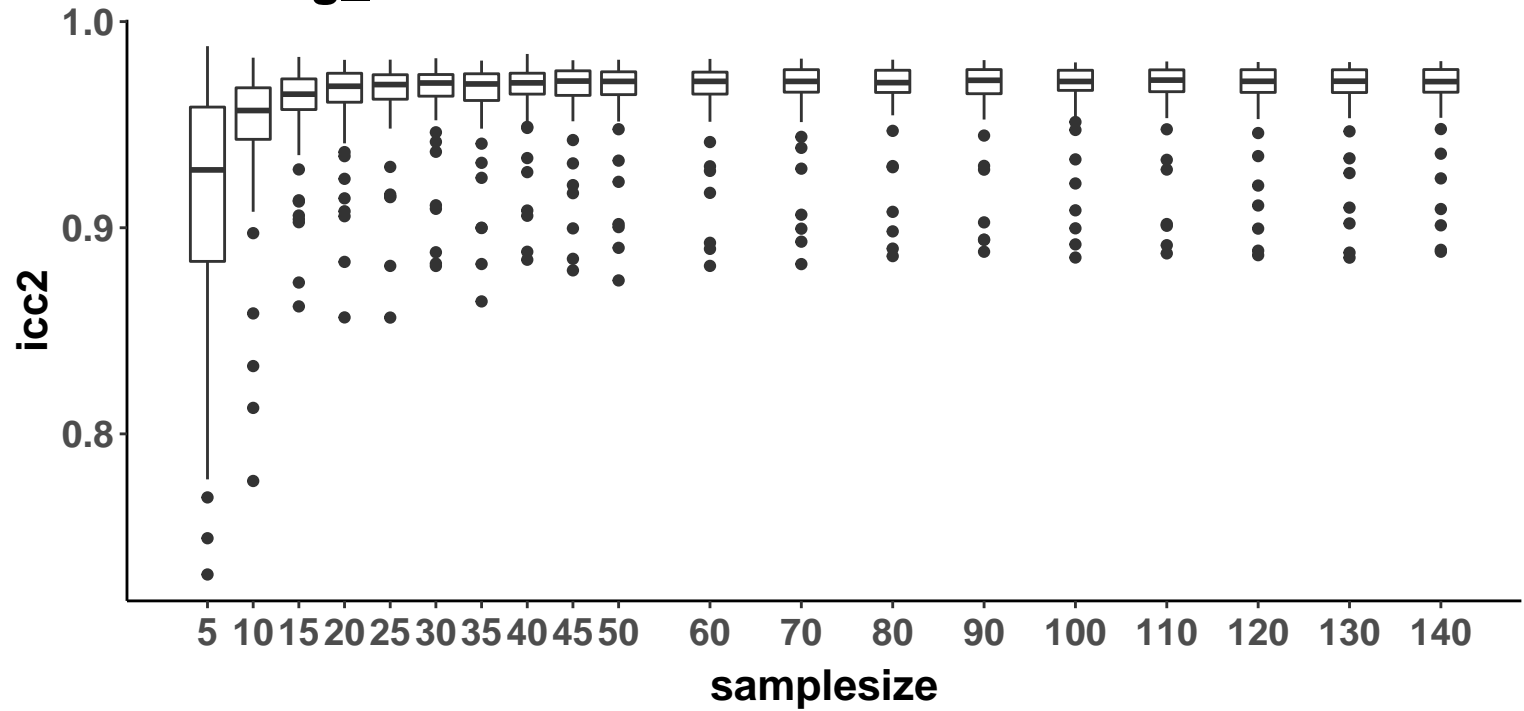

# PlasmaBlast

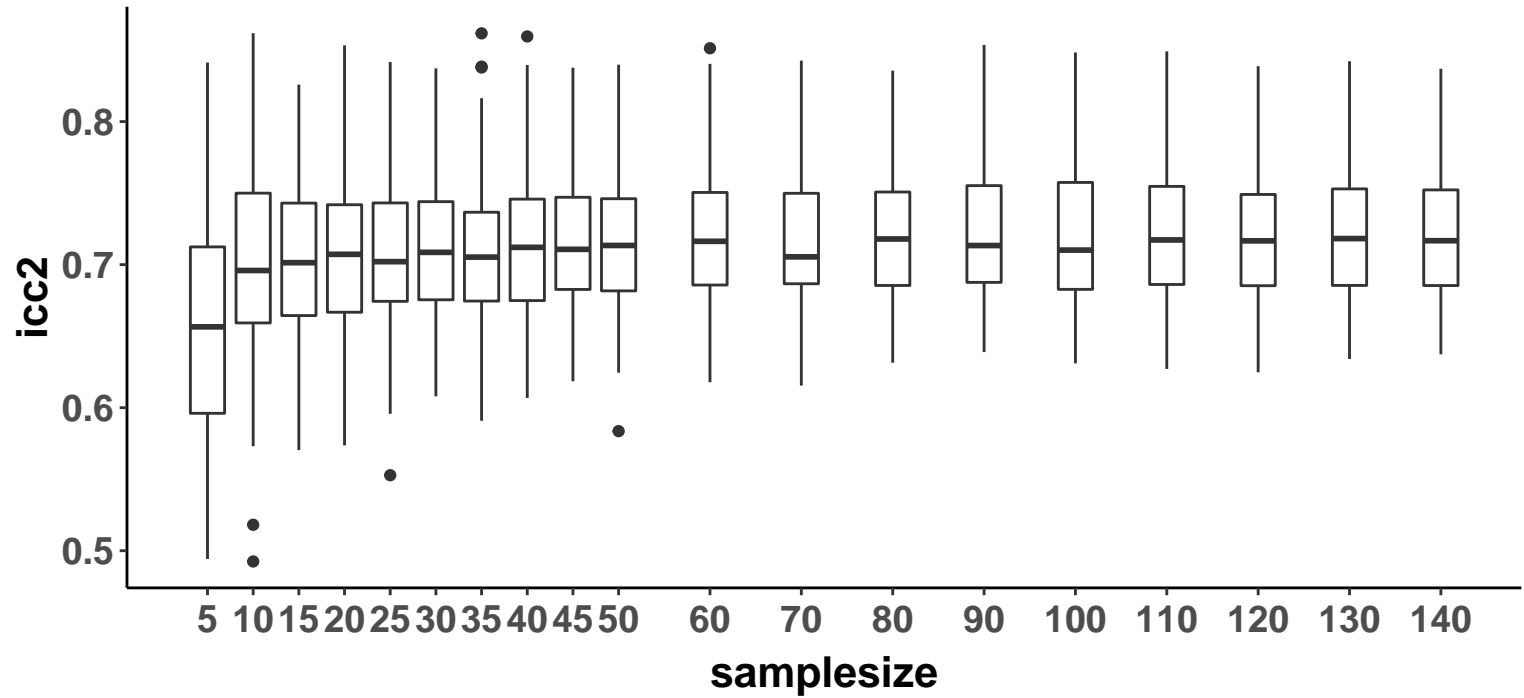

# CD8pCD28nCD45RA<sub>n</sub>

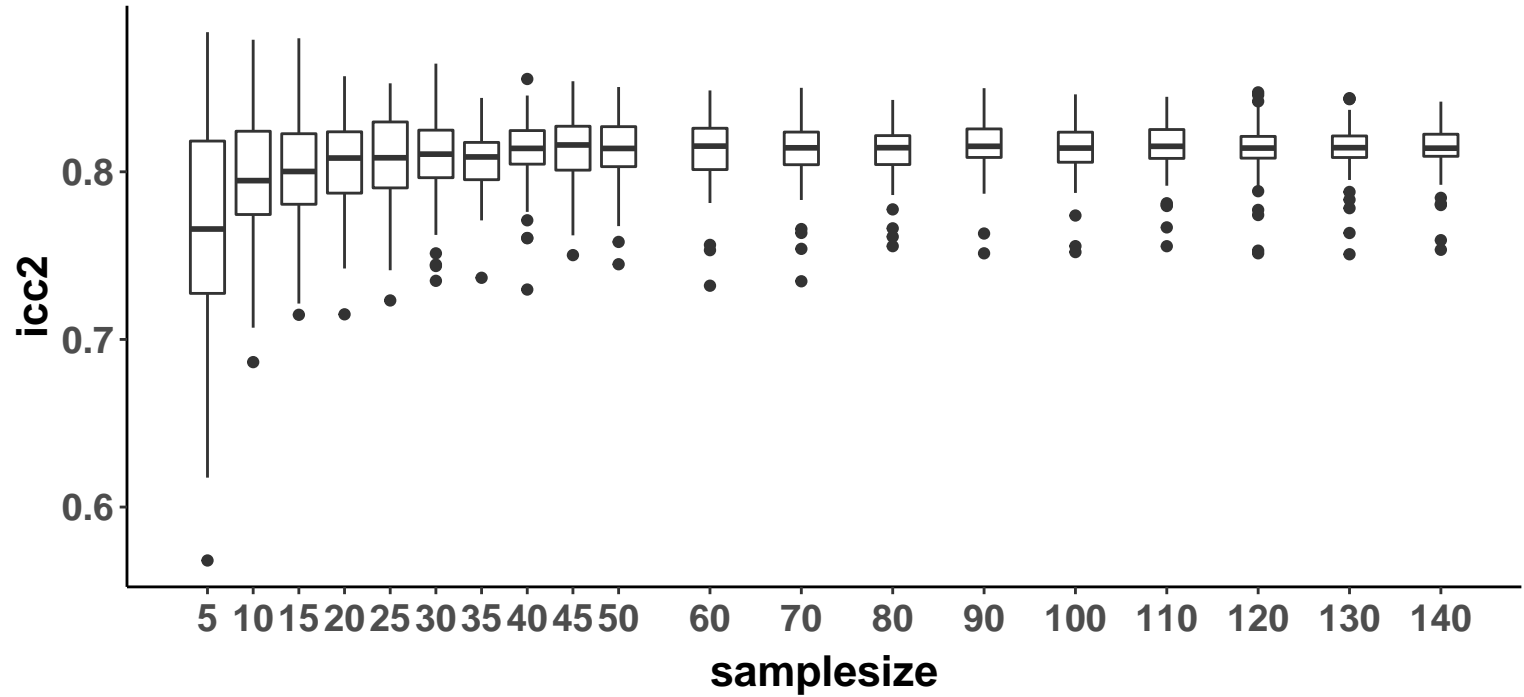

# CD8naive

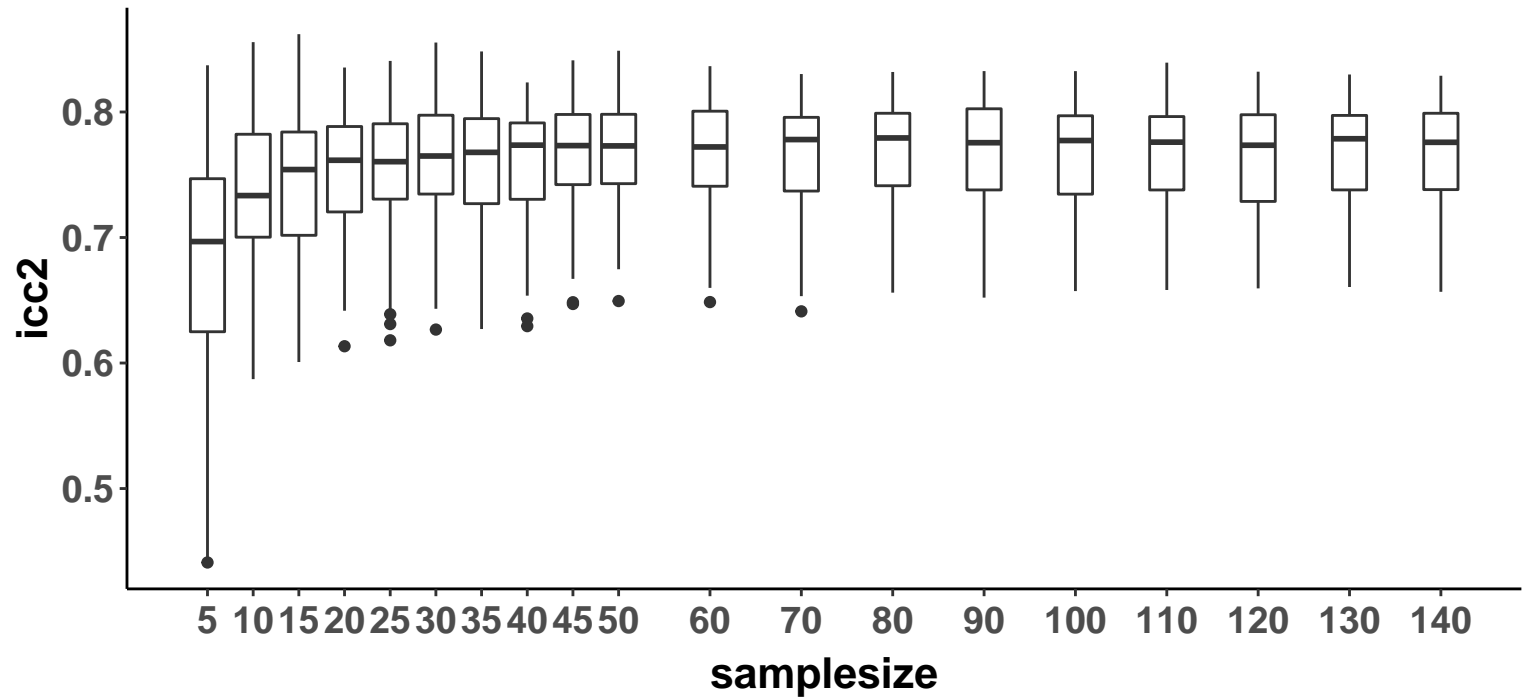



# GrimAge

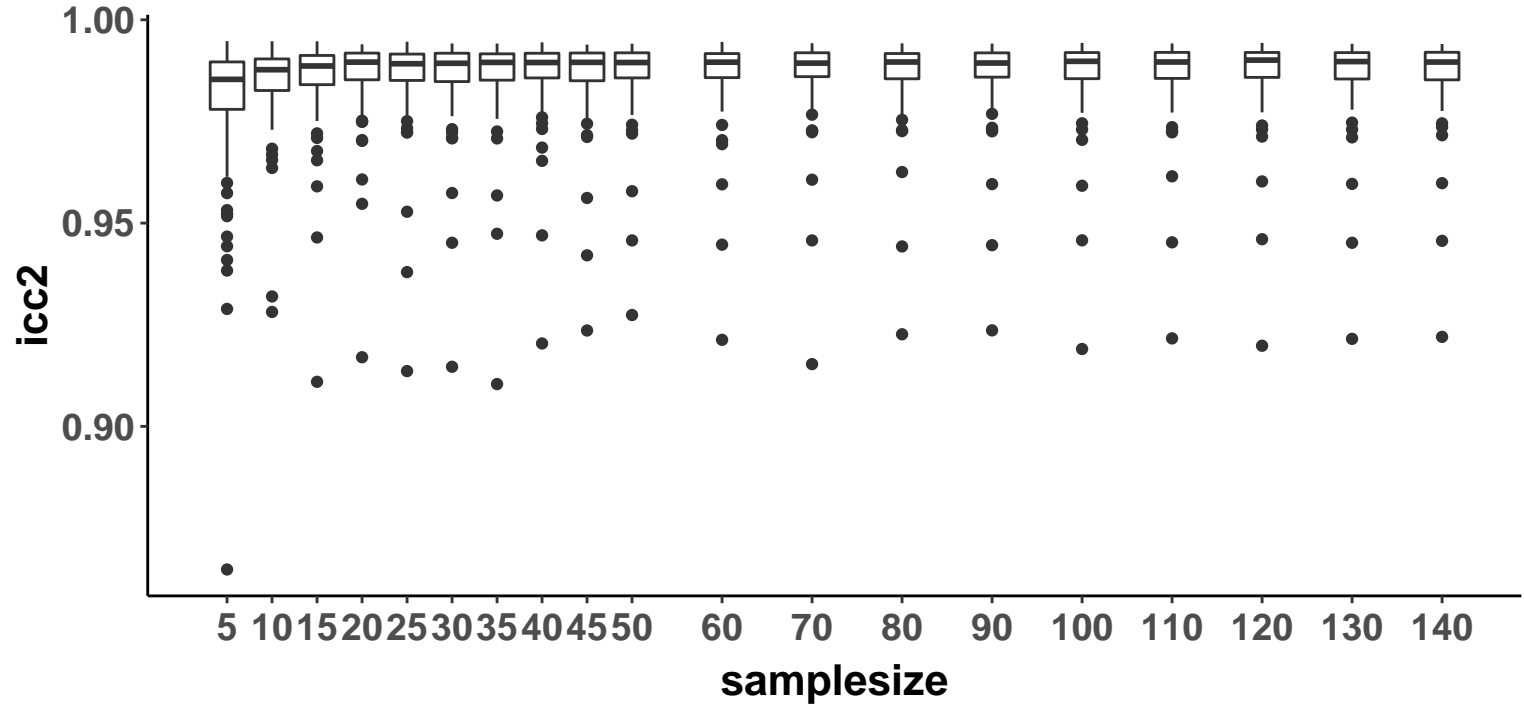

# BioAge4HAStatic

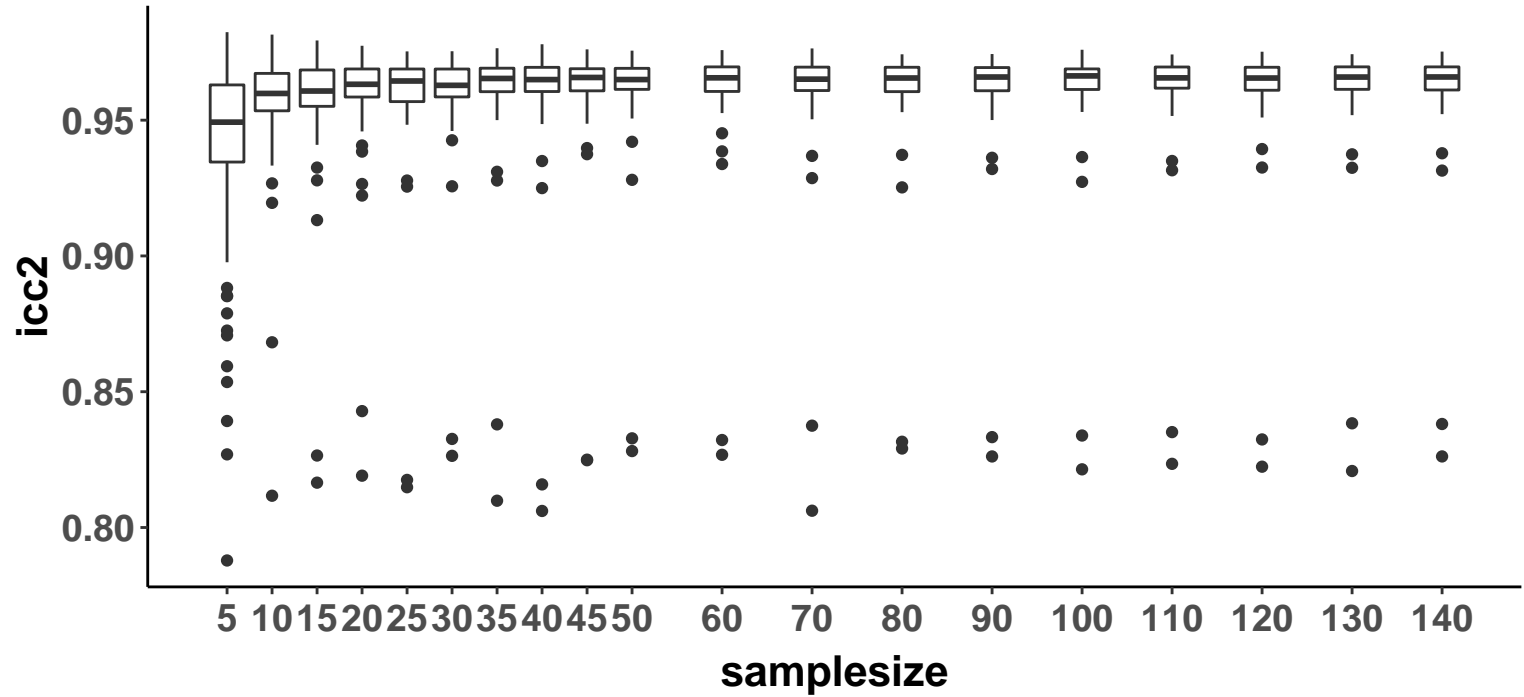

Supplement: 13059_2022_2793_MOESM7_ESM.pdf [file 13059_2022_2793_MOESM7_ESM.pdf]
