# Supplementary material for: Significant variation in the performance of DNA methylation predictors across data preprocessing and normalization strategies
Source: PubMed Central journal article supplement (PMC9590227; doi:10.1186/s13059-022-02793-w), 2022-10-24
Supplement: 13059_2022_2793_MOESM5_ESM.pdf [file 13059_2022_2793_MOESM5_ESM.pdf]

# HorvathAge

$\rho = -0.11$ ,  $P = 2.75e-01$

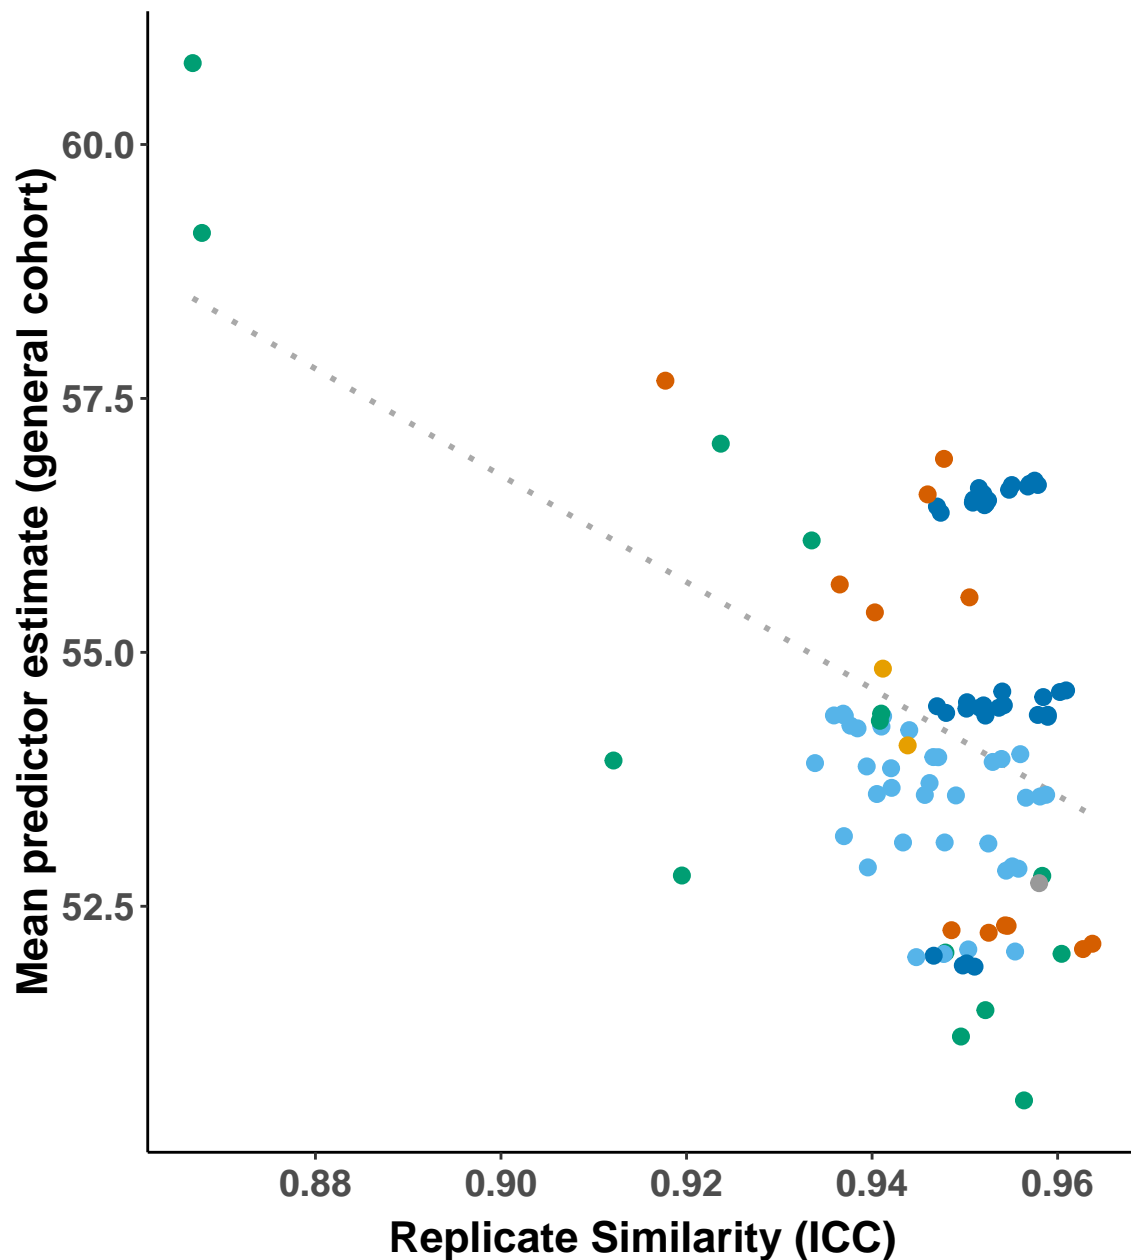

- Raw data
- ENmix\_RCP
- Minfi
- ENmix\_noRCP
- Hybrid
- Watermelon

$\rho = 0.39$ ,  $P = 5.62e-05$

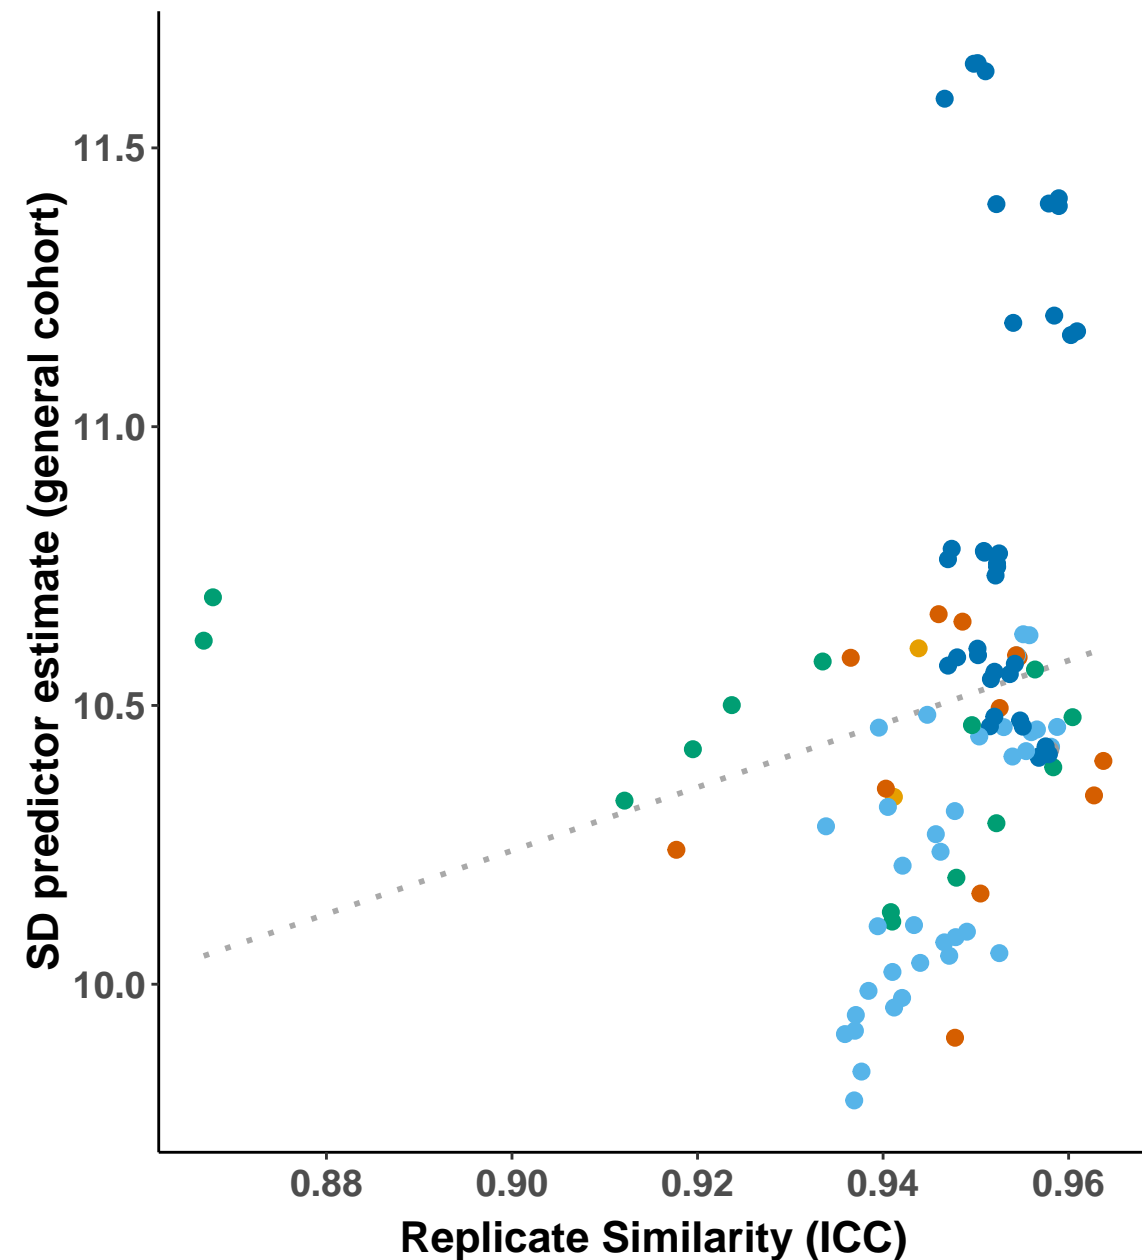

- Raw data
- ENmix\_RCP
- Minfi
- ENmix\_noRCP
- Hybrid
- Watermelon

# HannumAge

$\rho = -0.26$ ,  $P = 9.6e-03$

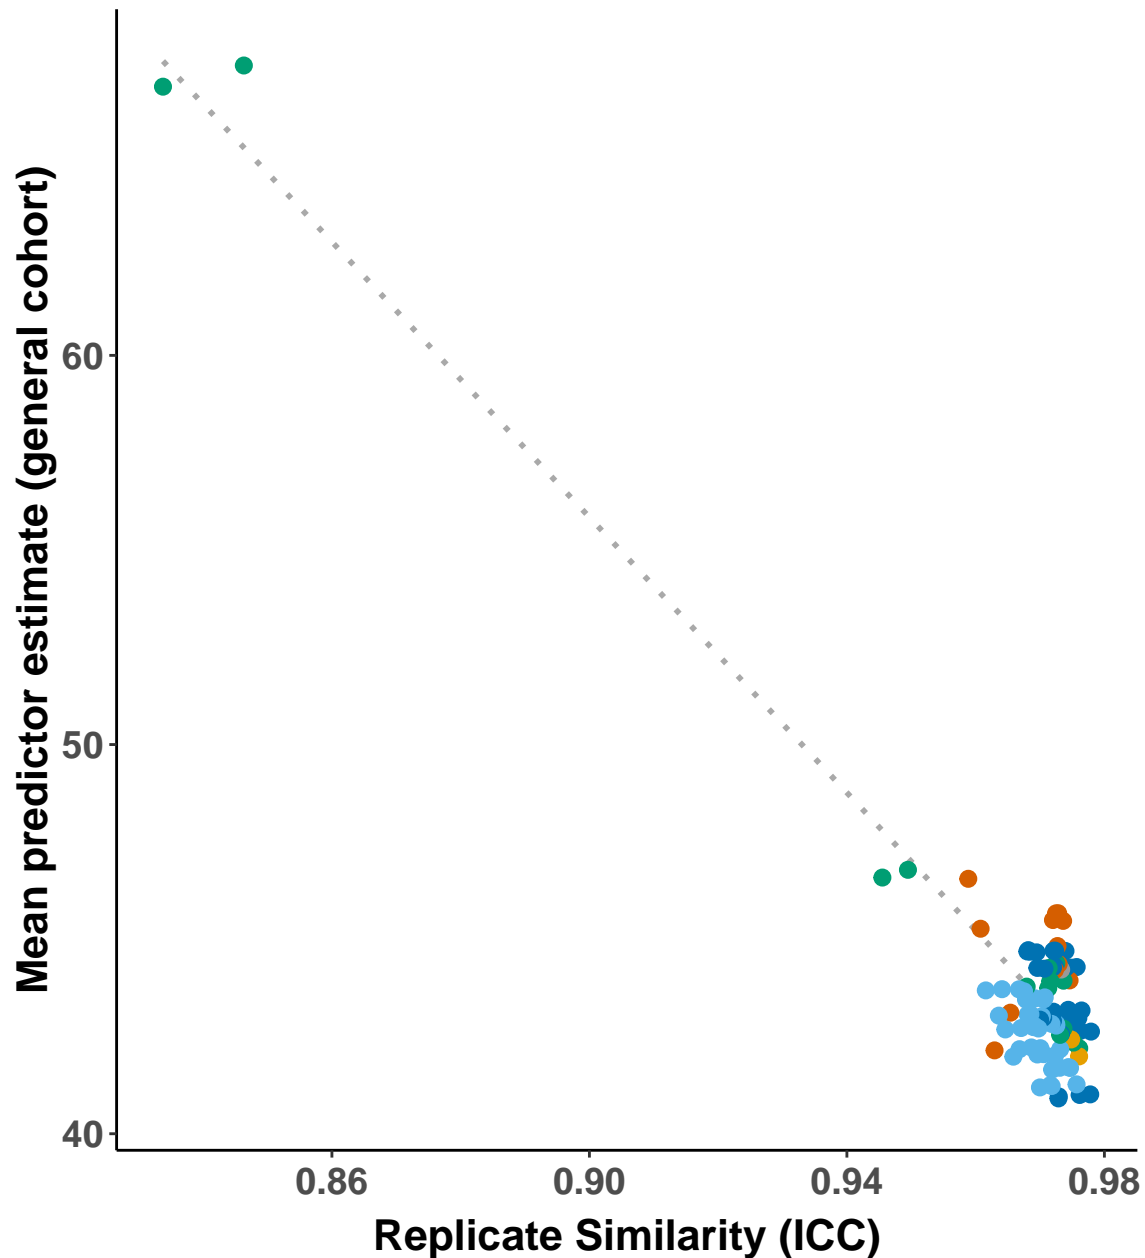

● Raw data    ● ENmix\_RCP    ● Minfi  
● ENmix\_noRCP    ● Hybrid    ● WaterRmelon

$\rho = 0.55$ ,  $P = 4.09e-09$

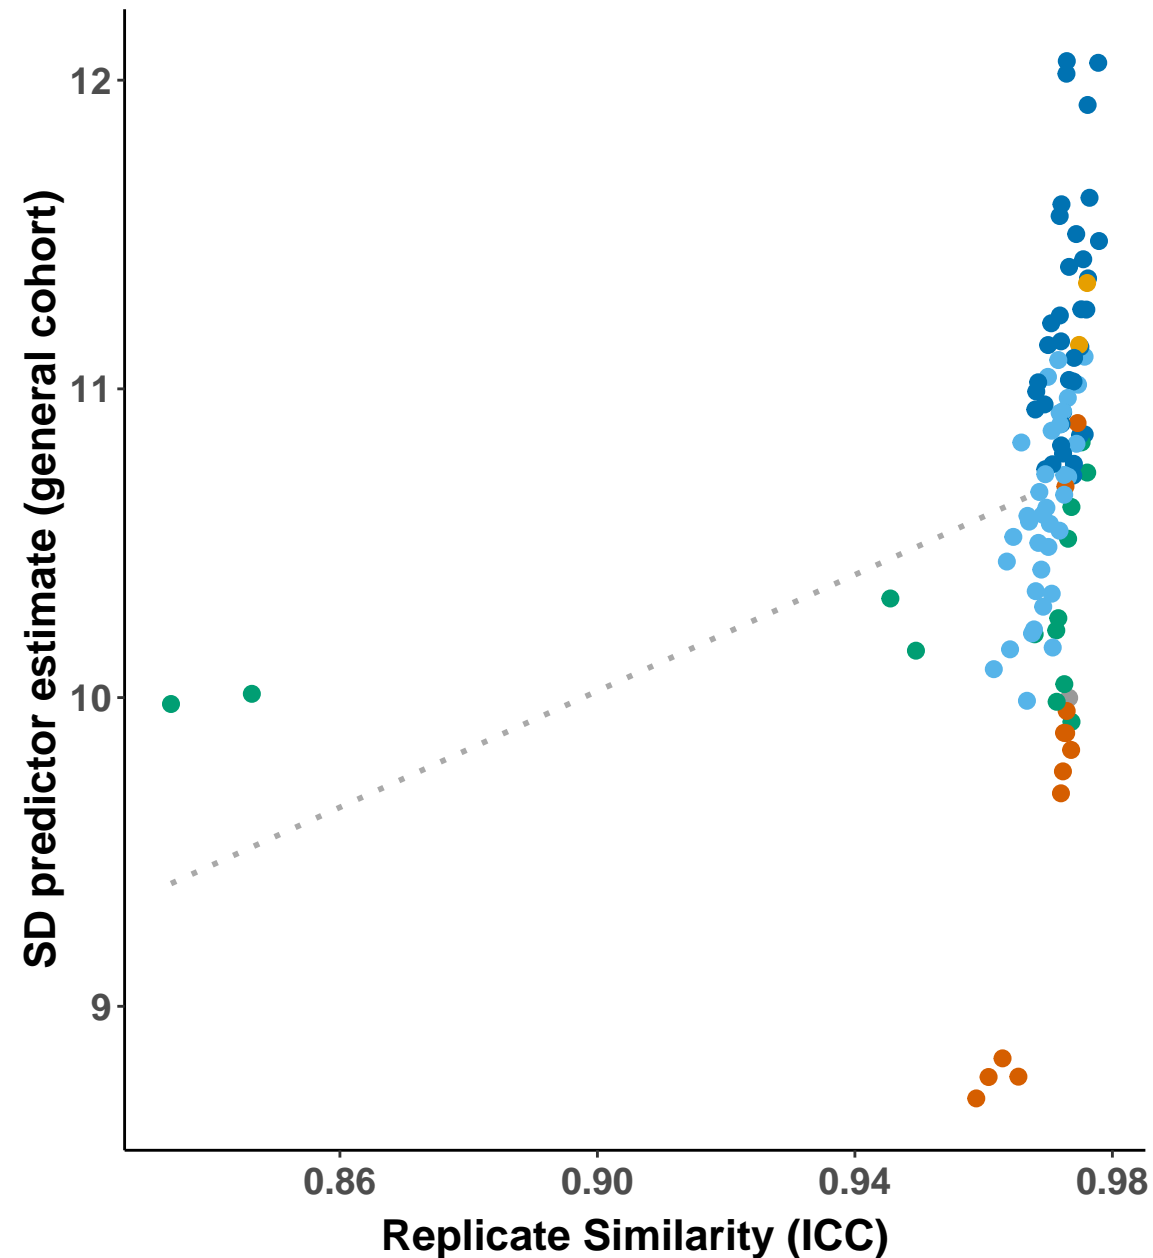

● Raw data    ● ENmix\_RCP    ● Minfi  
● ENmix\_noRCP    ● Hybrid    ● WaterRmelon

# PhenoAge

$\rho=0.37$ ,  $P=1.6e-04$

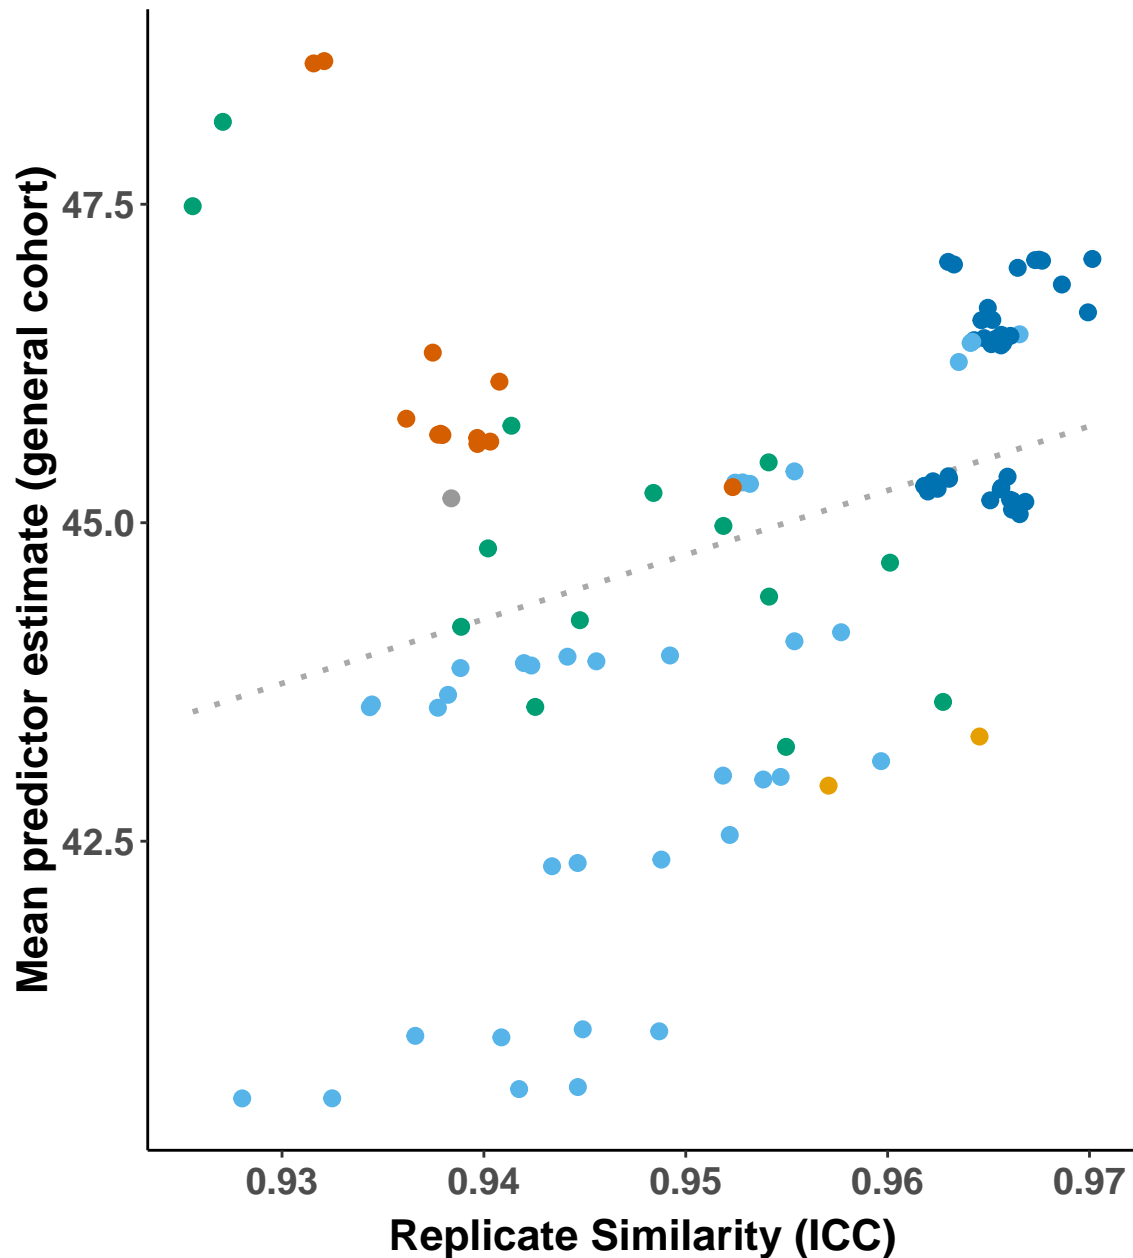

$\rho=0.52$ ,  $P=4.35e-08$

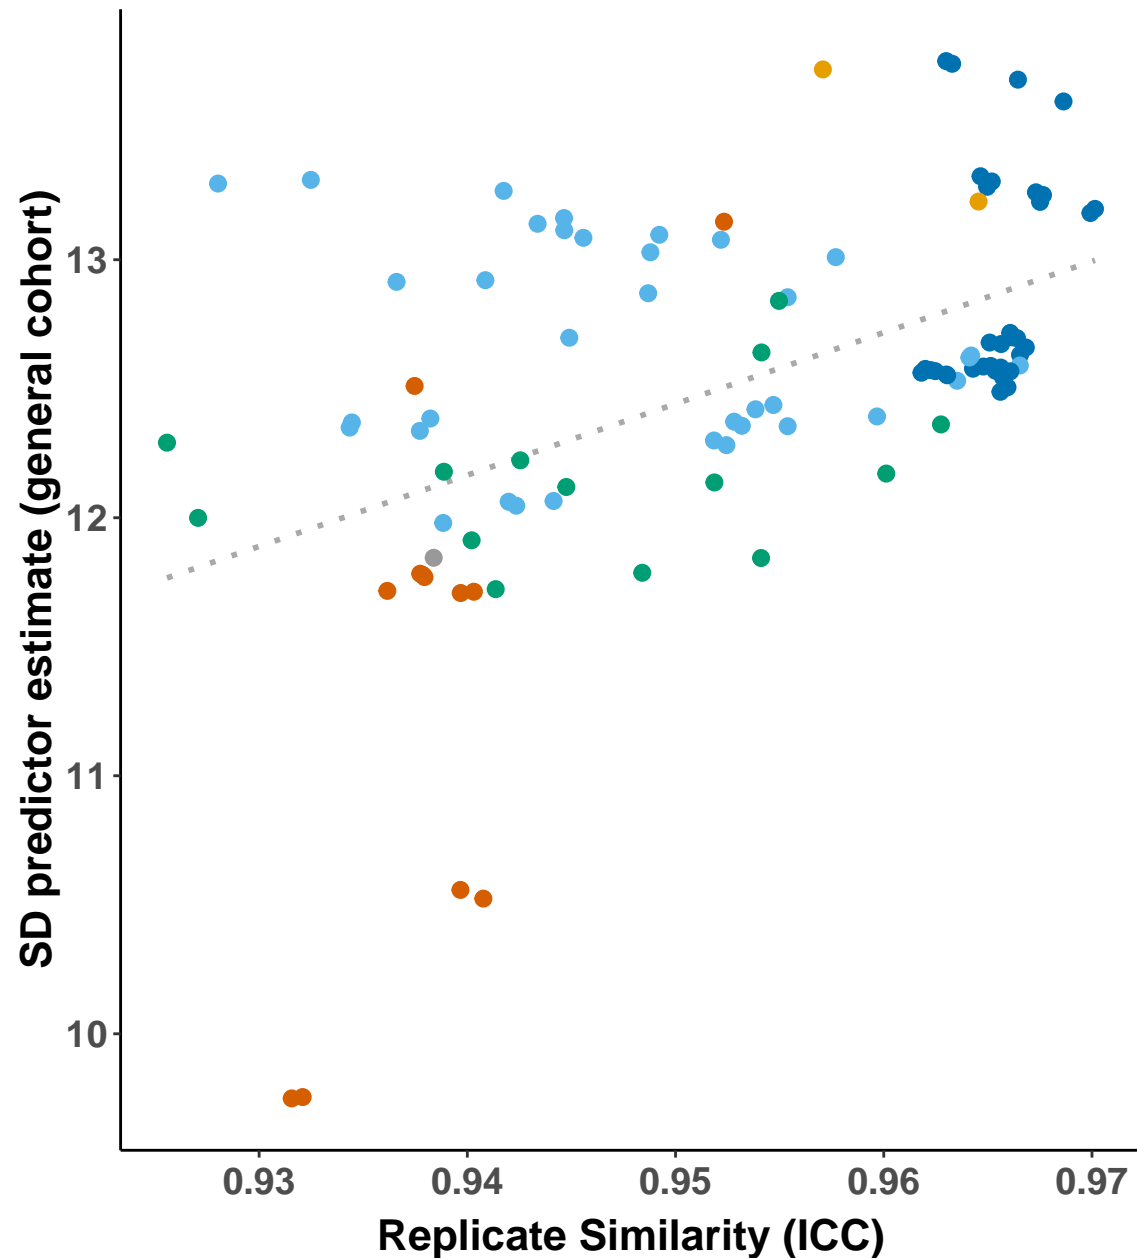

# SkinBloodAge

$\rho=0.14$  ,  $P=1.68e-01$

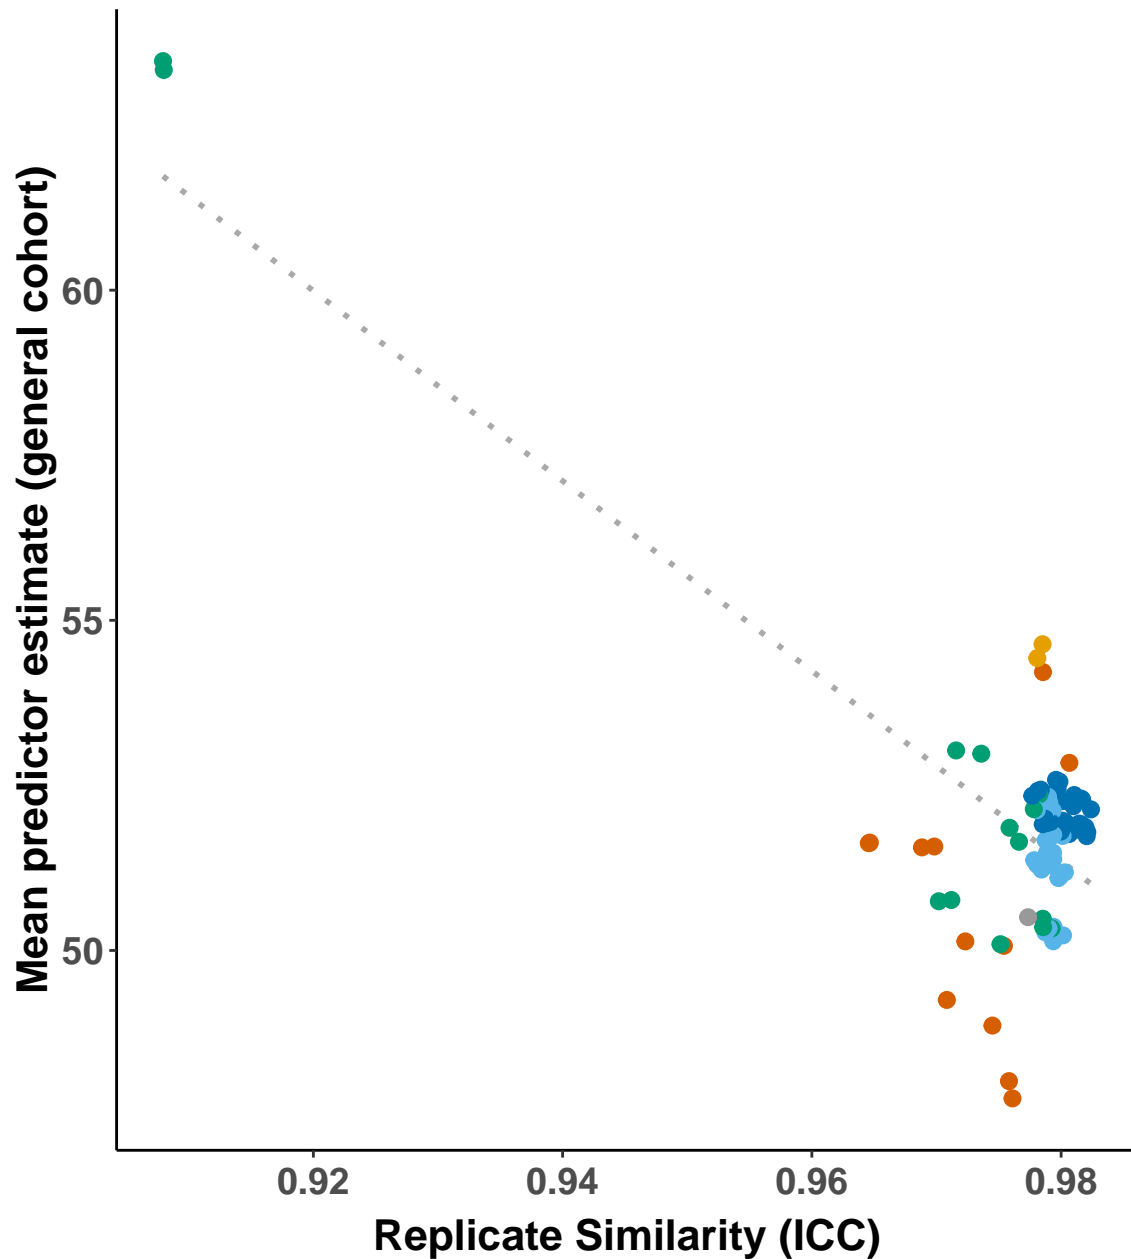

● Raw data    ● ENmix\_RCP    ● Minfi  
● ENmix\_noRCP    ● Hybrid    ● WateRmelon

$\rho=0.61$  ,  $P=0e+00$

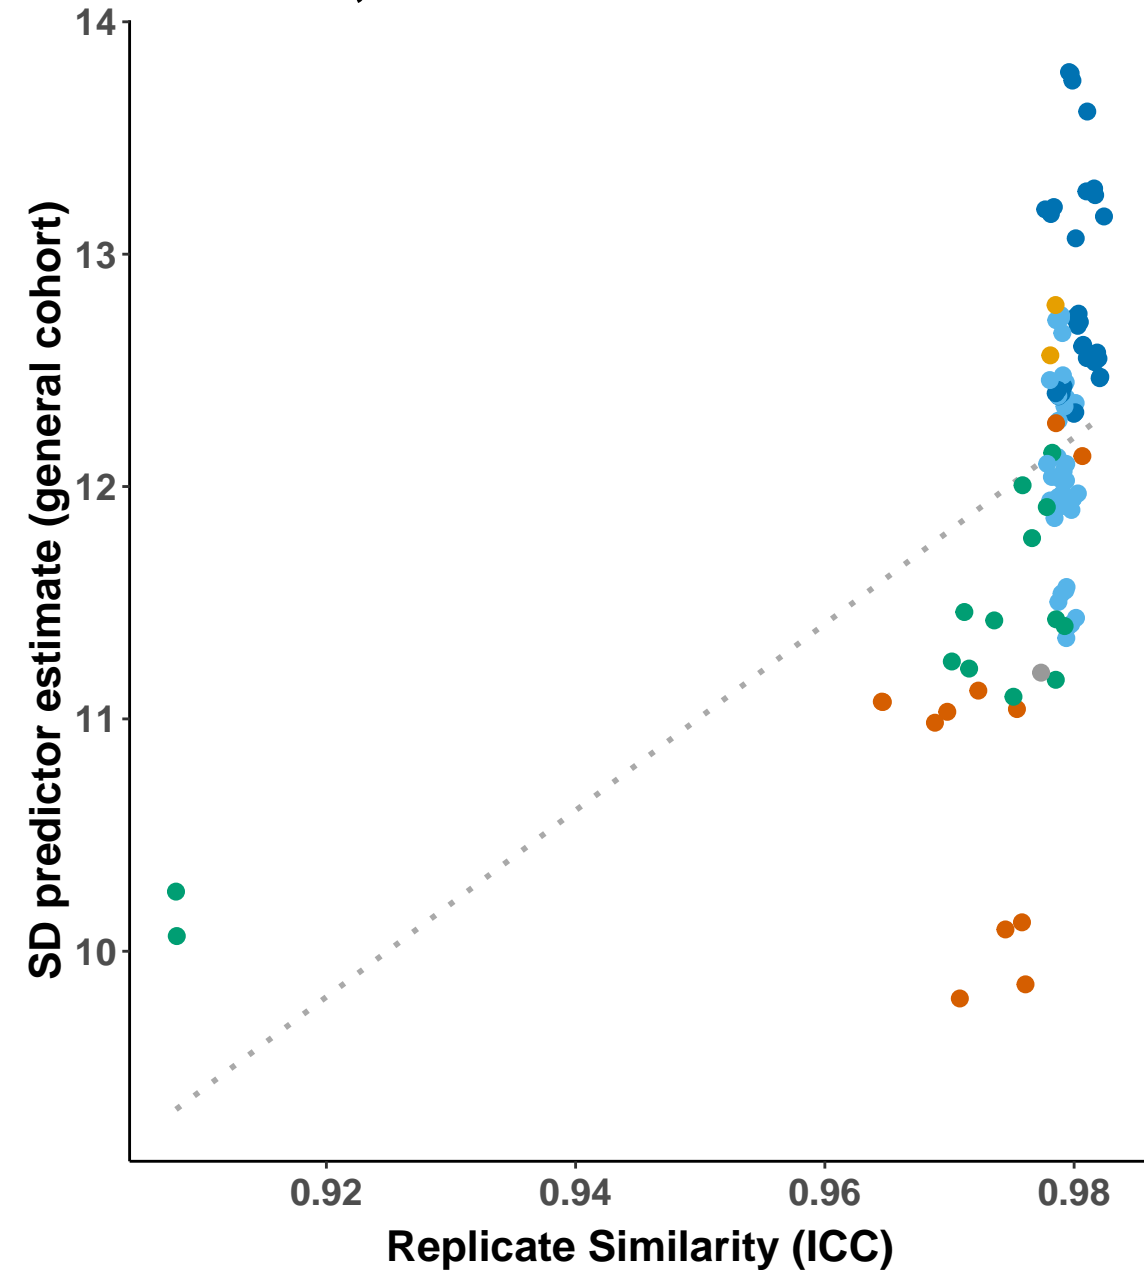

● Raw data    ● ENmix\_RCP    ● Minfi  
● ENmix\_noRCP    ● Hybrid    ● WateRmelon

# ZhangAge

$\rho=0.28$  ,  $P=4.27e-03$

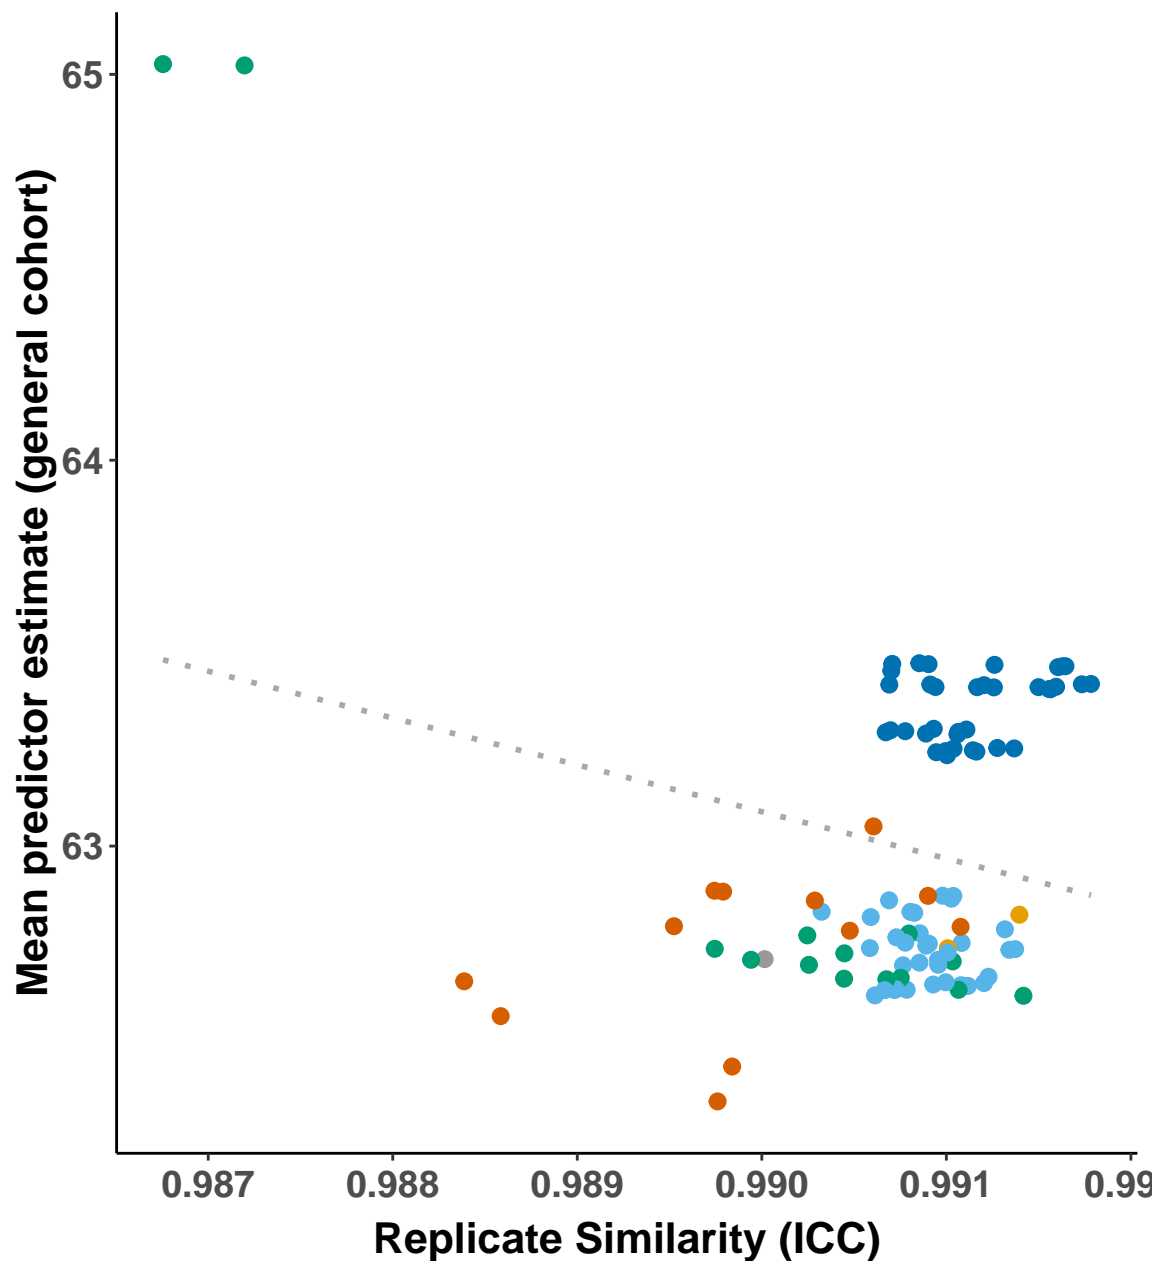

$\rho=0.5$  ,  $P=1.38e-07$

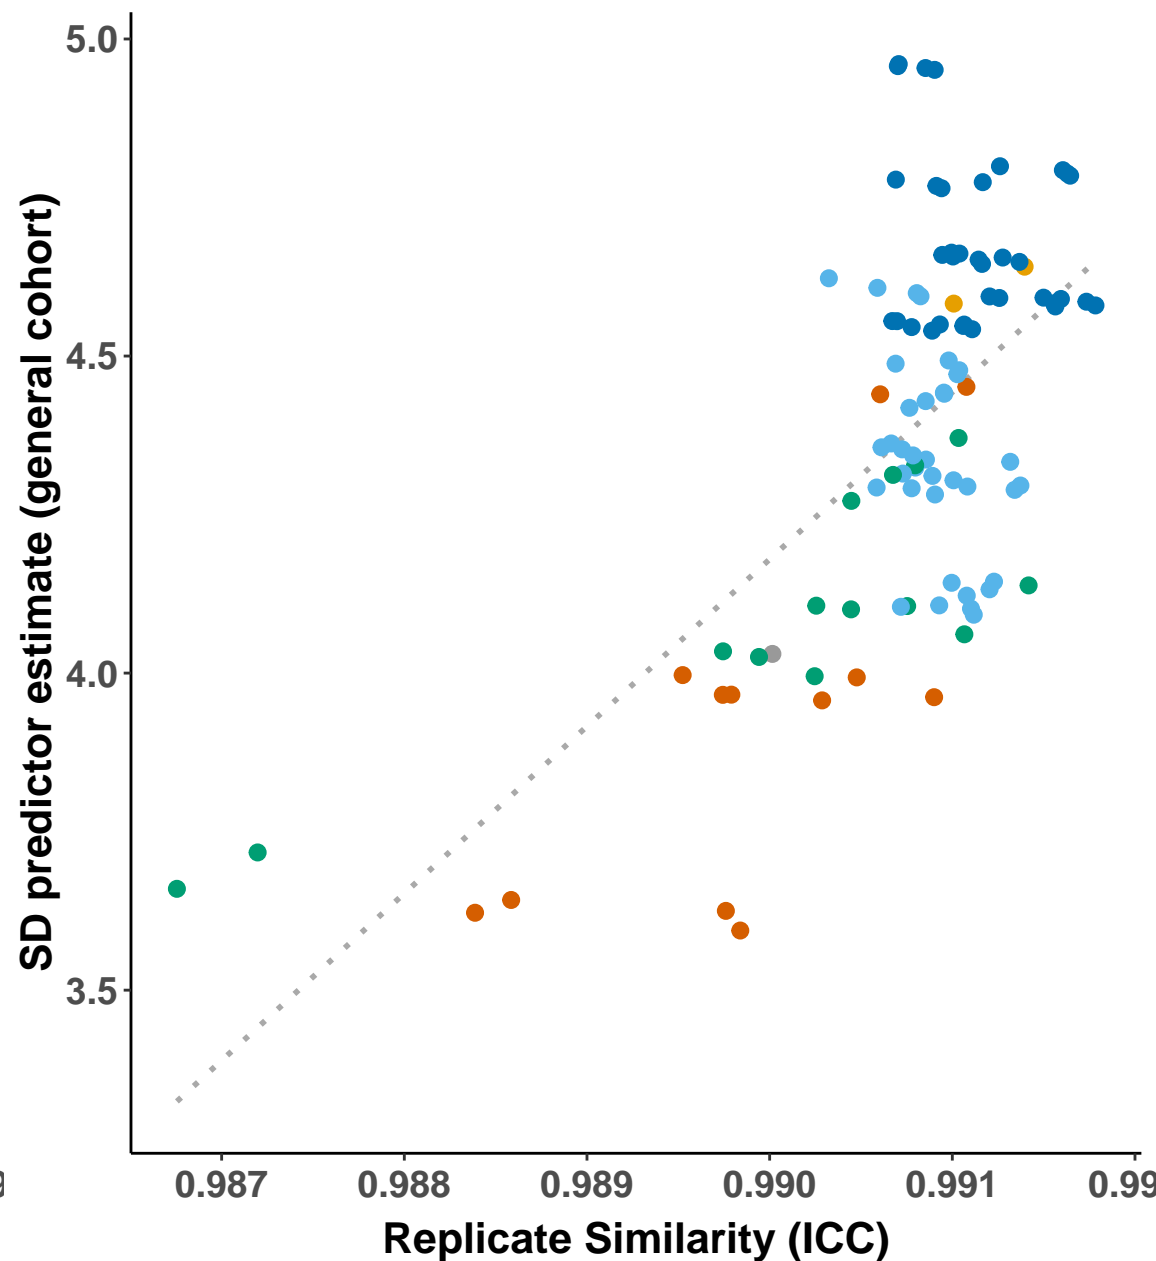

# MiAge

$\rho = -0.54$ ,  $P = 7.63e-09$

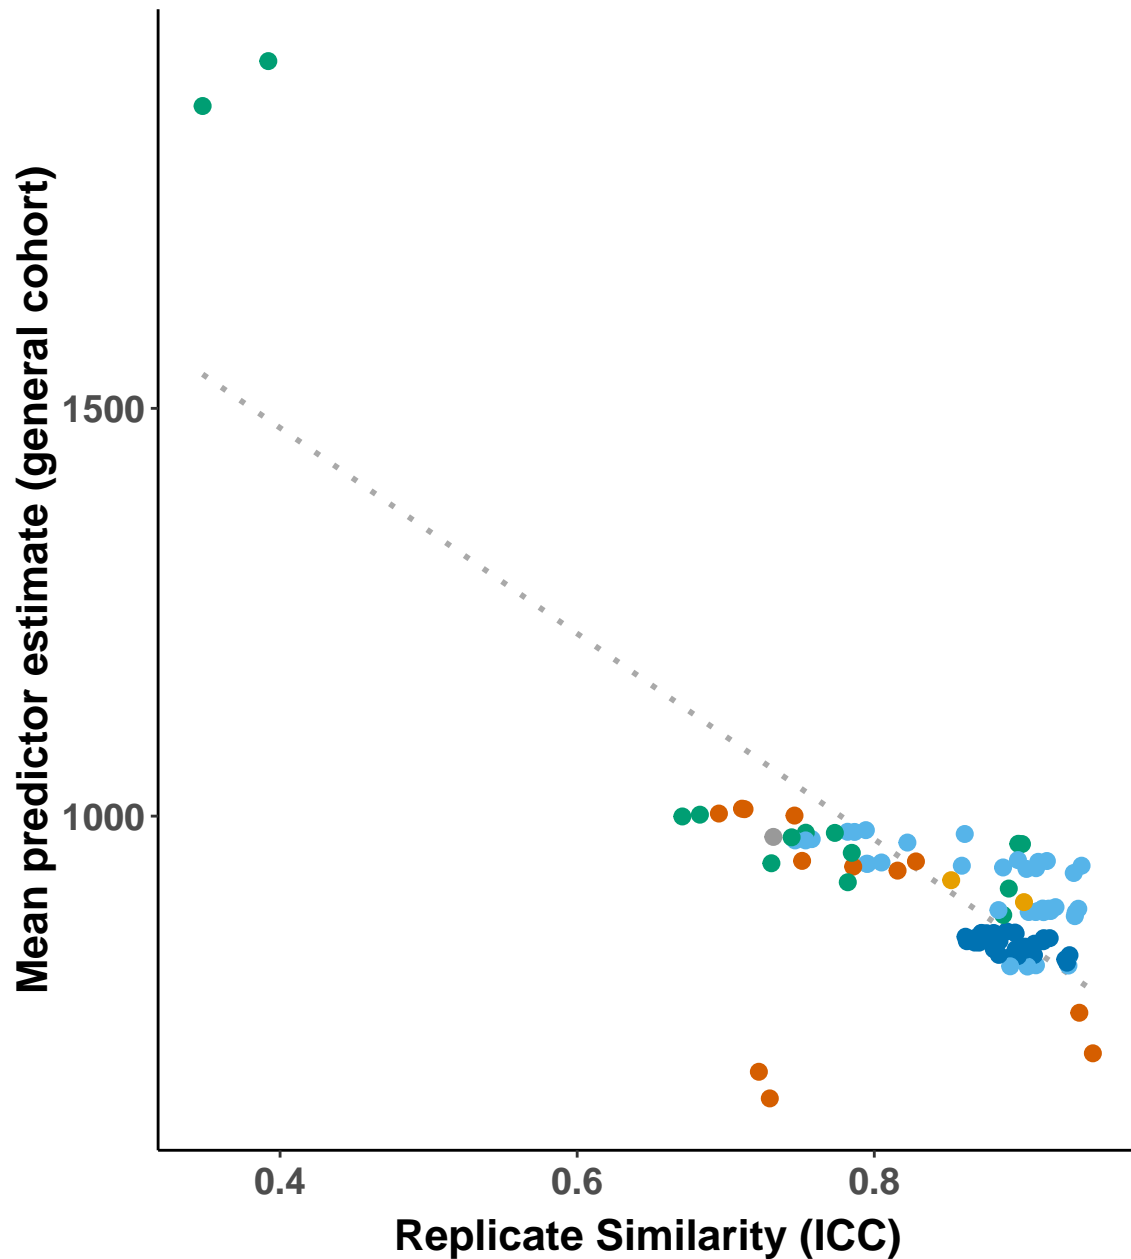

● Raw data    ● ENmix\_RCP    ● Minfi  
● ENmix\_noRCP    ● Hybrid    ● WaterRmelon

$\rho = -0.64$ ,  $P = 0e+00$

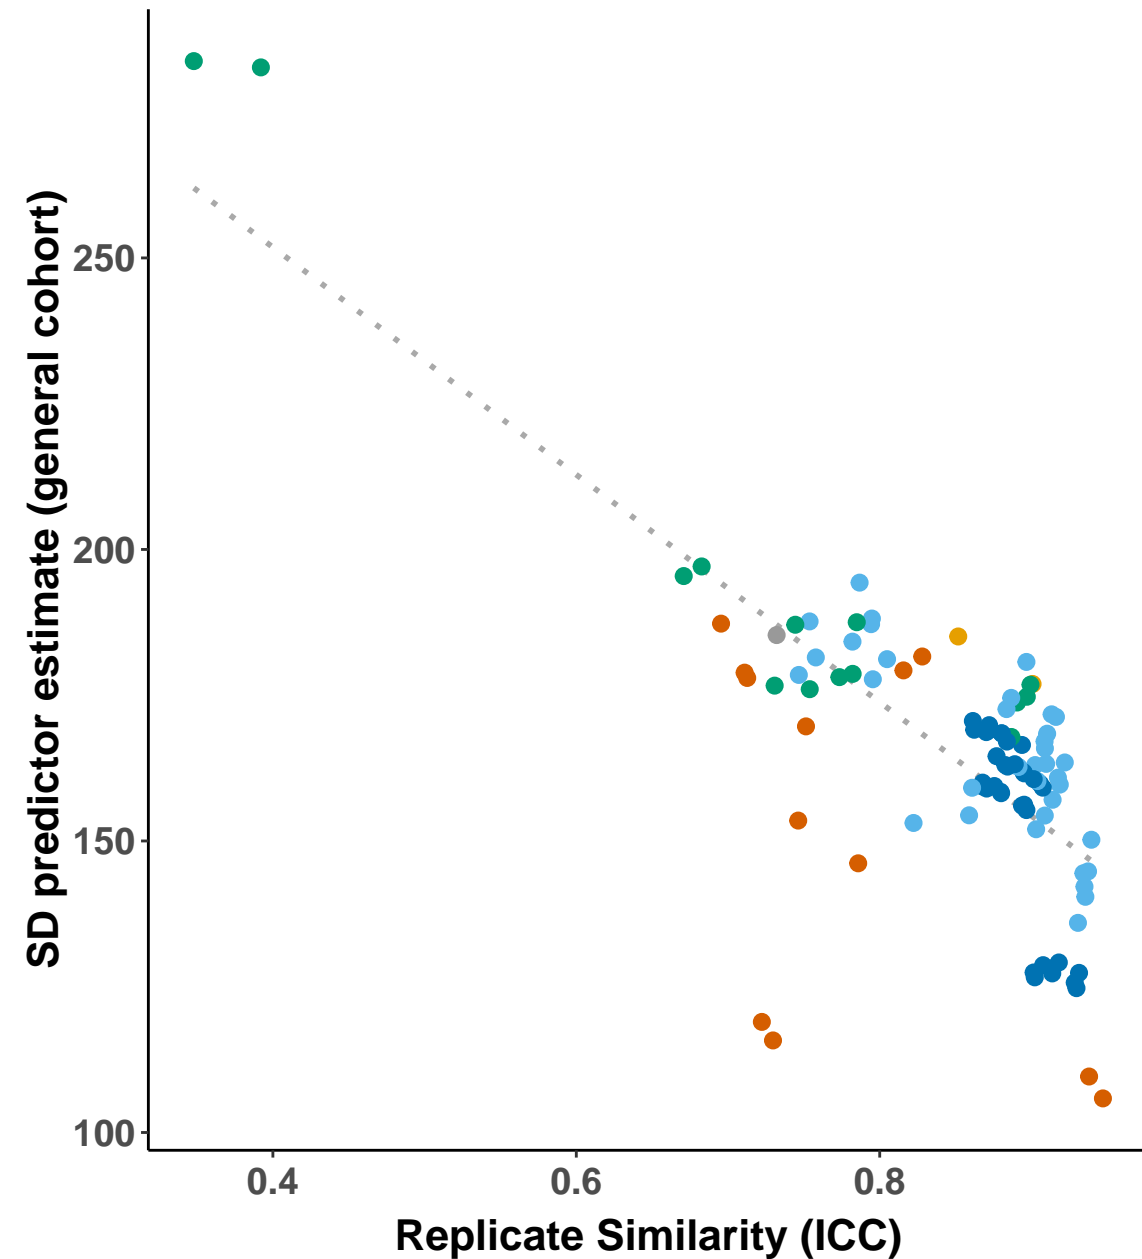

● Raw data    ● ENmix\_RCP    ● Minfi  
● ENmix\_noRCP    ● Hybrid    ● WaterRmelon

epiTOC

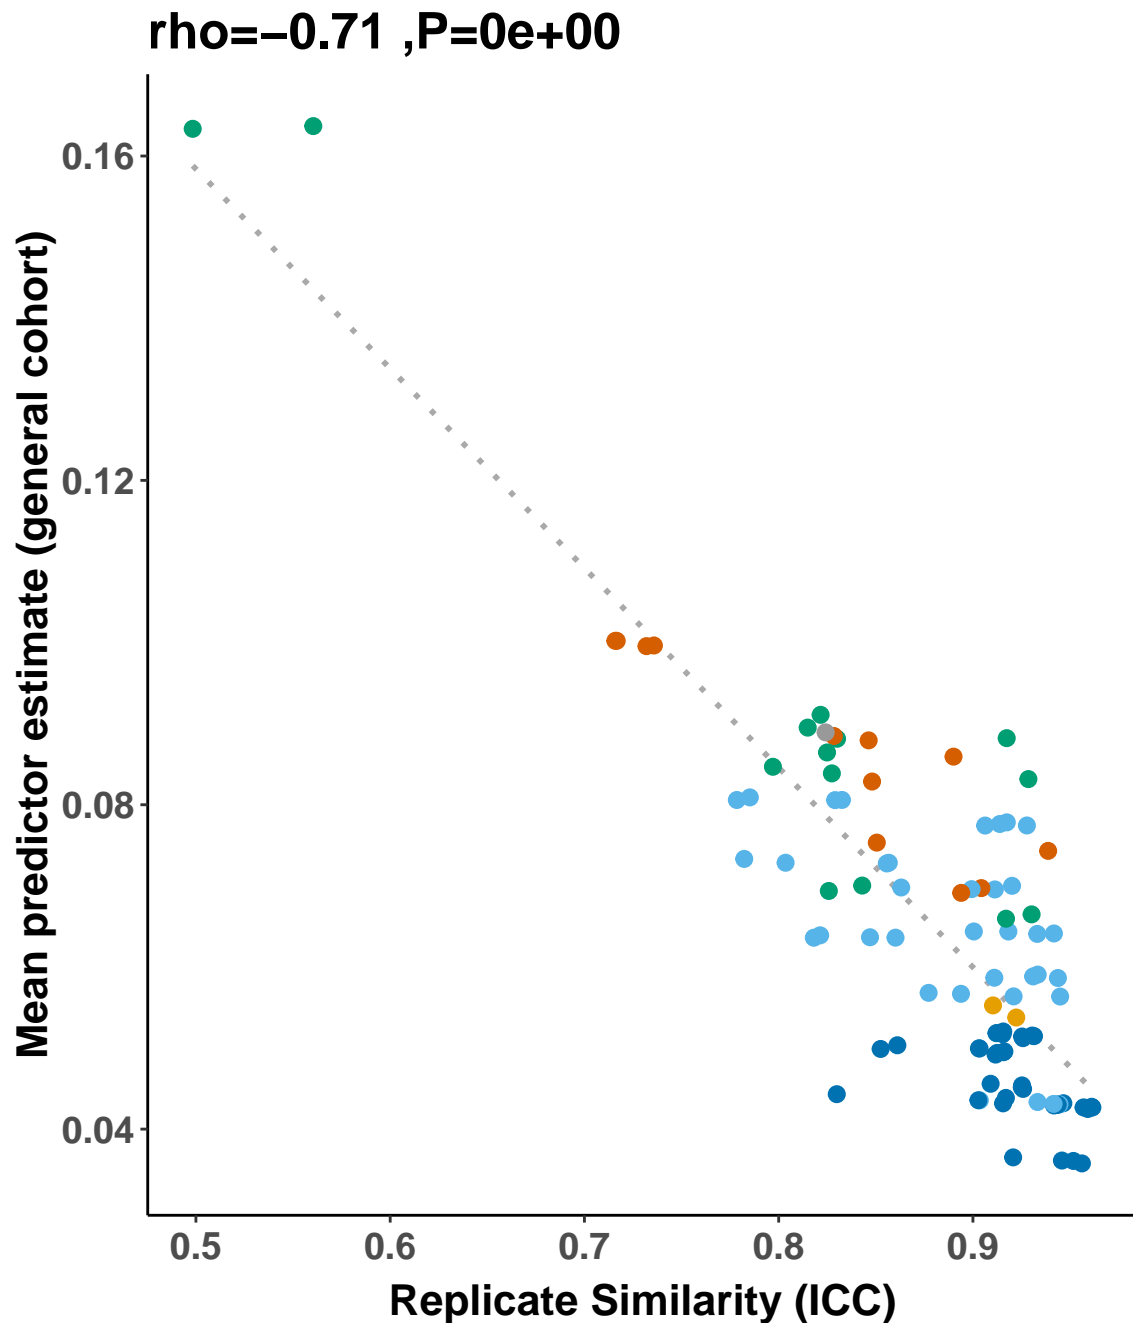

- Raw data
- ENmix\_RCP
- Minfi
- ENmix\_noRCP
- Hybrid
- WaterRmelon

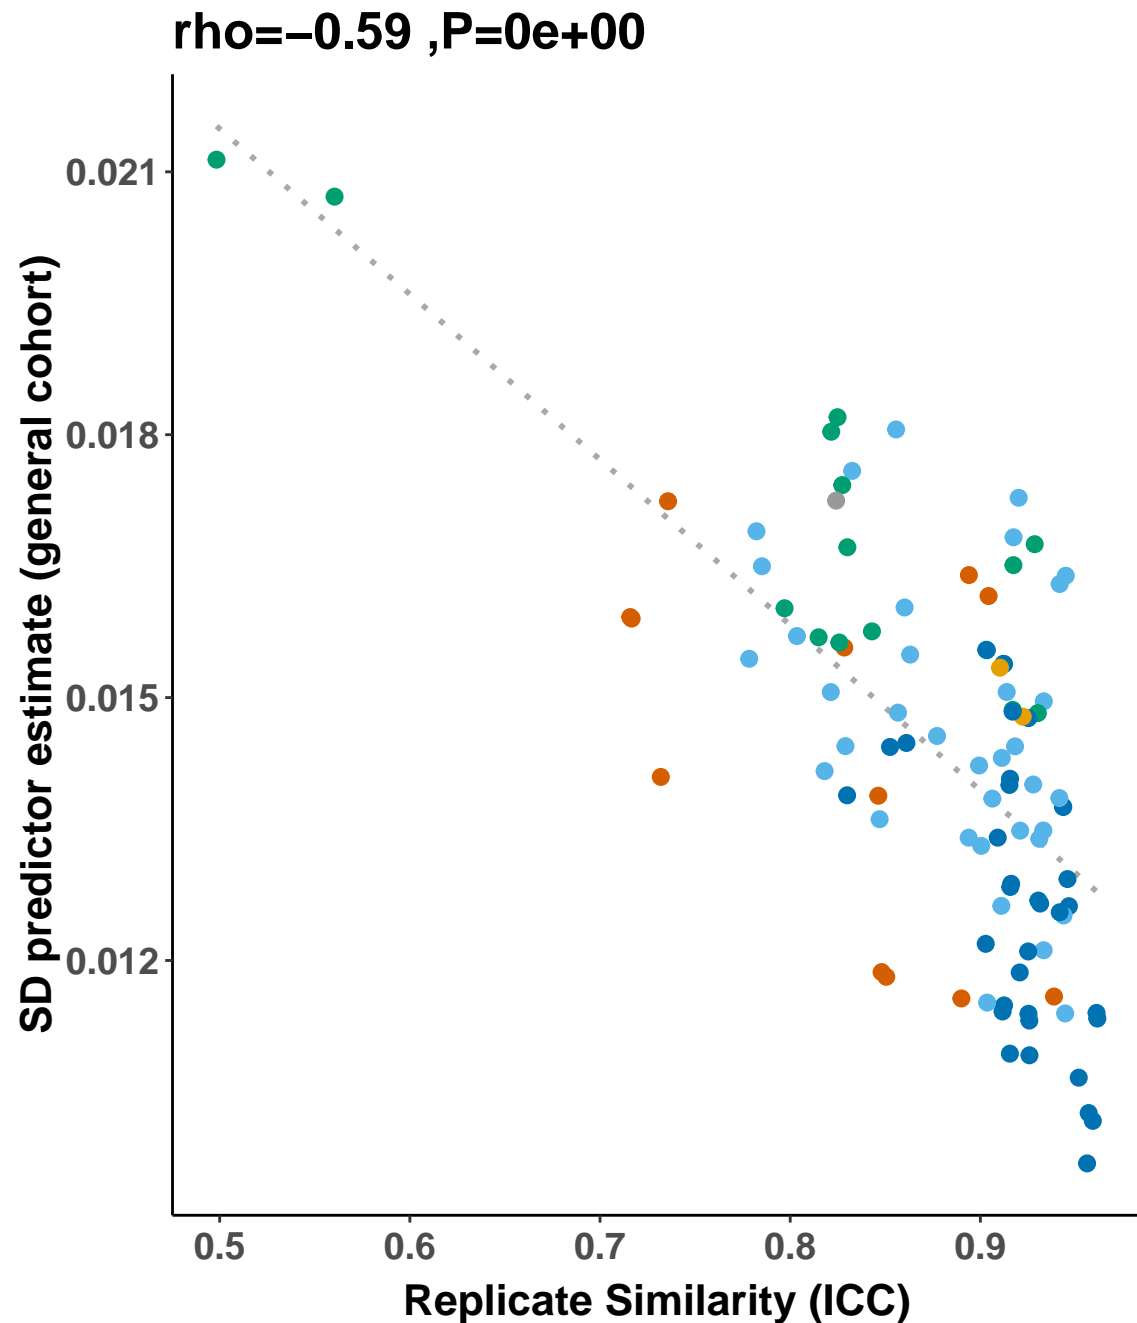

- Raw data
- ENmix\_RCP
- Minfi
- ENmix\_noRCP
- Hybrid
- WaterRmelon

# ZhangMortality

$\rho=0.21$  ,  $P=3.61e-02$

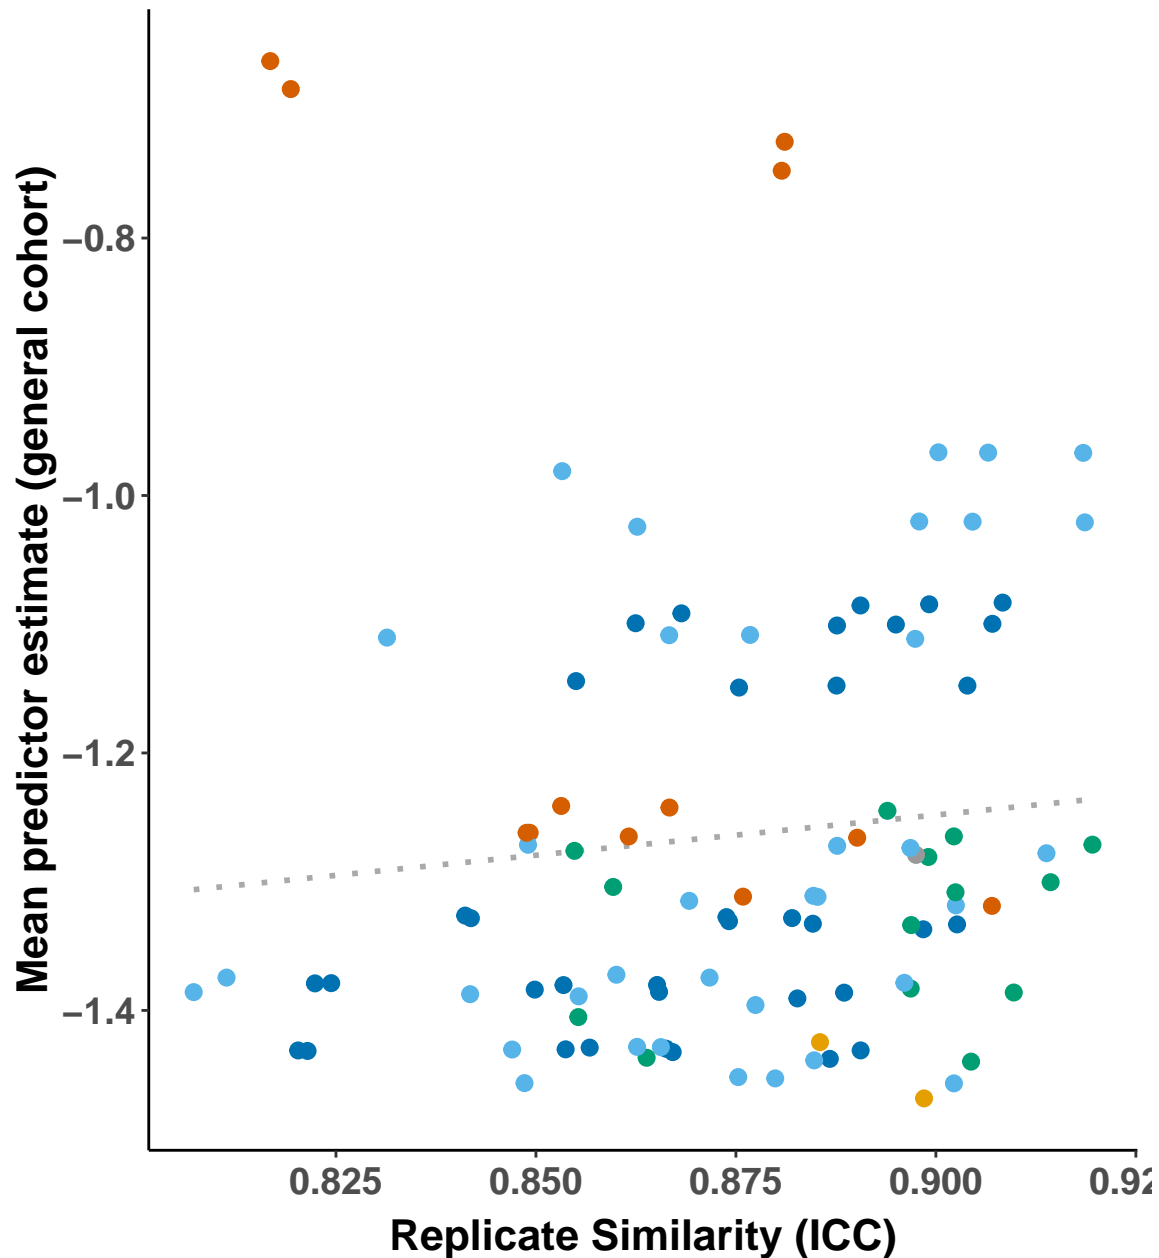

$\rho=0.06$  ,  $P=5.27e-01$

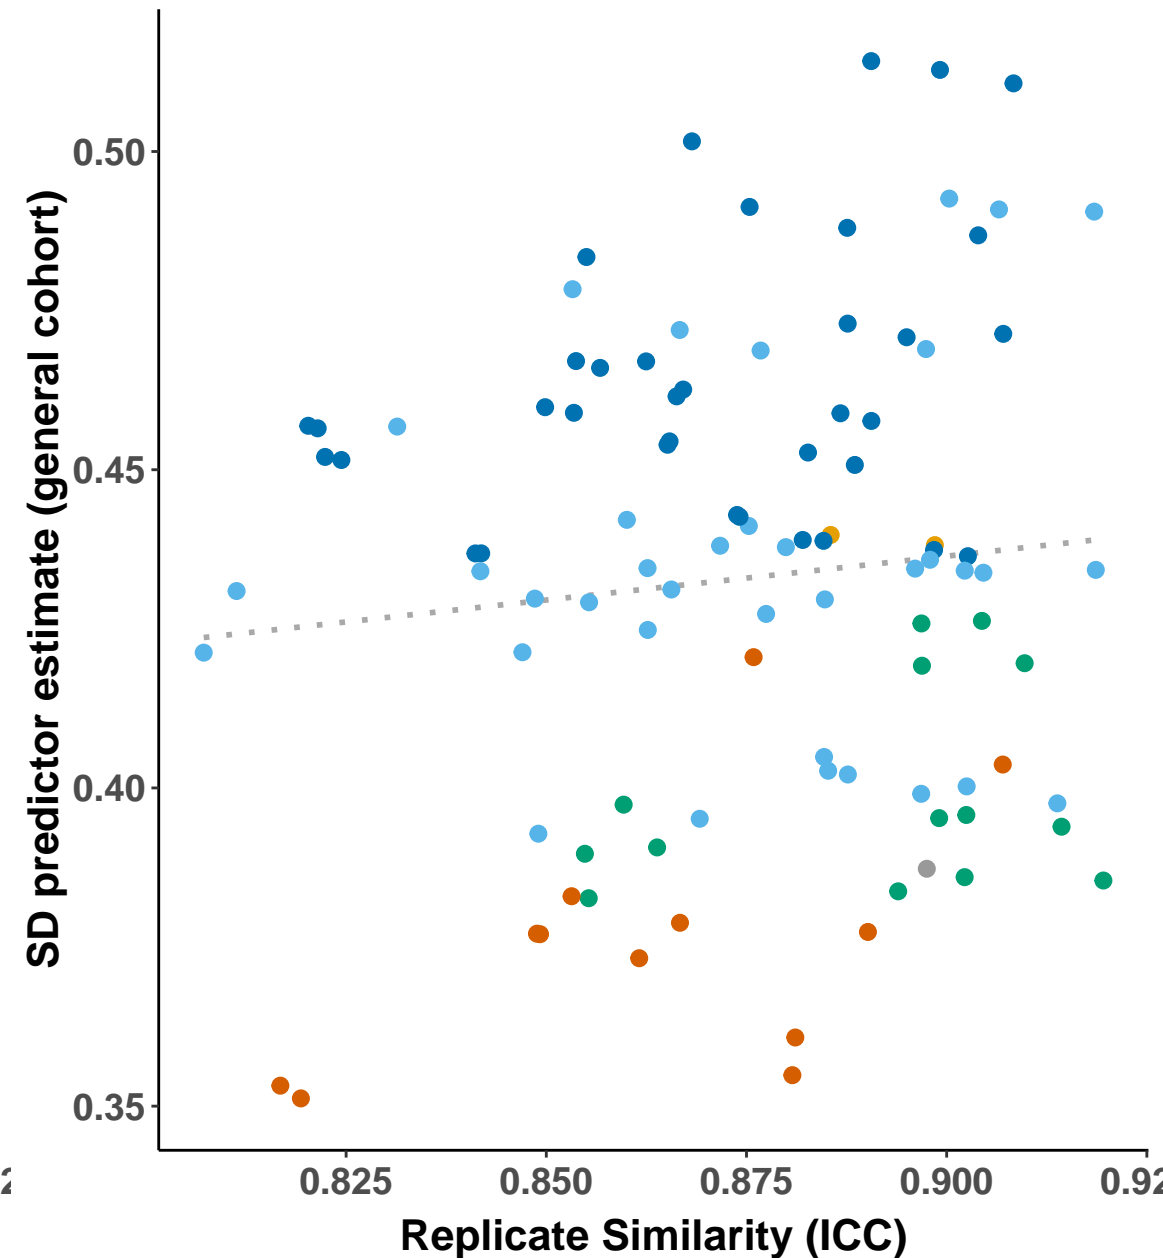



# DNAmTL

$\rho = -0.71$ ,  $P = 0e+00$

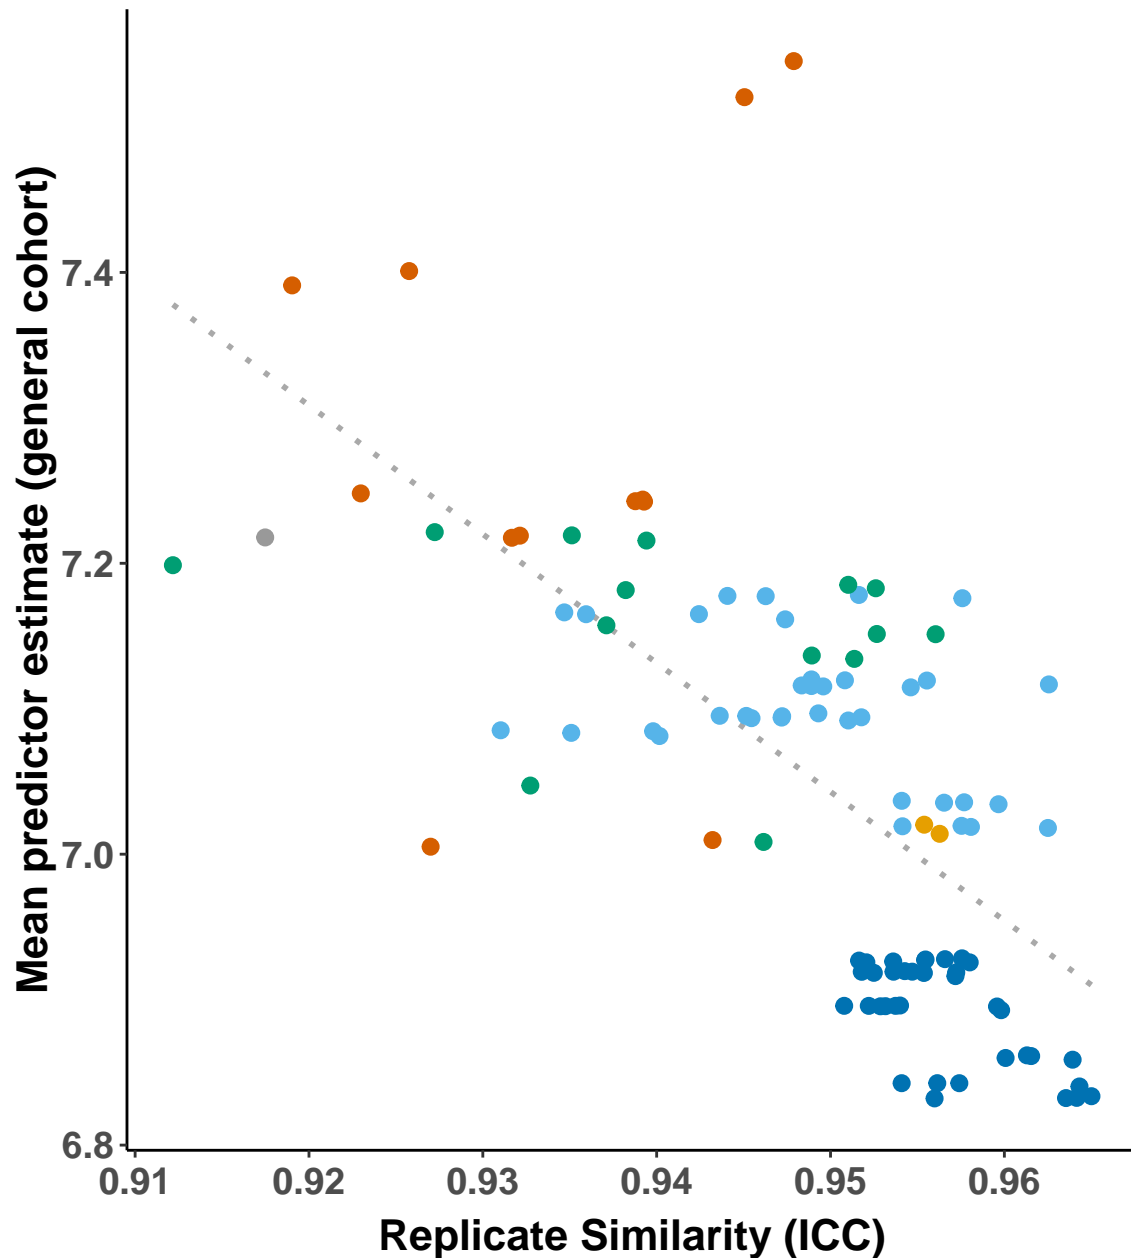

- Raw data
- ENmix\_RCP
- Minfi
- ENmix\_noRCP
- Hybrid
- WaterRmelon

$\rho = 0.79$ ,  $P = 0e+00$

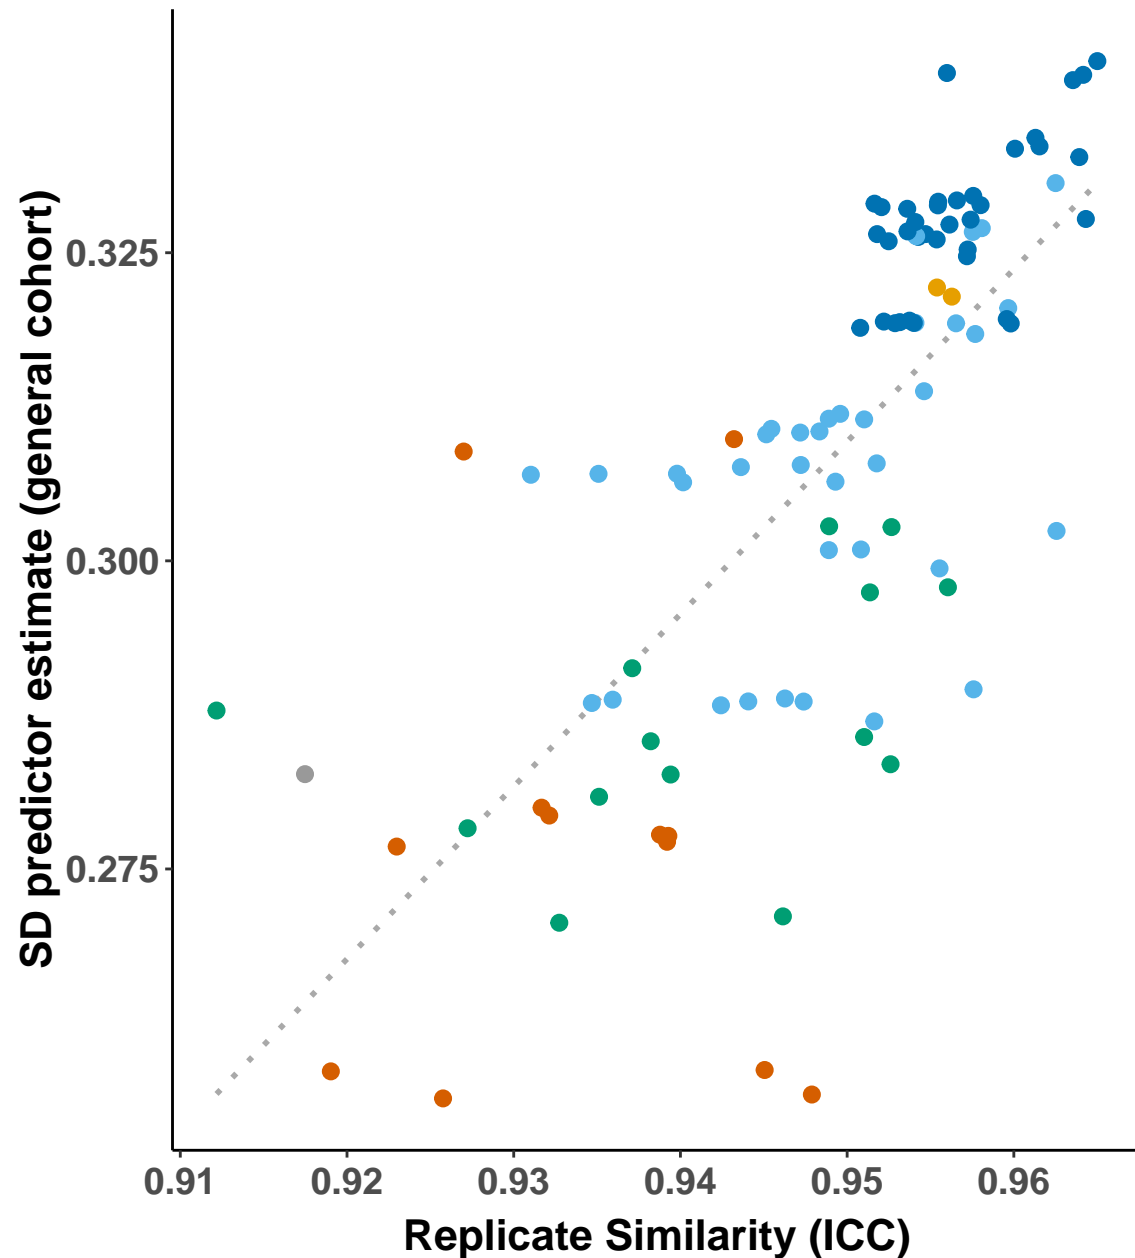

- Raw data
- ENmix\_RCP
- Minfi
- ENmix\_noRCP
- Hybrid
- WaterRmelon

# VidalBraloAge

$\rho = -0.66$ ,  $P = 4.32e-14$

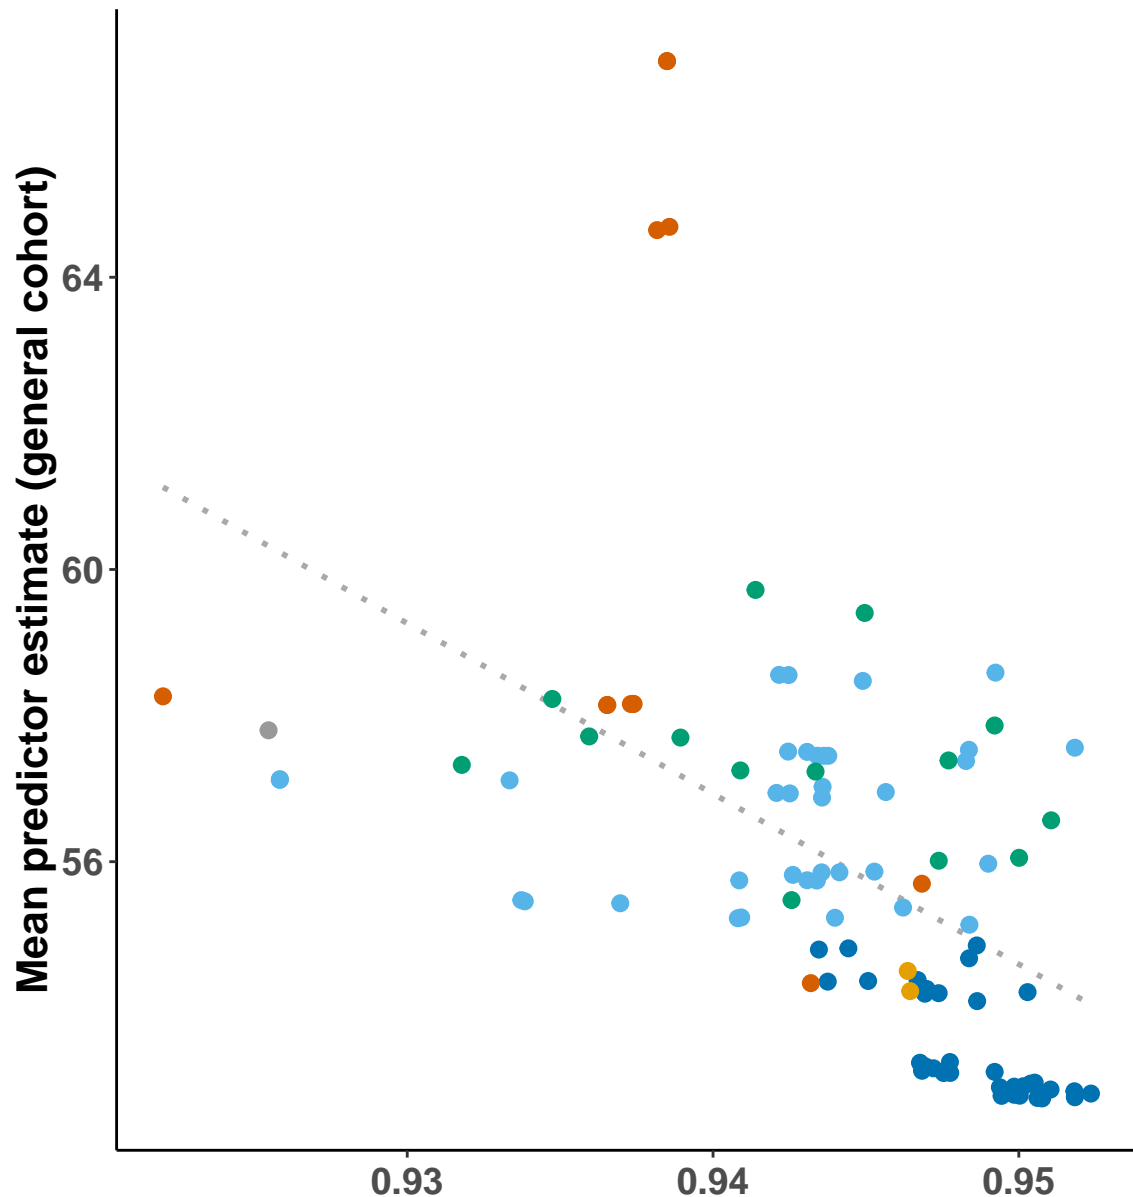

Raw data    
  ENmix\_RCP    
  Minfi  
 ENmix\_noRCP    
  Hybrid    
  WaterRmelon

$\rho = 0.63$ ,  $P = 1.12e-12$

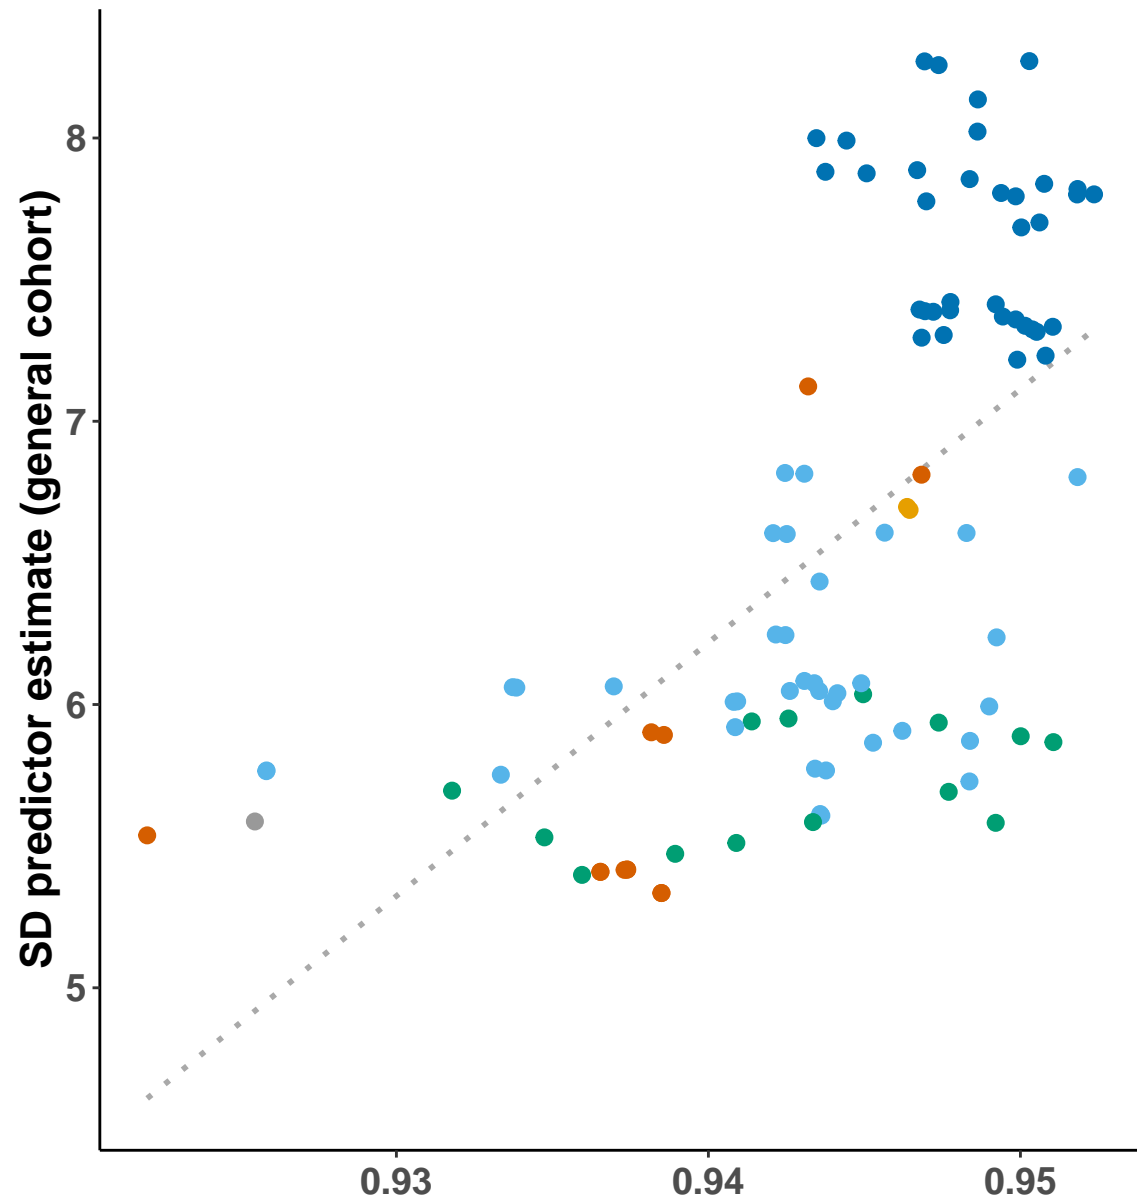

Raw data    
  ENmix\_RCP    
  Minfi  
 ENmix\_noRCP    
  Hybrid    
  WaterRmelon

LinAge

$\rho = -0.38$ ,  $P = 1.19 \times 10^{-4}$

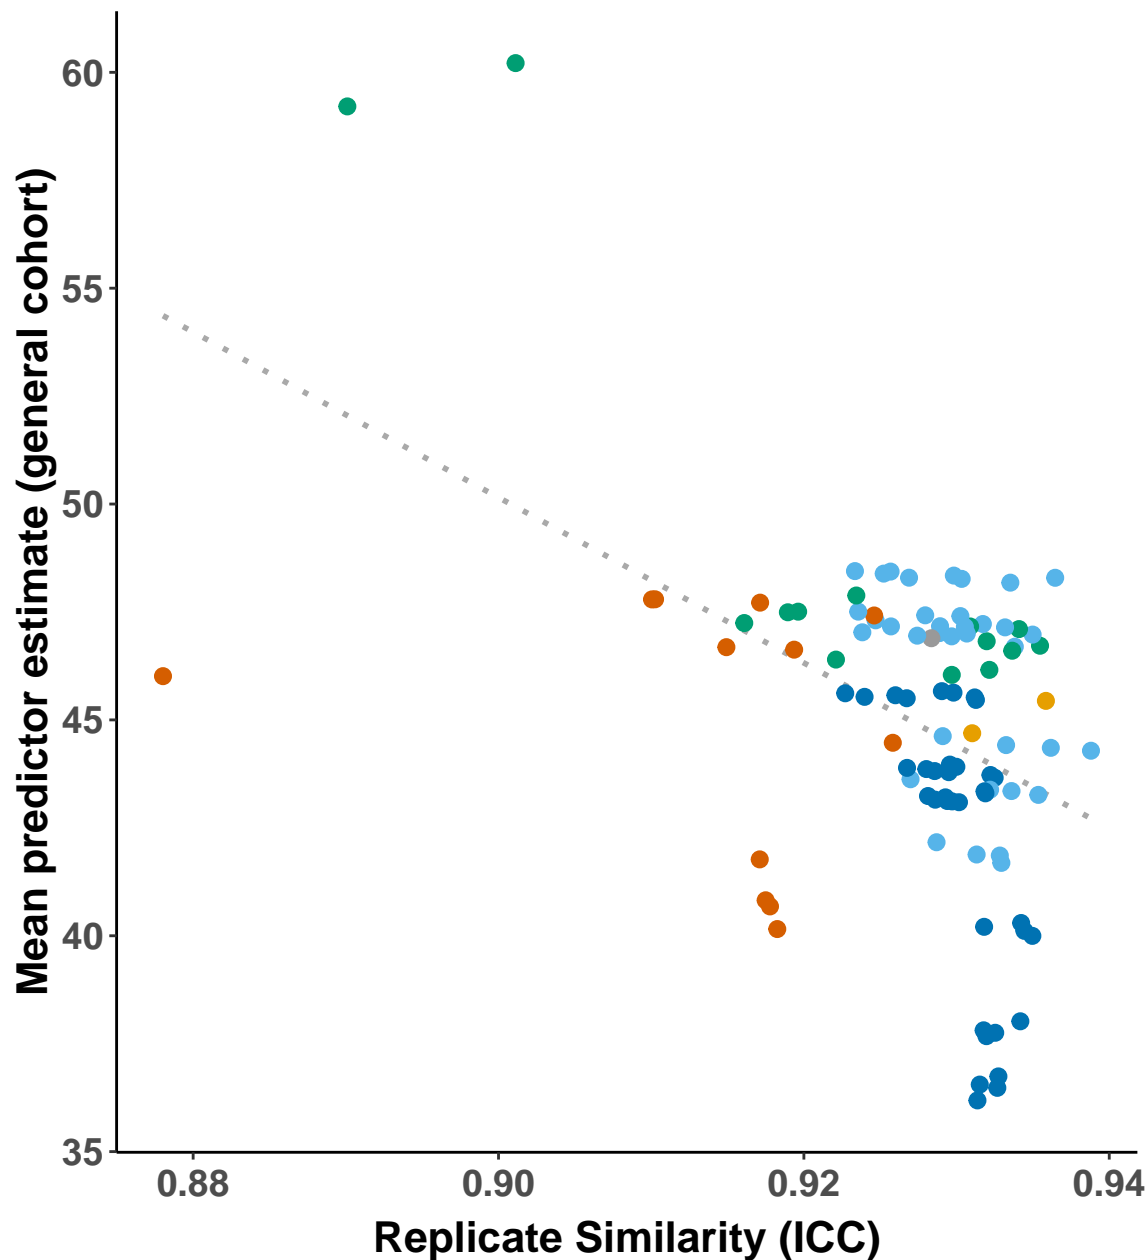

$\rho = 0.45$ ,  $P = 3.62 \times 10^{-6}$

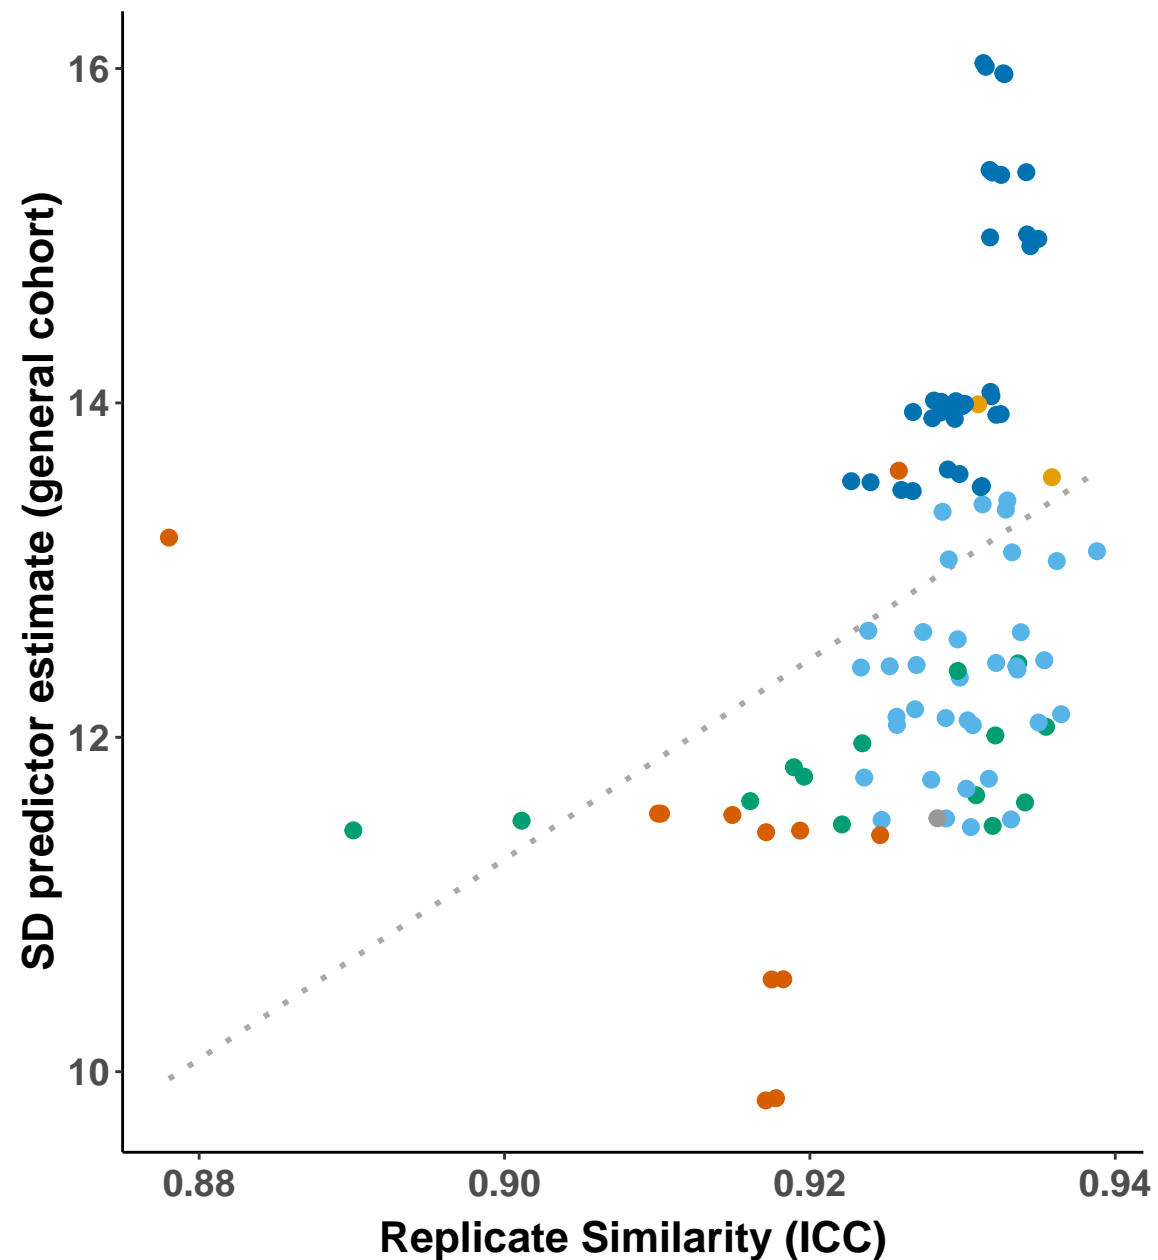

## WeidnerAge

 $\rho = -0.35$ ,  $P = 3.18e-04$ 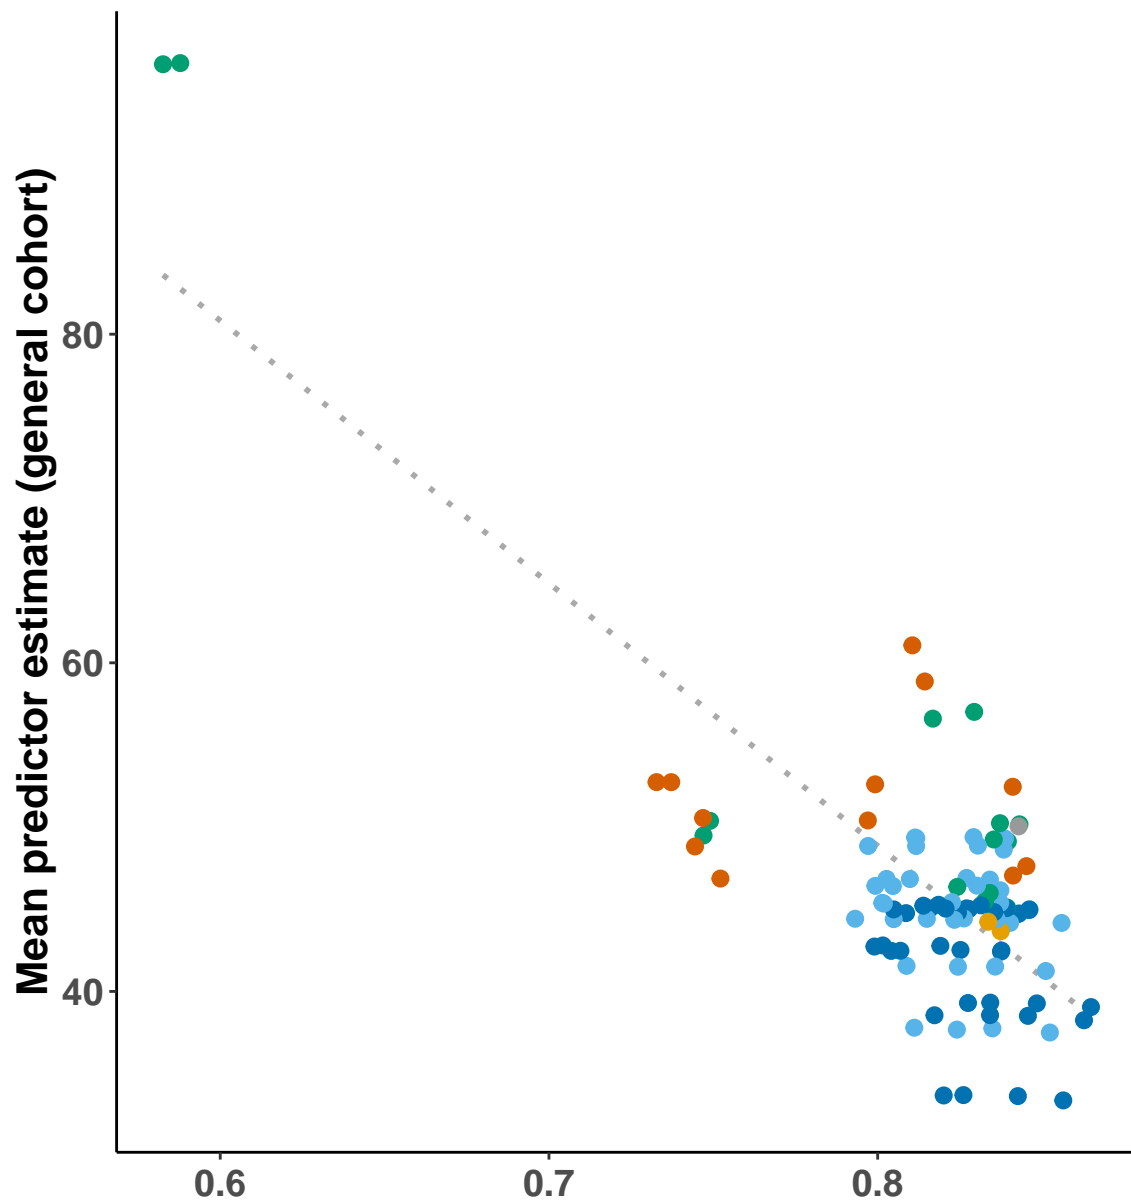

● Raw data    ● ENmix\_RCP    ● Minfi  
● ENmix\_noRCP    ● Hybrid    ● WaterRmelon

 $\rho = 0.37$ ,  $P = 1.52e-04$ 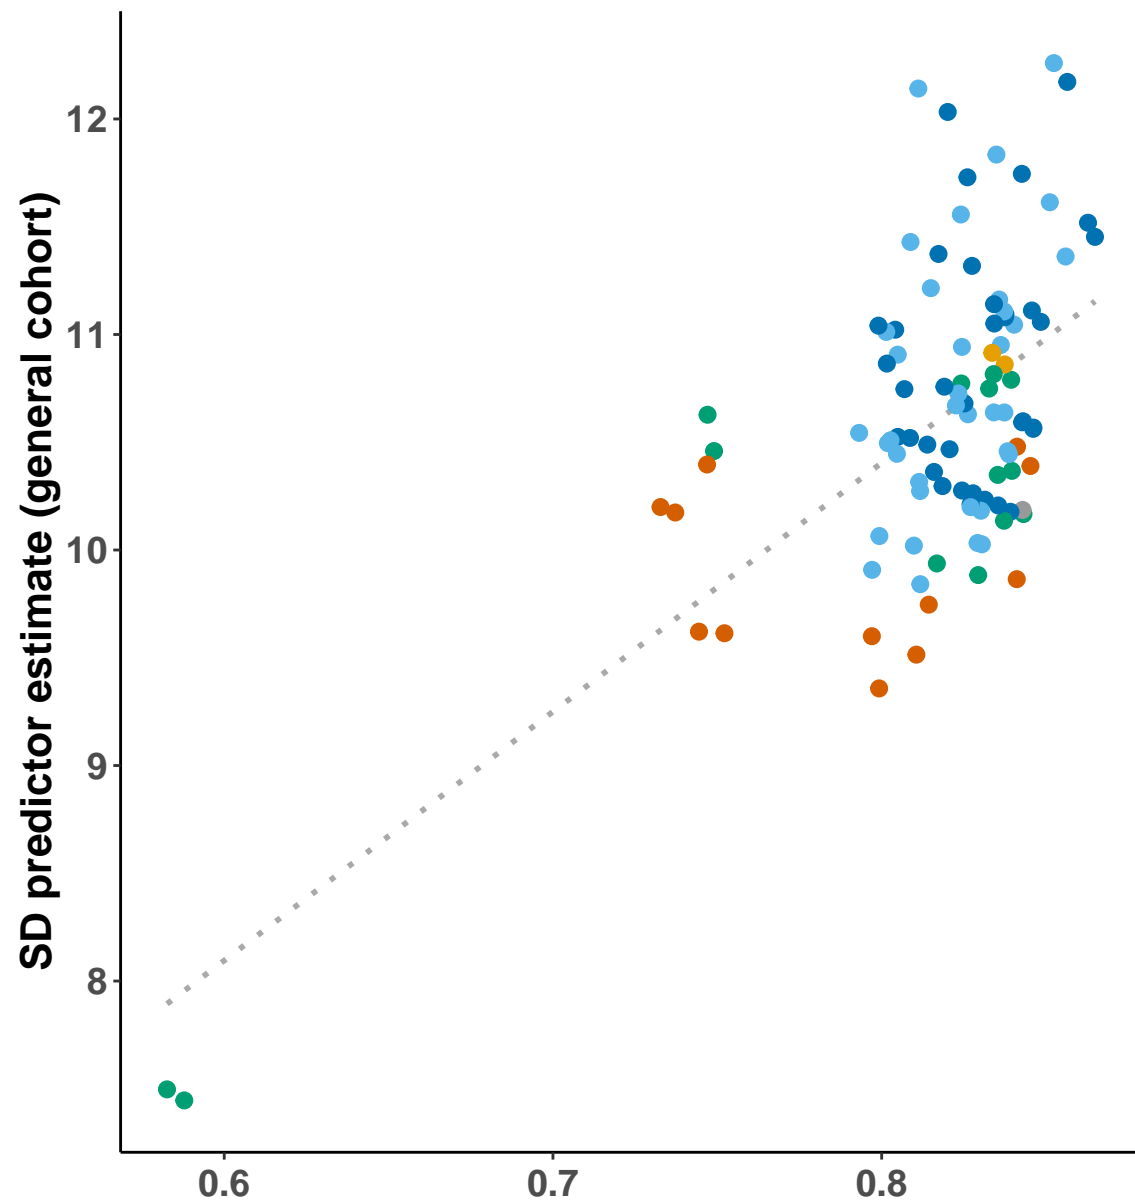

● Raw data    ● ENmix\_RCP    ● Minfi  
● ENmix\_noRCP    ● Hybrid    ● WaterRmelon

# Alcohol

$\rho = -0.7$ ,  $P = 0e+00$

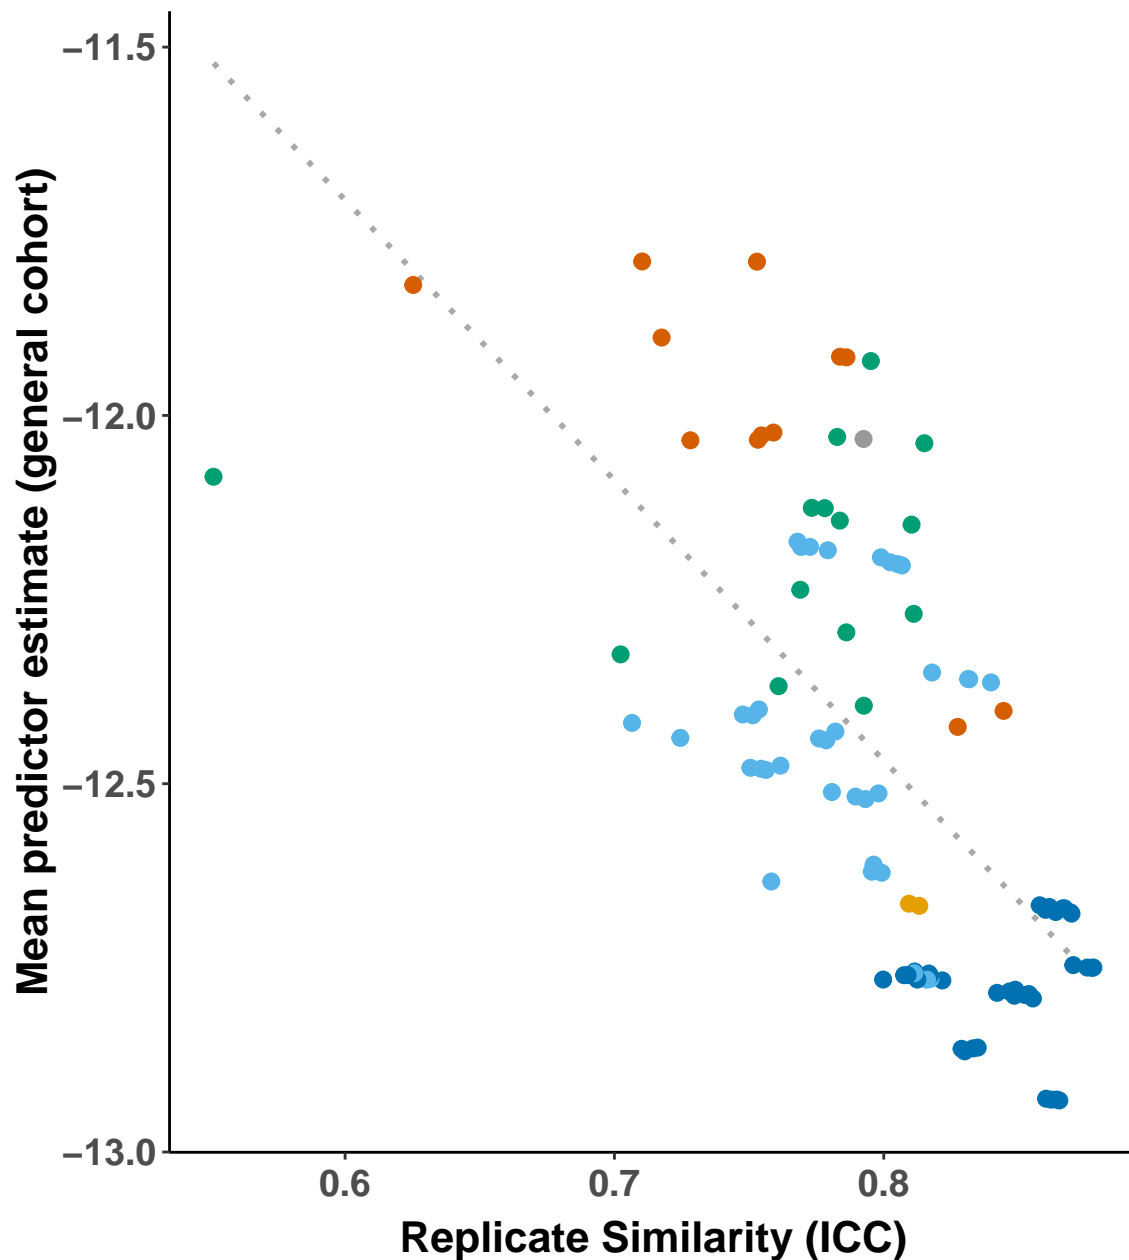

● Raw data    ● ENmix\_RCP    ● Minfi  
● ENmix\_noRCP    ● Hybrid    ● WaterRmelon

$\rho = 0.5$ ,  $P = 1.19e-07$

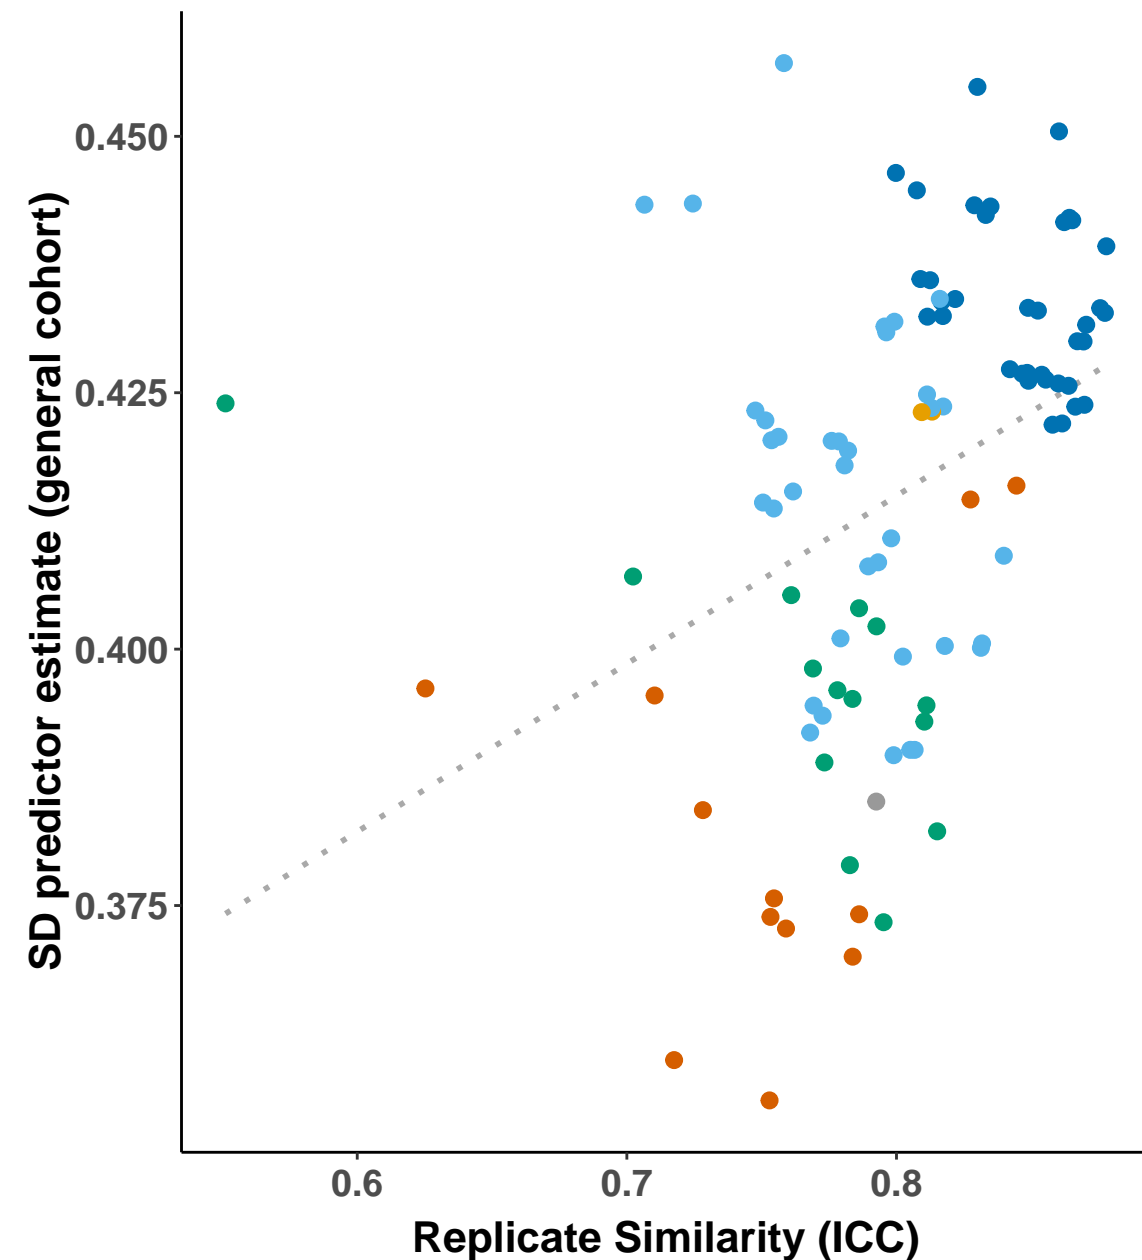

● Raw data    ● ENmix\_RCP    ● Minfi  
● ENmix\_noRCP    ● Hybrid    ● WaterRmelon

# BMI

$\rho=0.28$ ,  $P=4.13e-03$

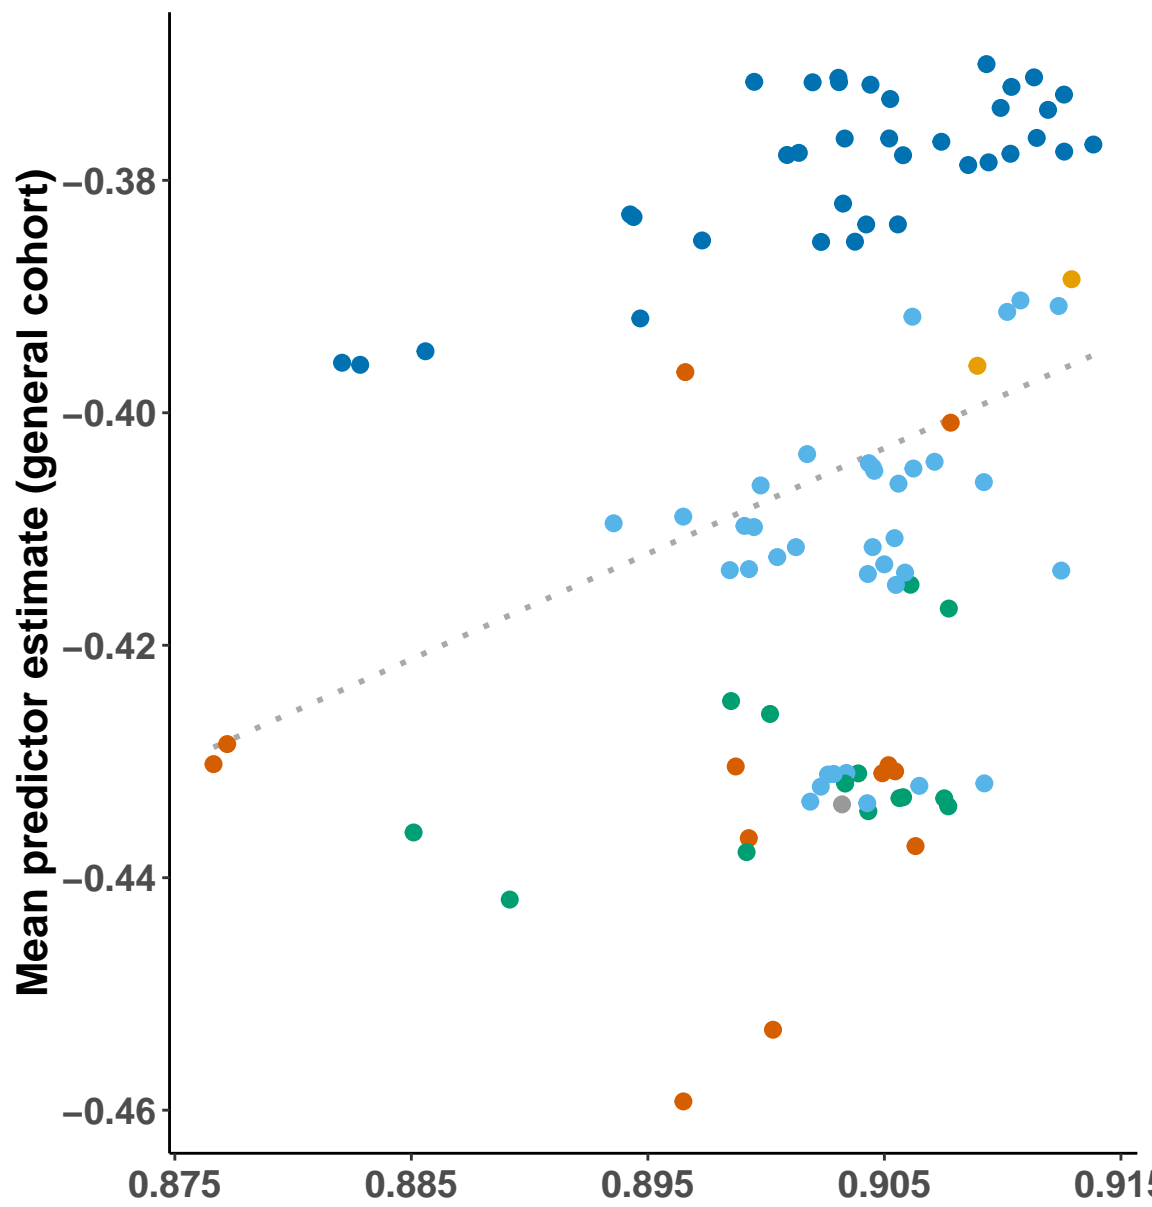

- Raw data
- ENmix\_RCP
- Minfi
- ENmix\_noRCP
- Hybrid
- WaterRmelon

$\rho=0.07$ ,  $P=4.96e-01$

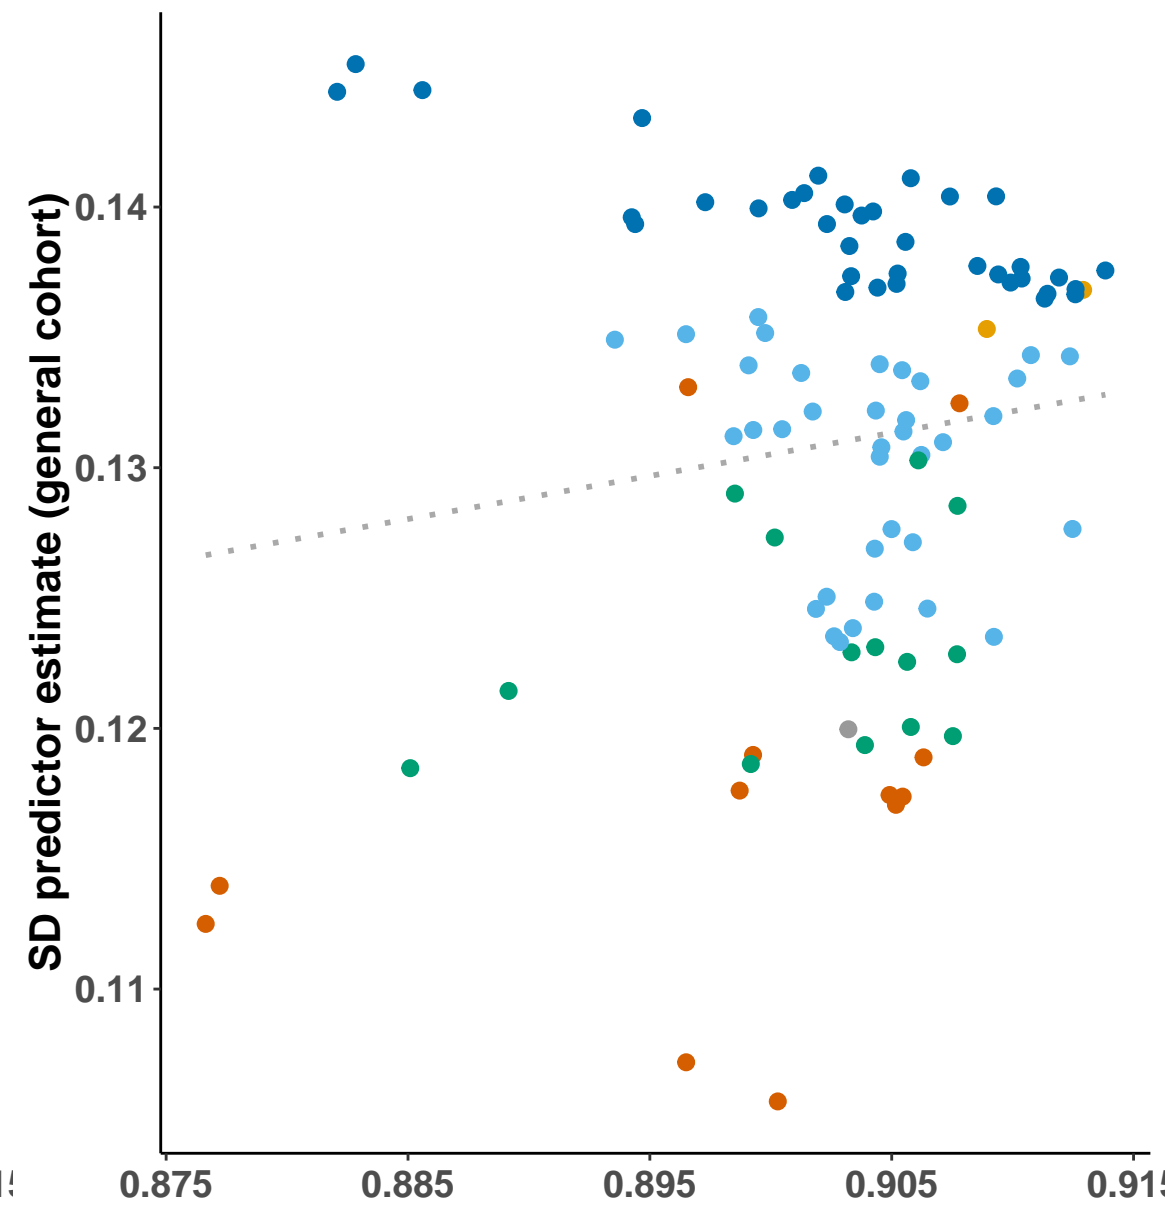

- Raw data
- ENmix\_RCP
- Minfi
- ENmix\_noRCP
- Hybrid
- WaterRmelon

# BodyFat

$\rho=0.85$  ,  $P=0e+00$

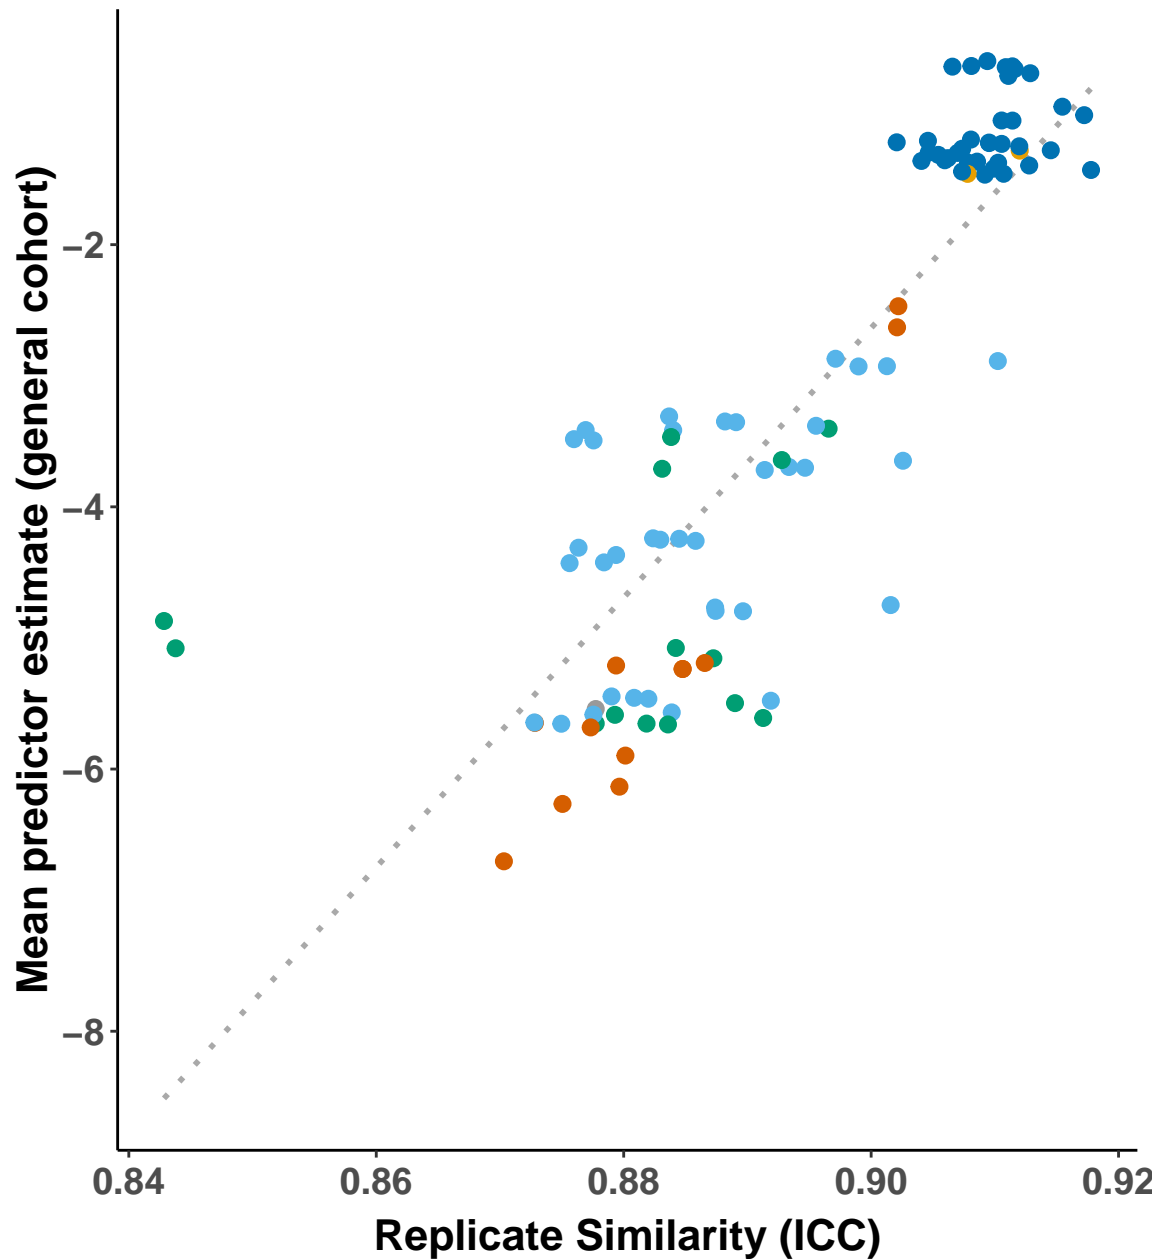

- Raw data
- ENmix\_RCP
- Minfi
- ENmix\_noRCP
- Hybrid
- WaterRmelon

$\rho=0.77$  ,  $P=0e+00$

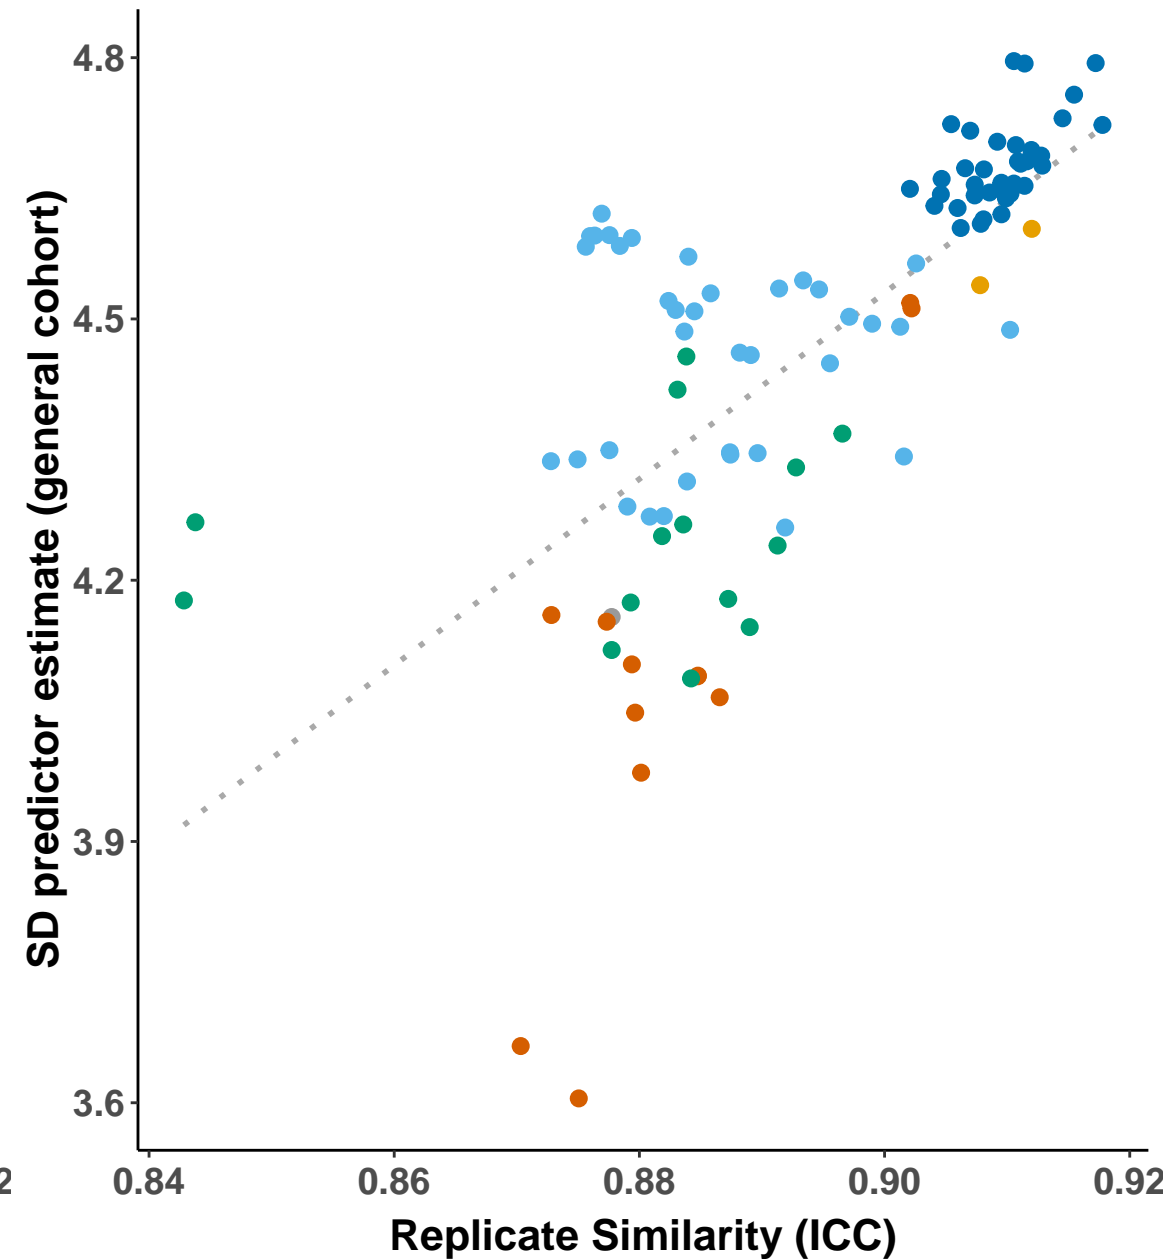

- Raw data
- ENmix\_RCP
- Minfi
- ENmix\_noRCP
- Hybrid
- WaterRmelon

# Cholesterol

$\rho = -0.28$ ,  $P = 5.42e-03$

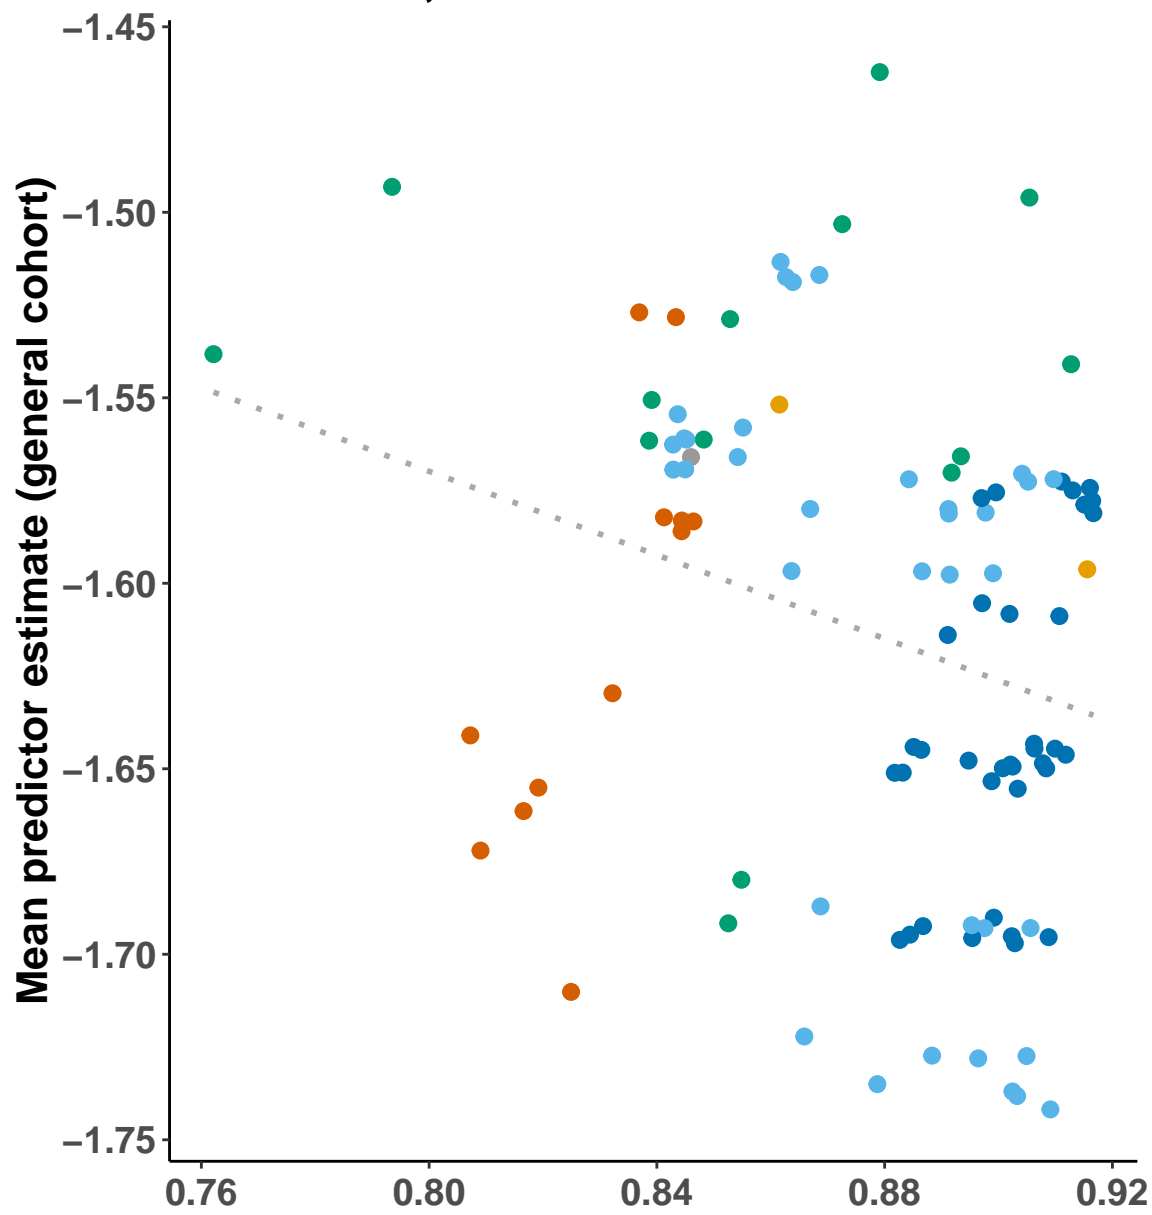

- Raw data
- ENmix\_RCP
- Minfi
- ENmix\_noRCP
- Hybrid
- WaterRmelon

$\rho = 0.58$ ,  $P = 0e+00$

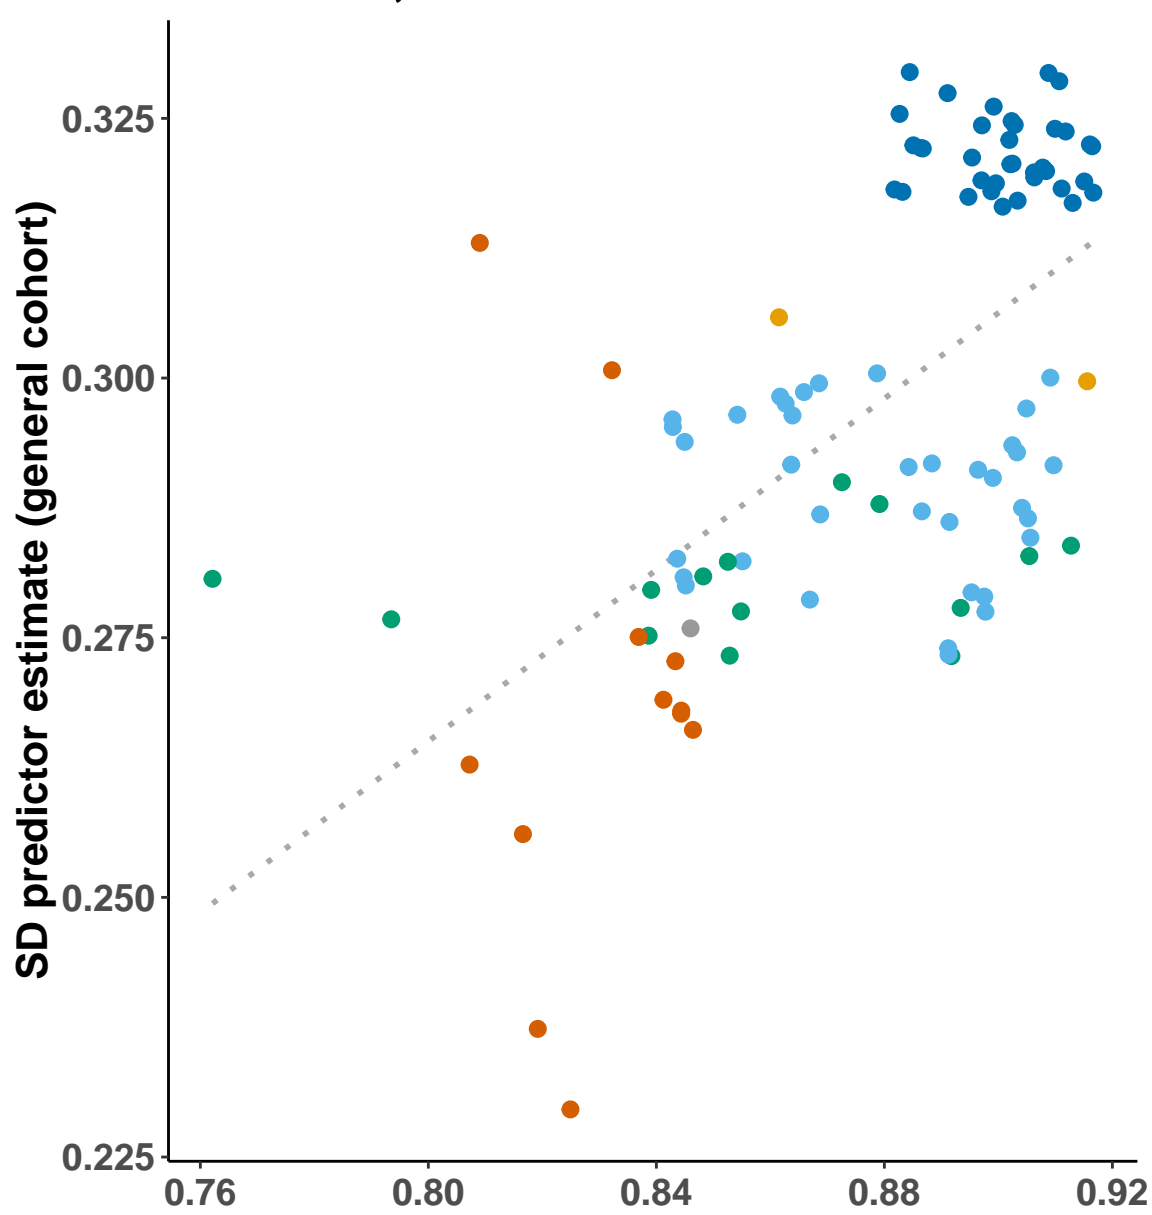

- Raw data
- ENmix\_RCP
- Minfi
- ENmix\_noRCP
- Hybrid
- WaterRmelon



# Education

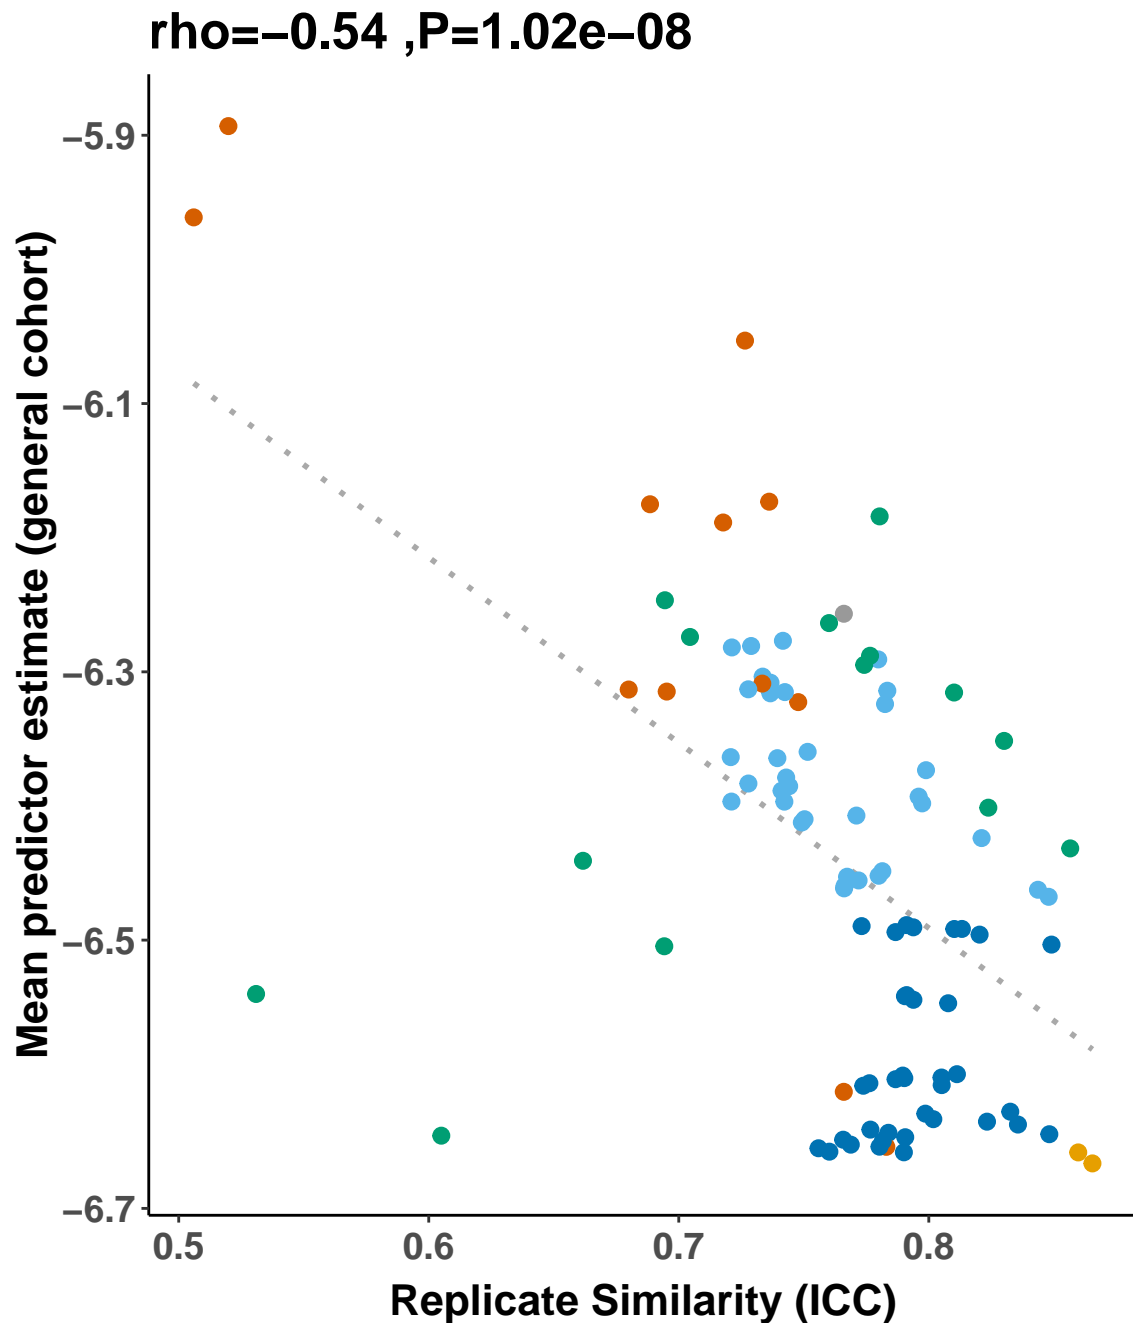

- Raw data
- ENmix\_RCP
- Minfi
- ENmix\_noRCP
- Hybrid
- WaterRmelon

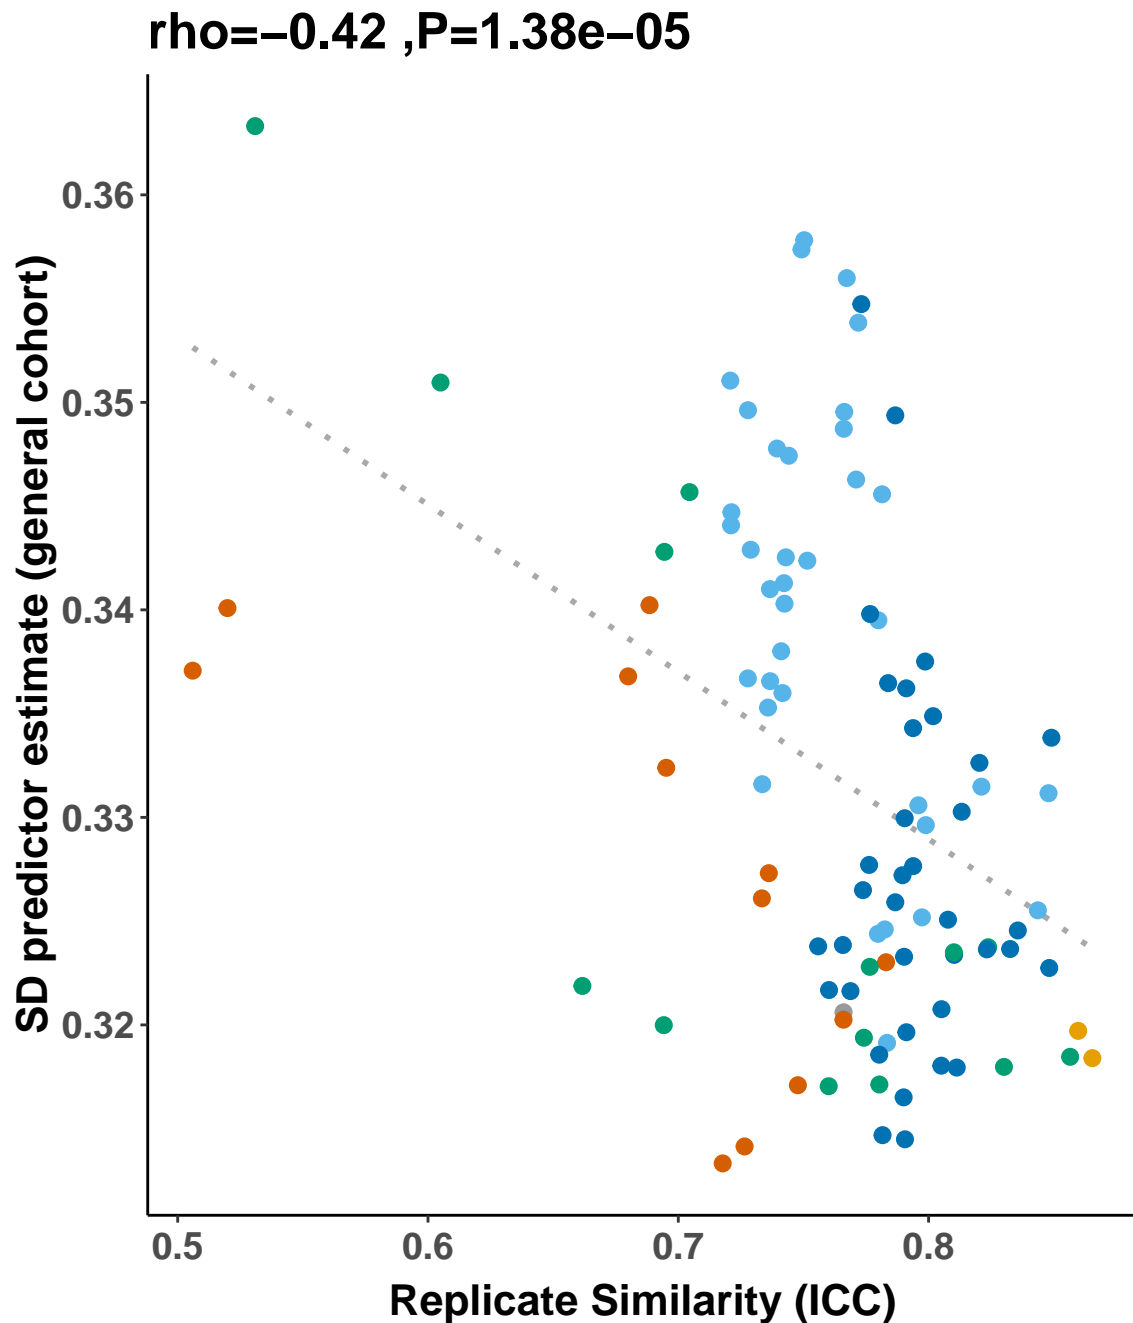

- Raw data
- ENmix\_RCP
- Minfi
- ENmix\_noRCP
- Hybrid
- WaterRmelon

# HDL

$\rho = -0.68$ ,  $P = 0e+00$

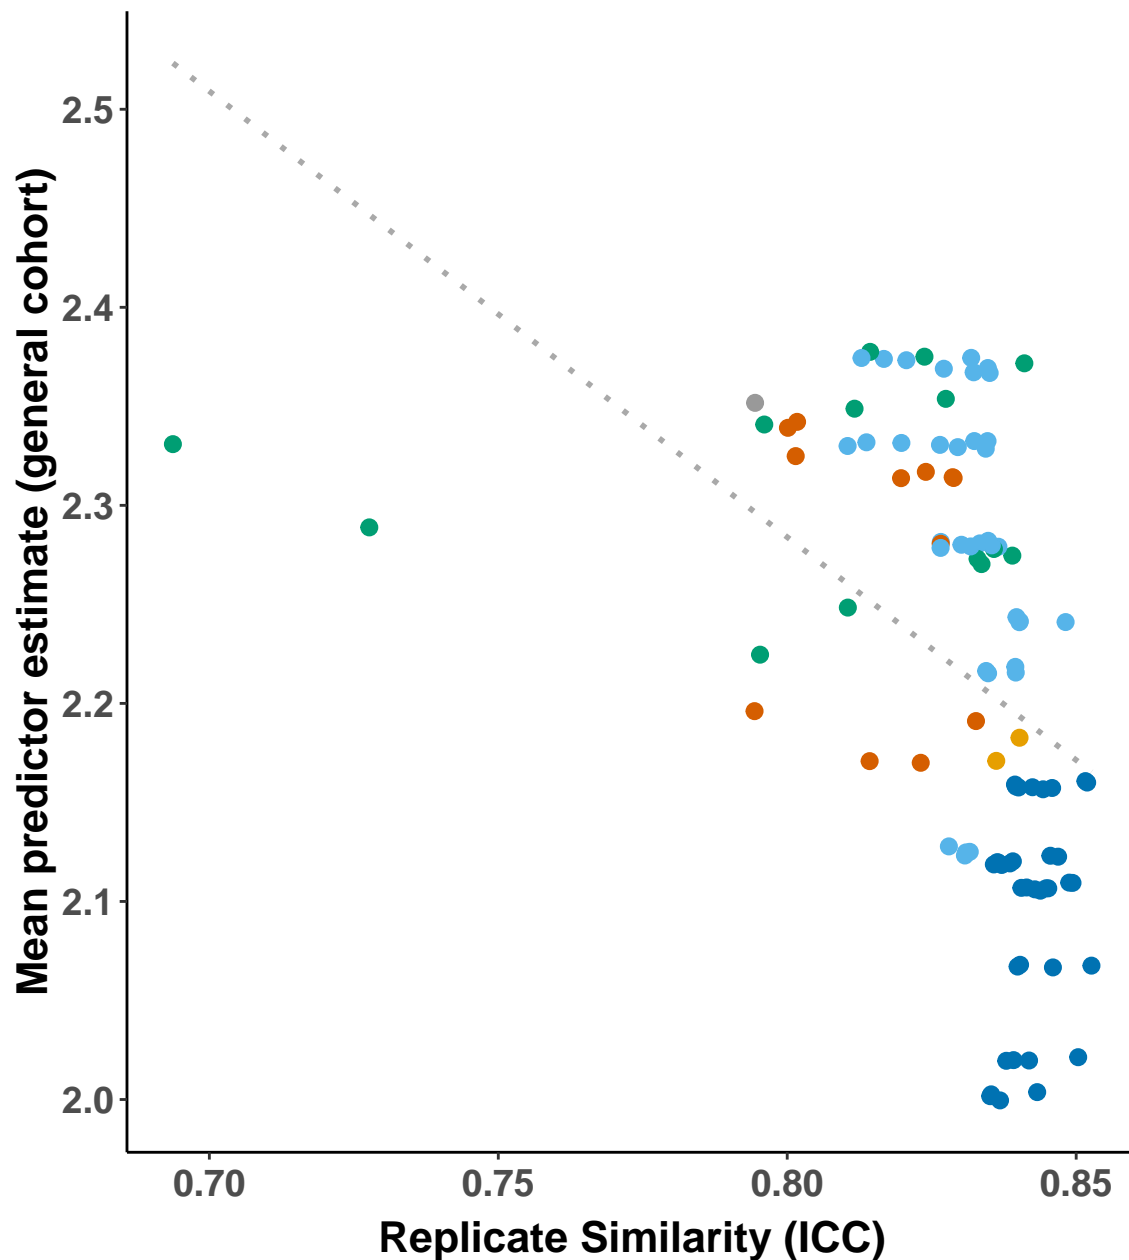

- Raw data
- ENmix\_RCP
- Minfi
- ENmix\_noRCP
- Hybrid
- WaterRmelon

$\rho = 0.74$ ,  $P = 0e+00$

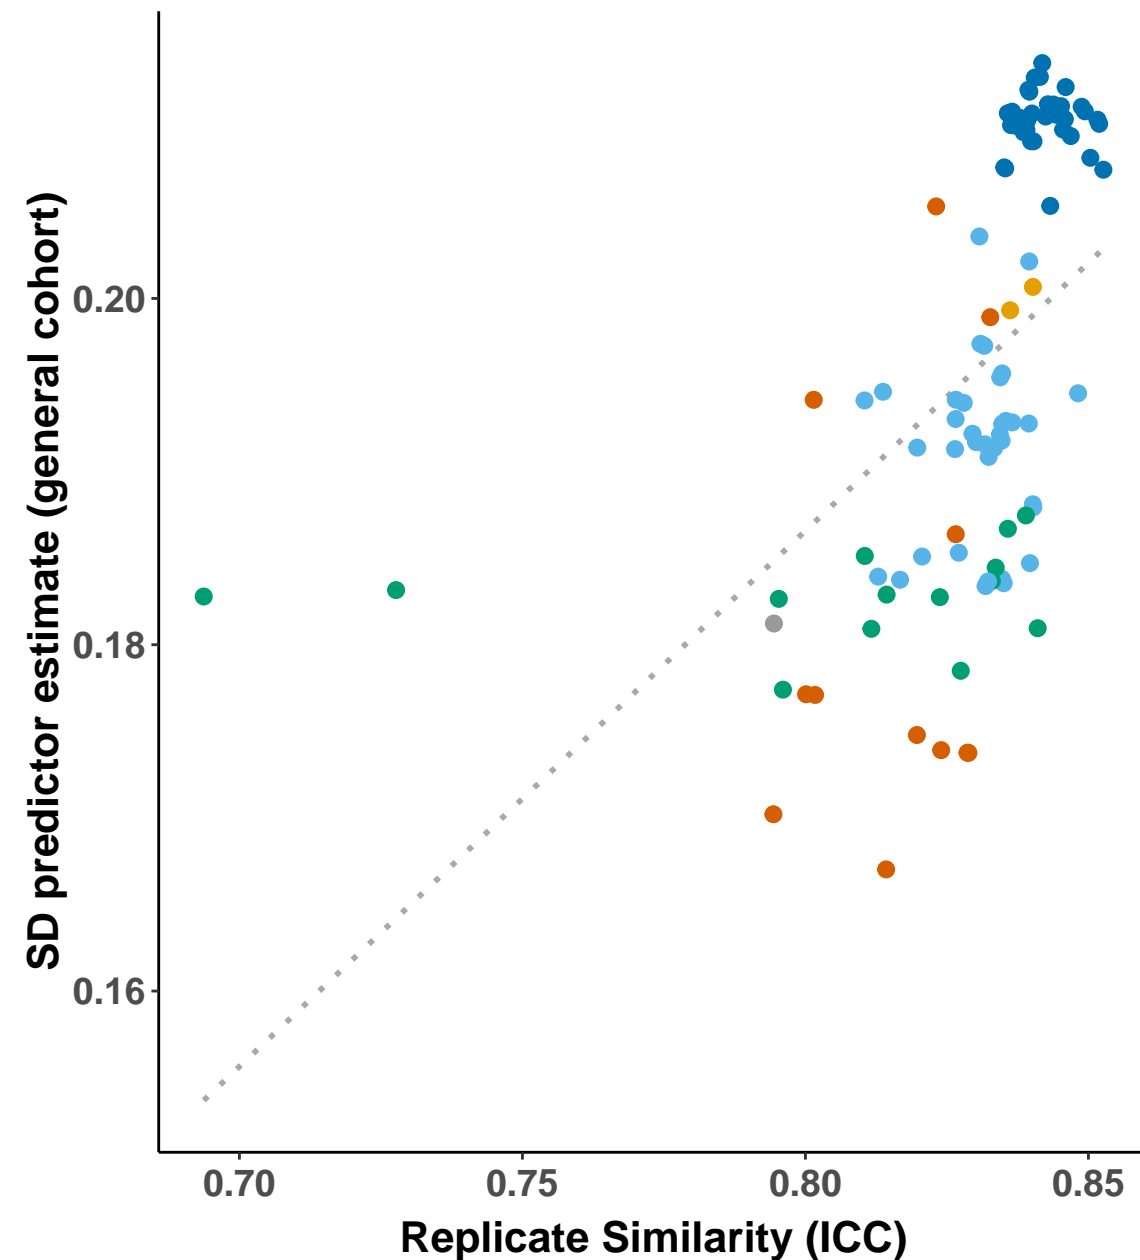

- Raw data
- ENmix\_RCP
- Minfi
- ENmix\_noRCP
- Hybrid
- WaterRmelon

# HDLratio

$\rho=0.38$ ,  $P=9.79e-05$

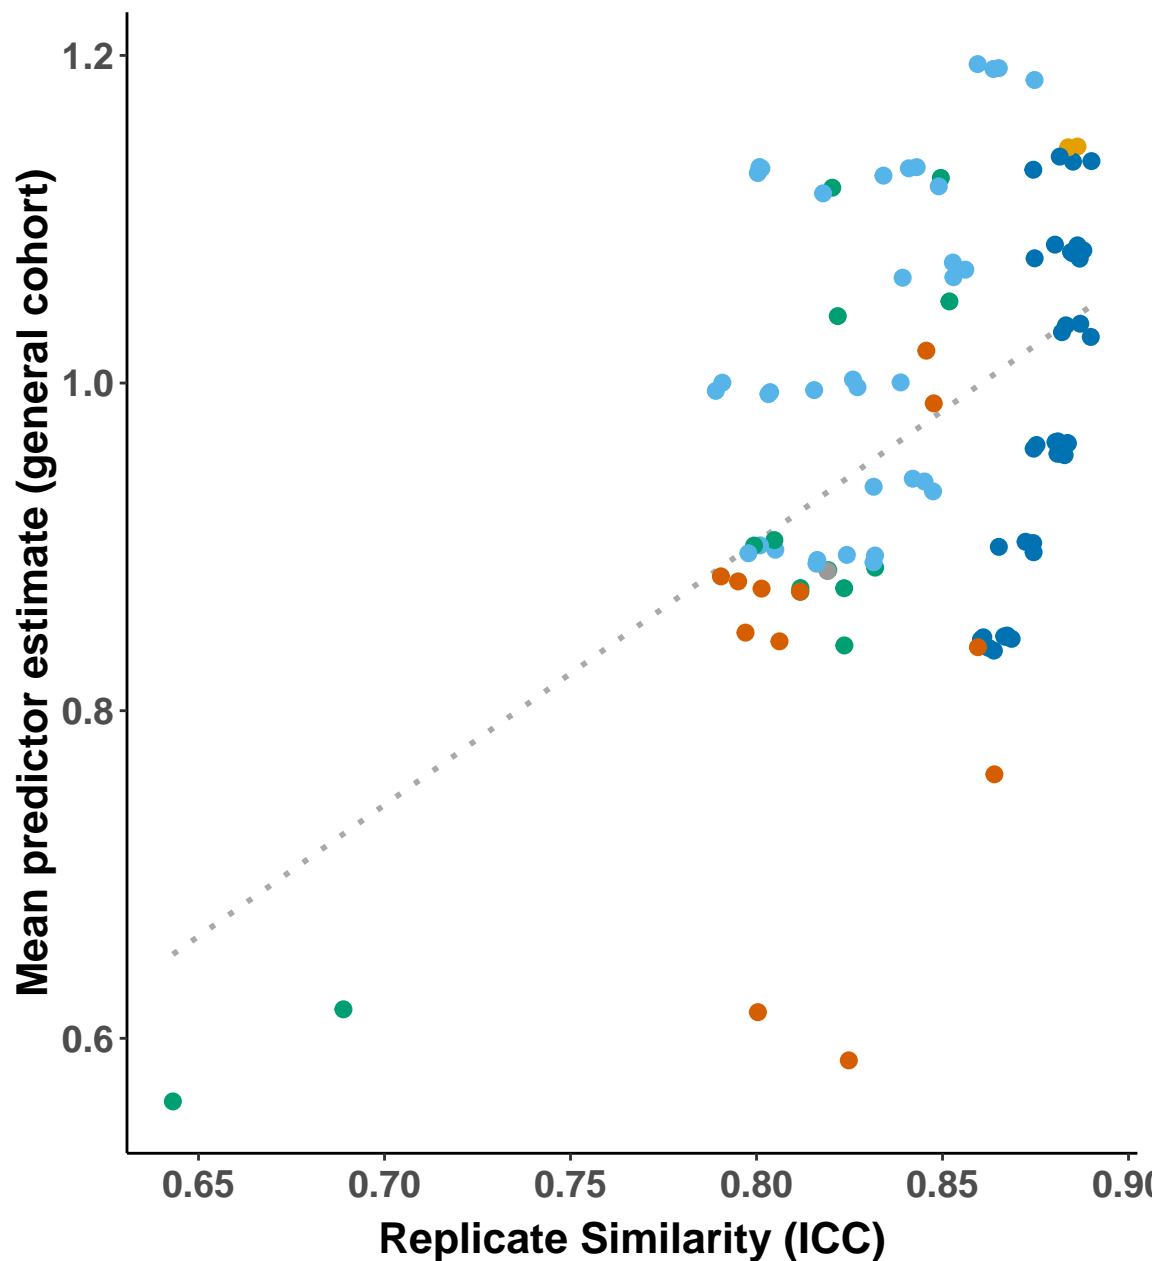

- Raw data
- ENmix\_RCP
- Minfi
- ENmix\_noRCP
- Hybrid
- WaterRmelon

$\rho=0$ ,  $P=9.63e-01$

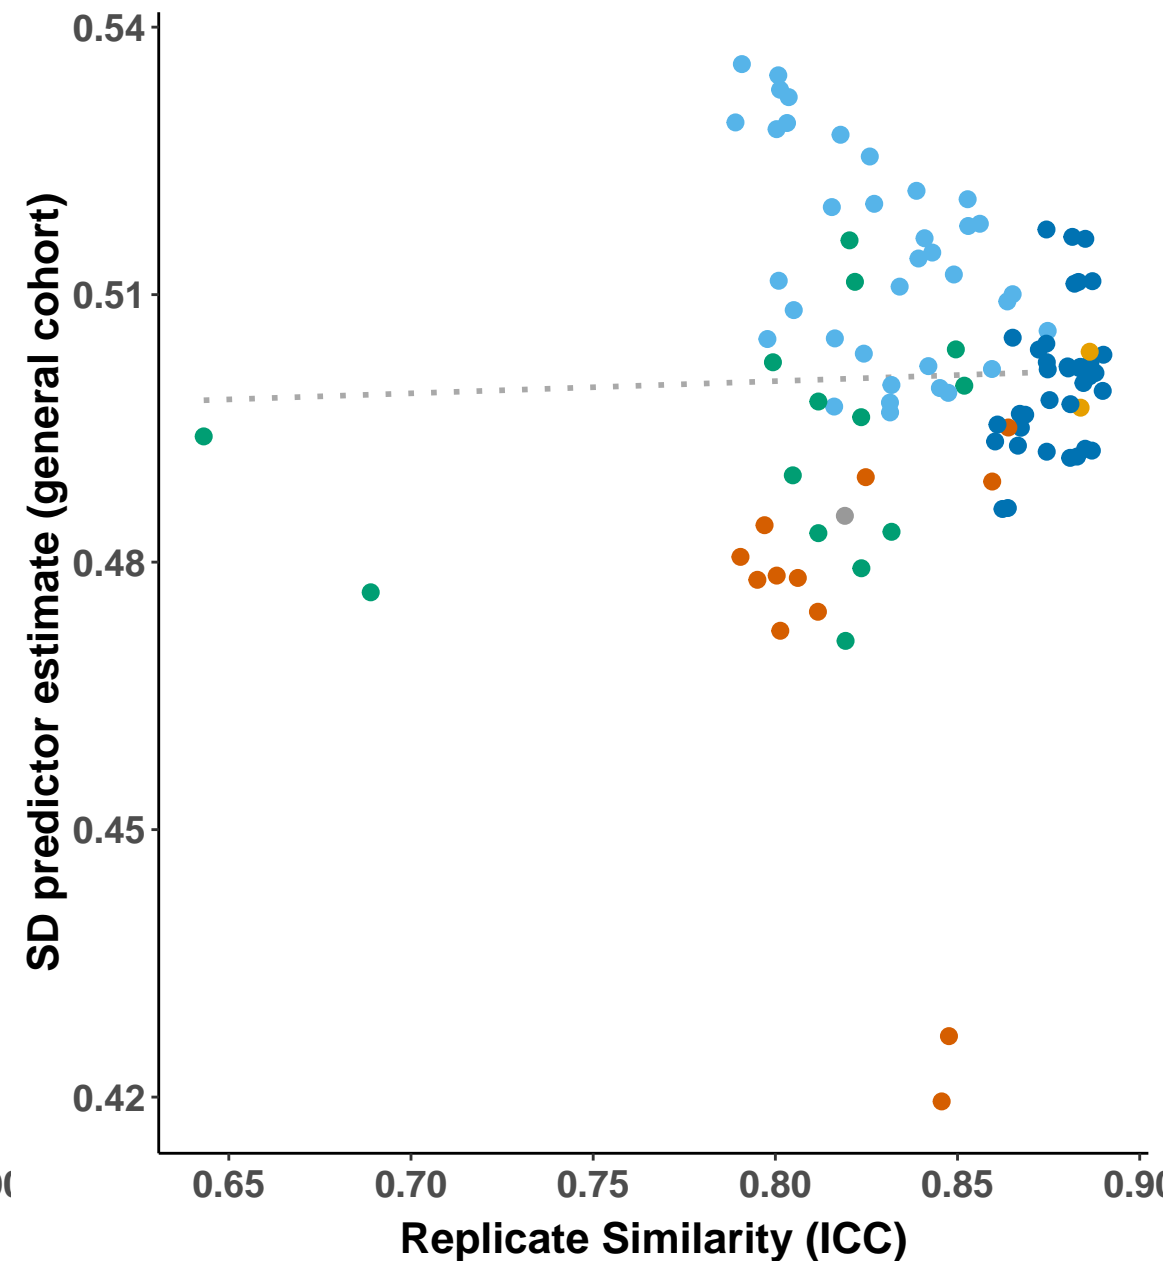

- Raw data
- ENmix\_RCP
- Minfi
- ENmix\_noRCP
- Hybrid
- WaterRmelon

## LDL

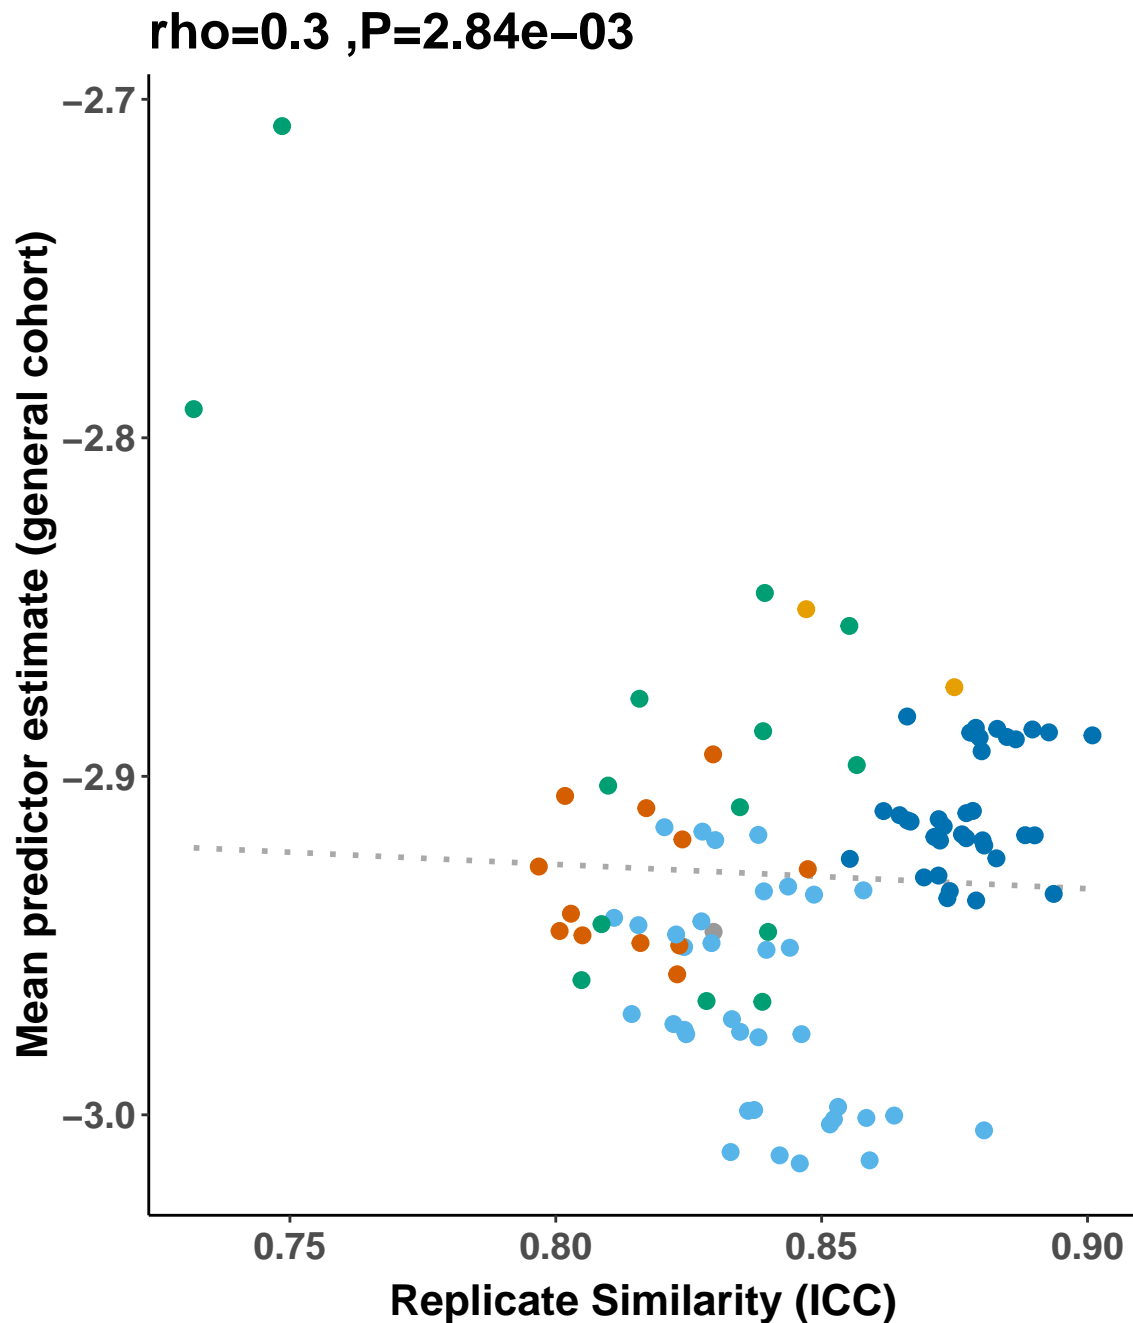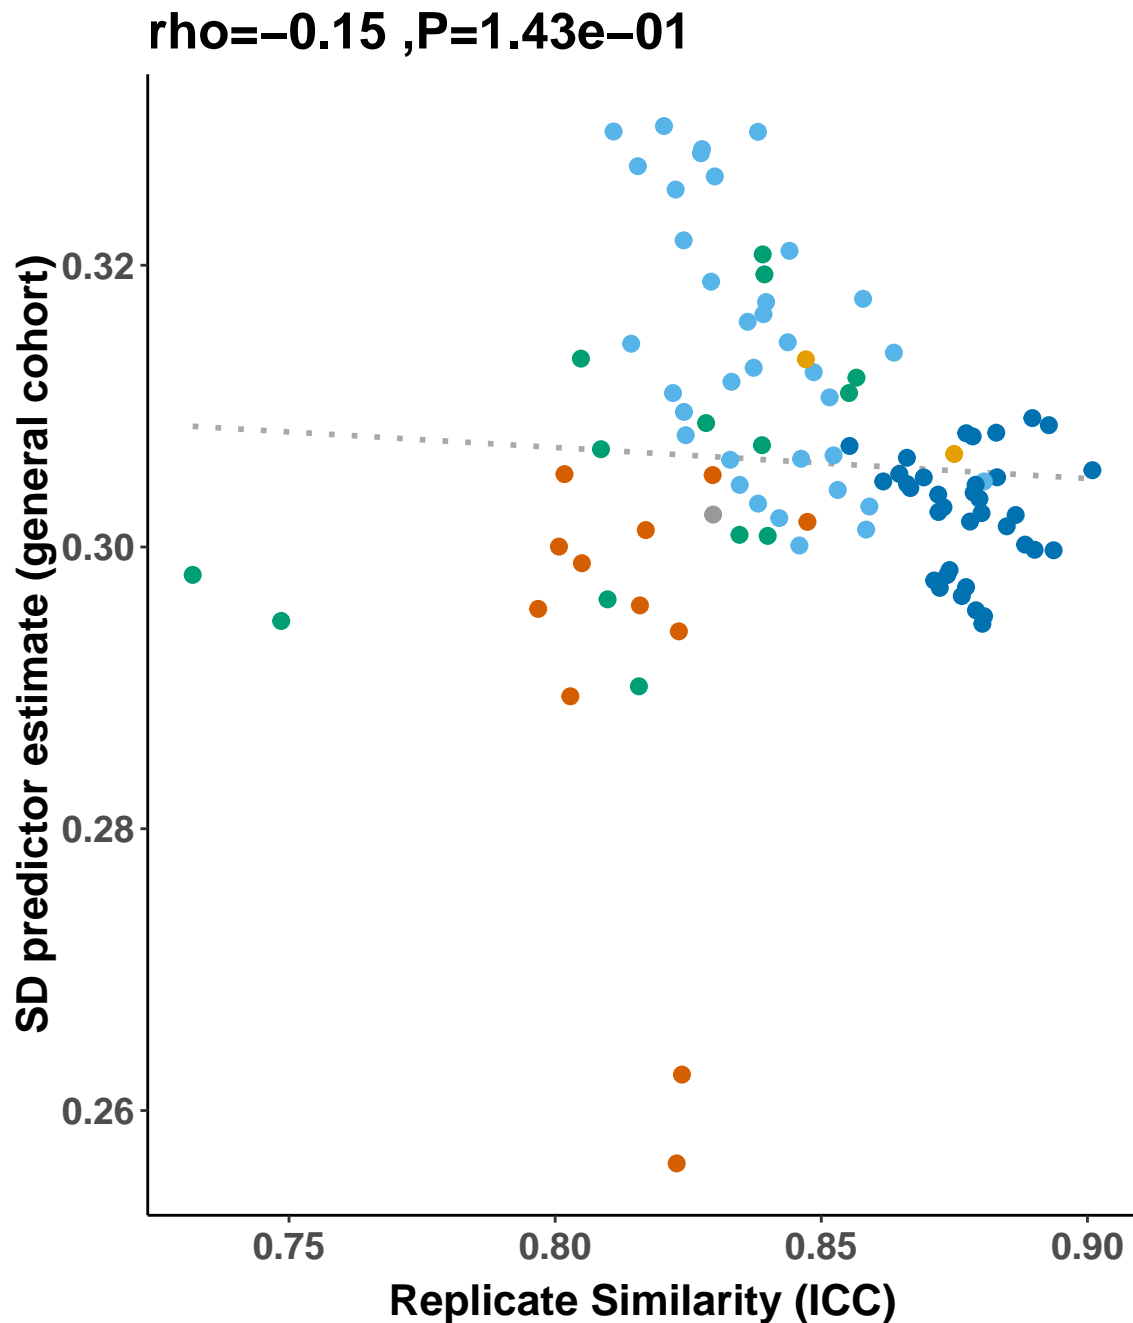

# Smoking\_McCartney

$\rho=0.06$  ,  $P=5.54e-01$

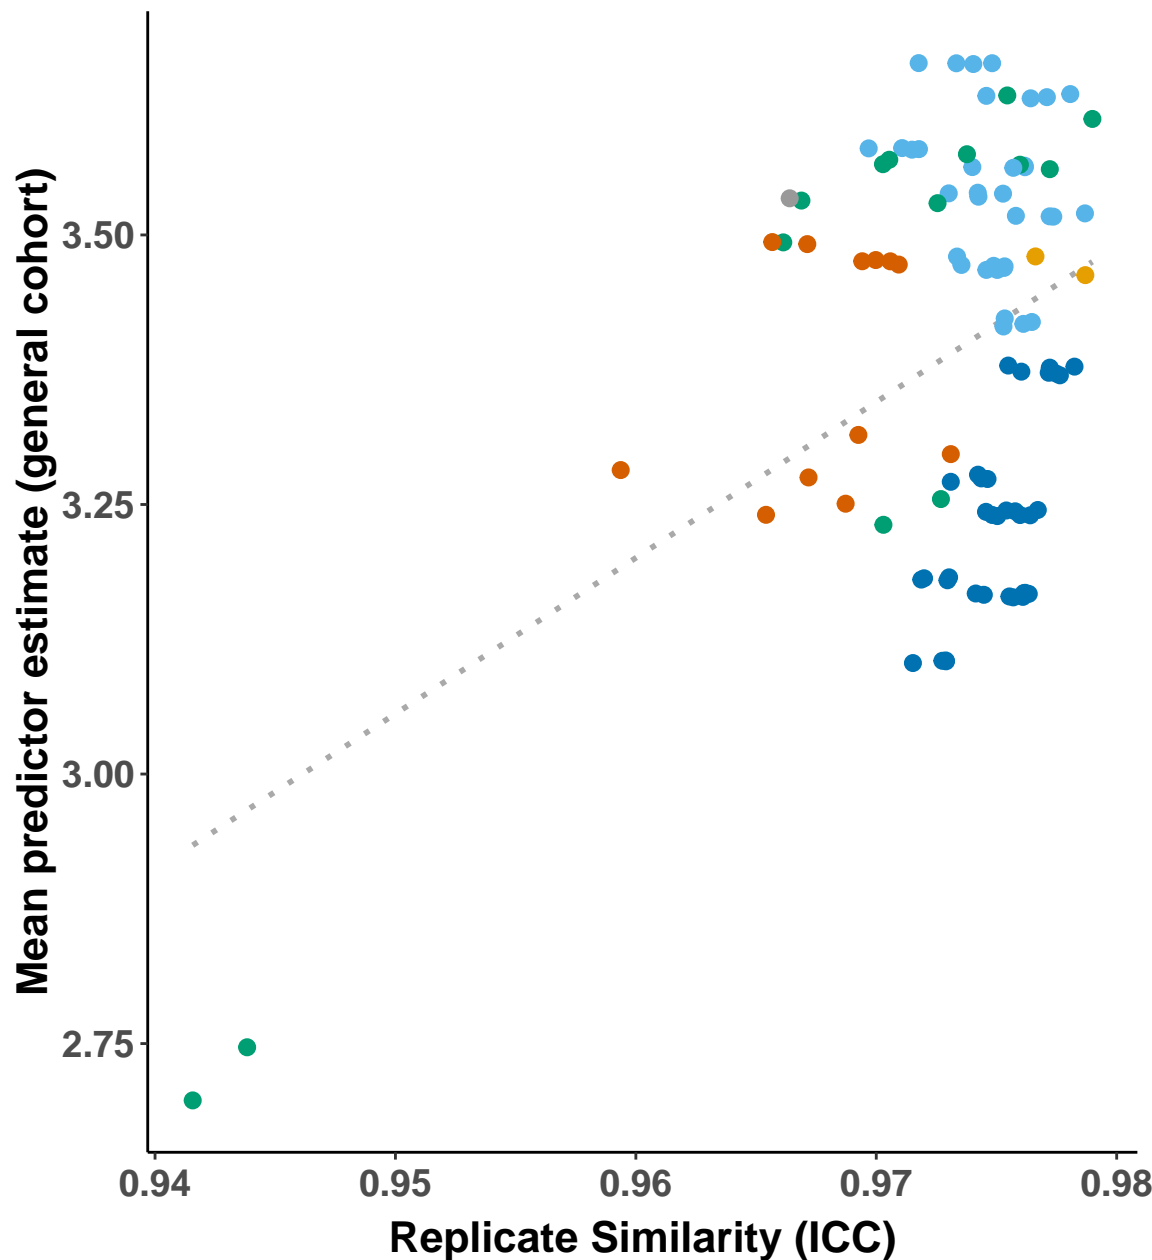

- Raw data
- ENmix\_RCP
- Minfi
- ENmix\_noRCP
- Hybrid
- WaterRmelon

$\rho=0.51$  ,  $P=6.96e-08$

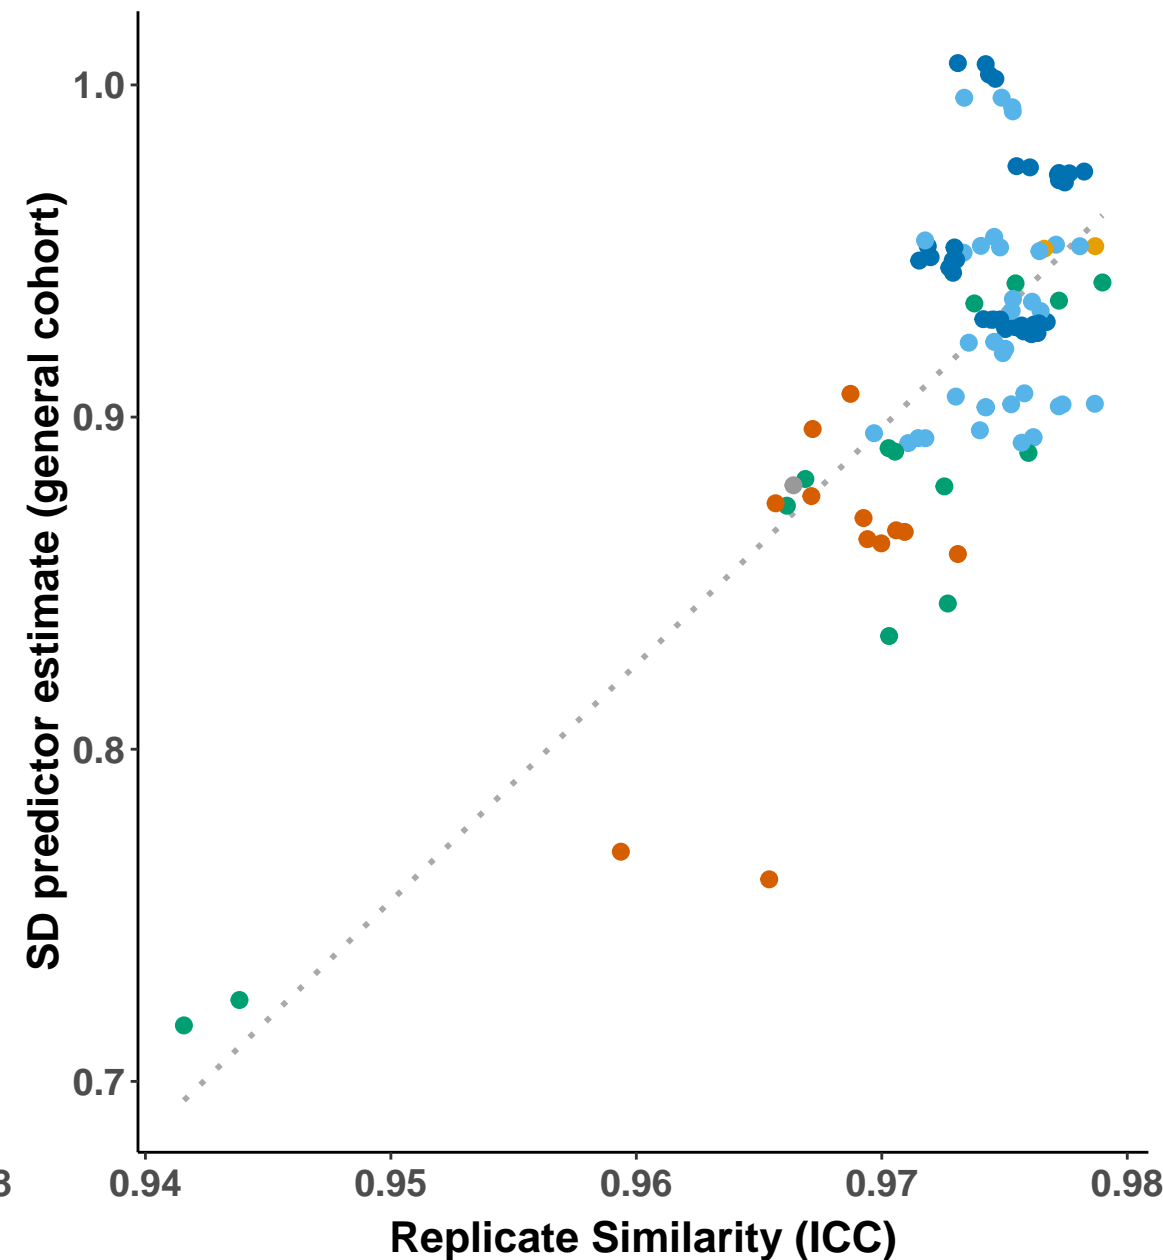

- Raw data
- ENmix\_RCP
- Minfi
- ENmix\_noRCP
- Hybrid
- WaterRmelon

# WHR

$\rho=0.73$ ,  $P=0e+00$

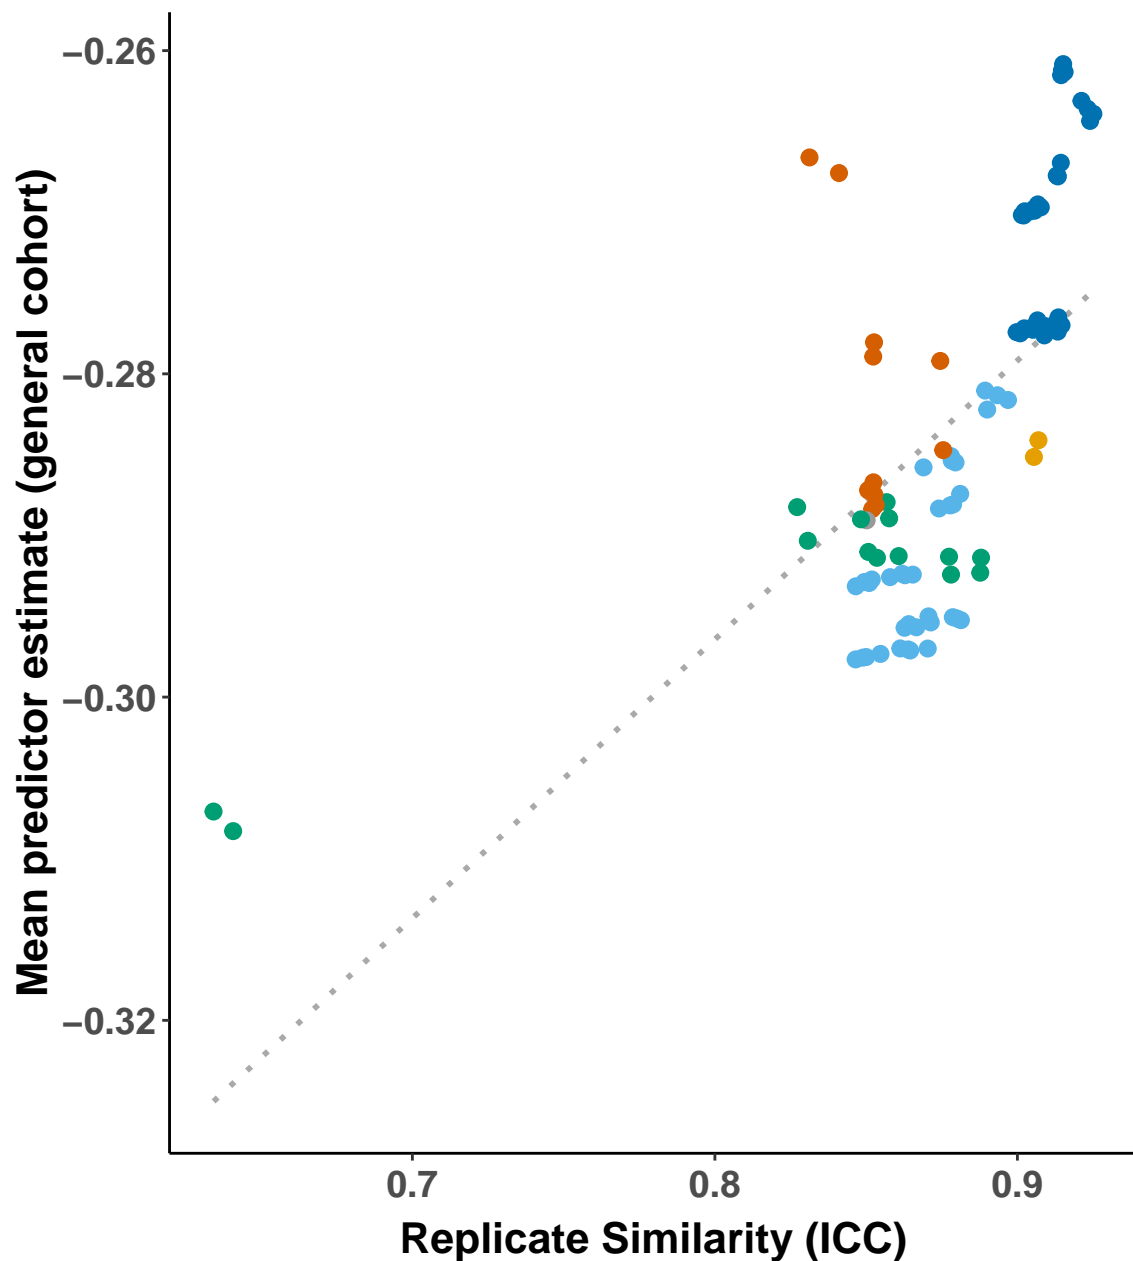

- Raw data
- ENmix\_RCP
- Minfi
- ENmix\_noRCP
- Hybrid
- WaterRmelon

$\rho=0.6$ ,  $P=0e+00$

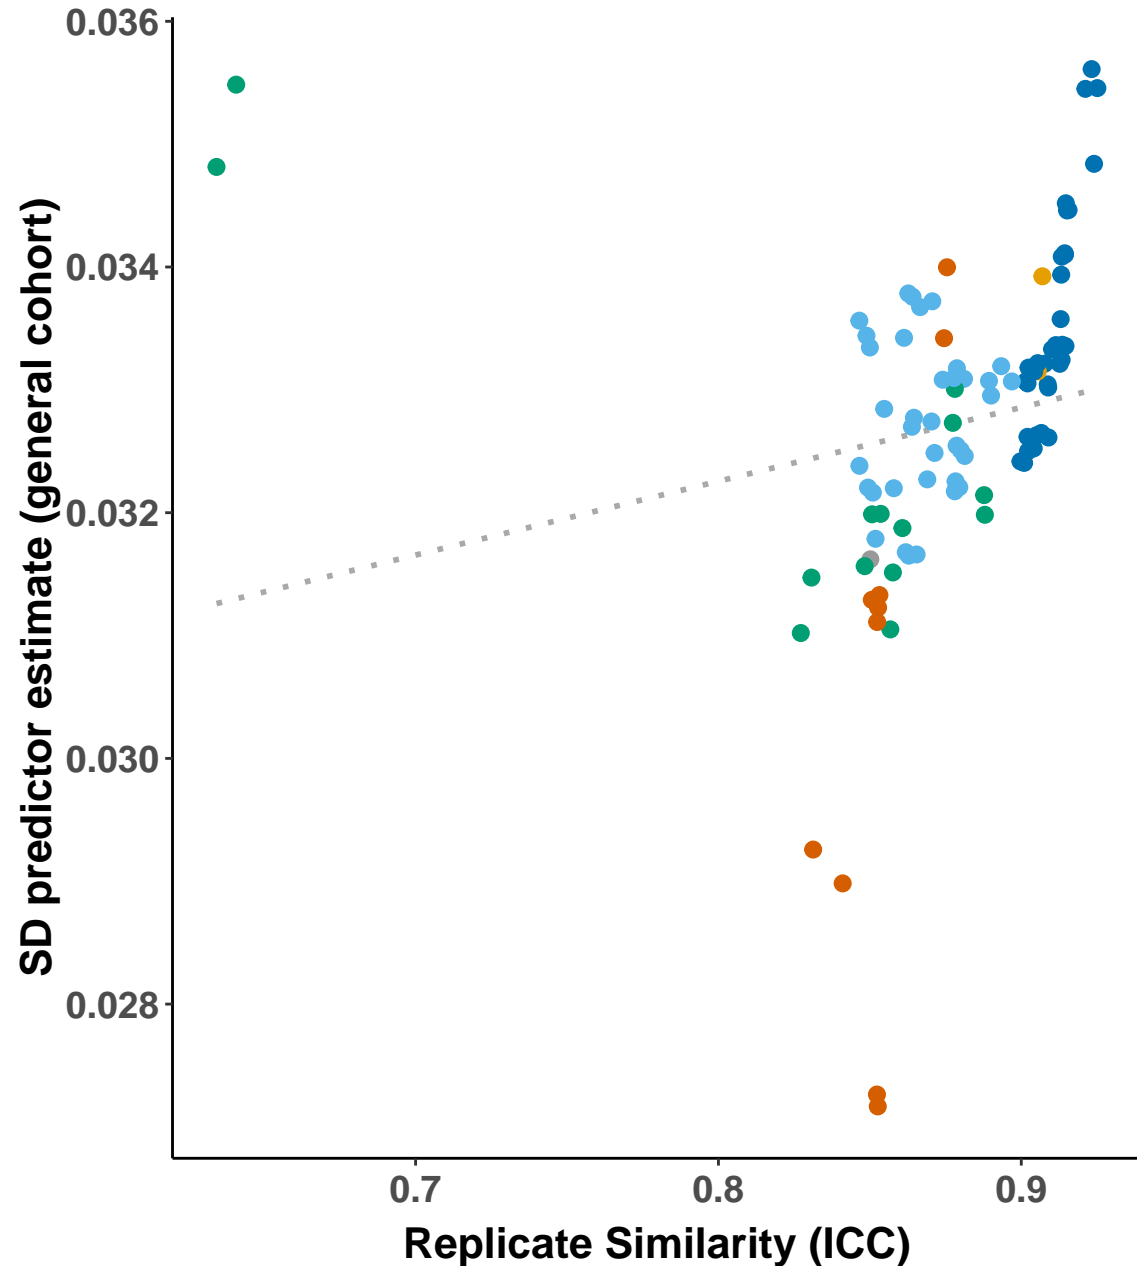

- Raw data
- ENmix\_RCP
- Minfi
- ENmix\_noRCP
- Hybrid
- WaterRmelon

Bcell

$\rho = -0.44$ ,  $P = 5.06e-06$

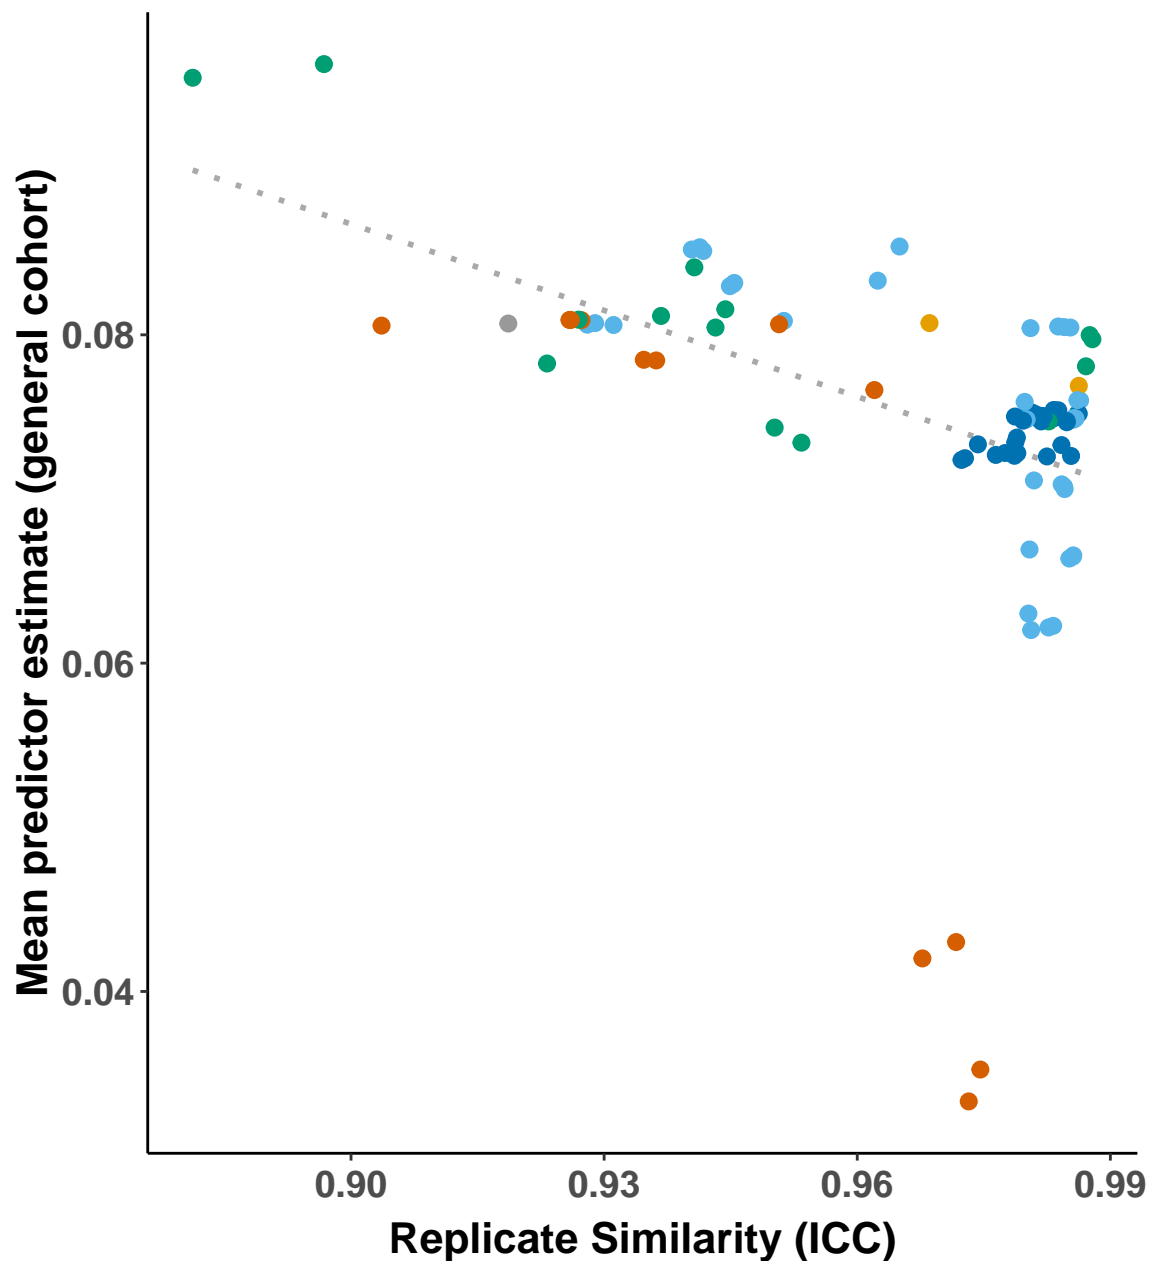

- Raw data
- ENmix\_RCP
- Minfi
- ENmix\_noRCP
- Hybrid
- WaterRmelon

$\rho = 0.16$ ,  $P = 1.01e-01$

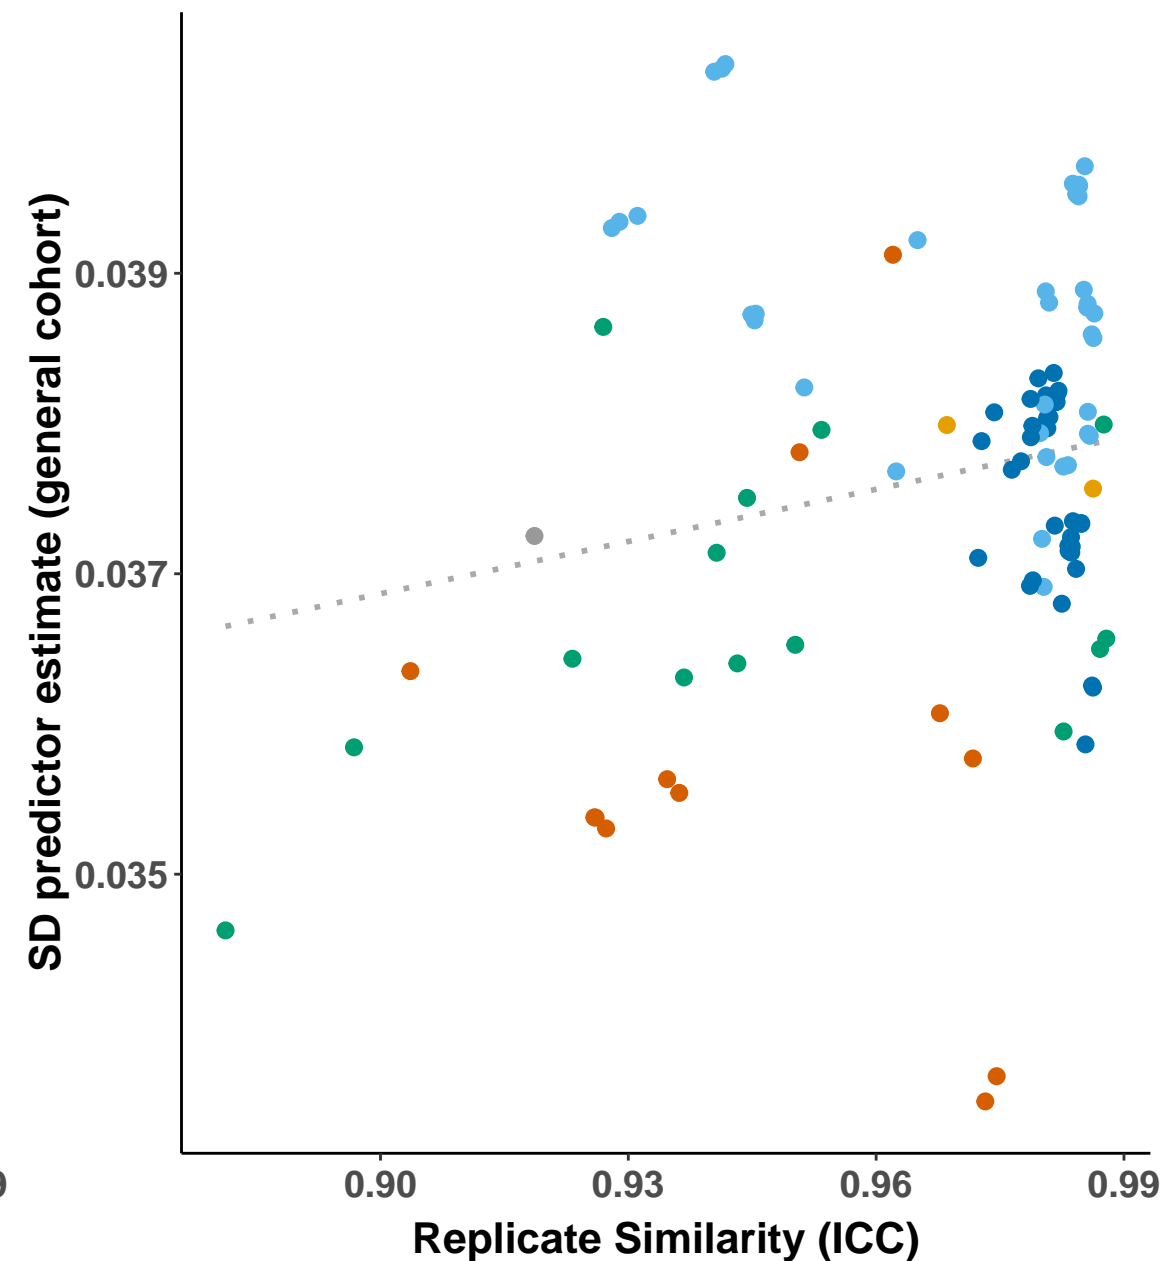

- Raw data
- ENmix\_RCP
- Minfi
- ENmix\_noRCP
- Hybrid
- WaterRmelon

# CD4T

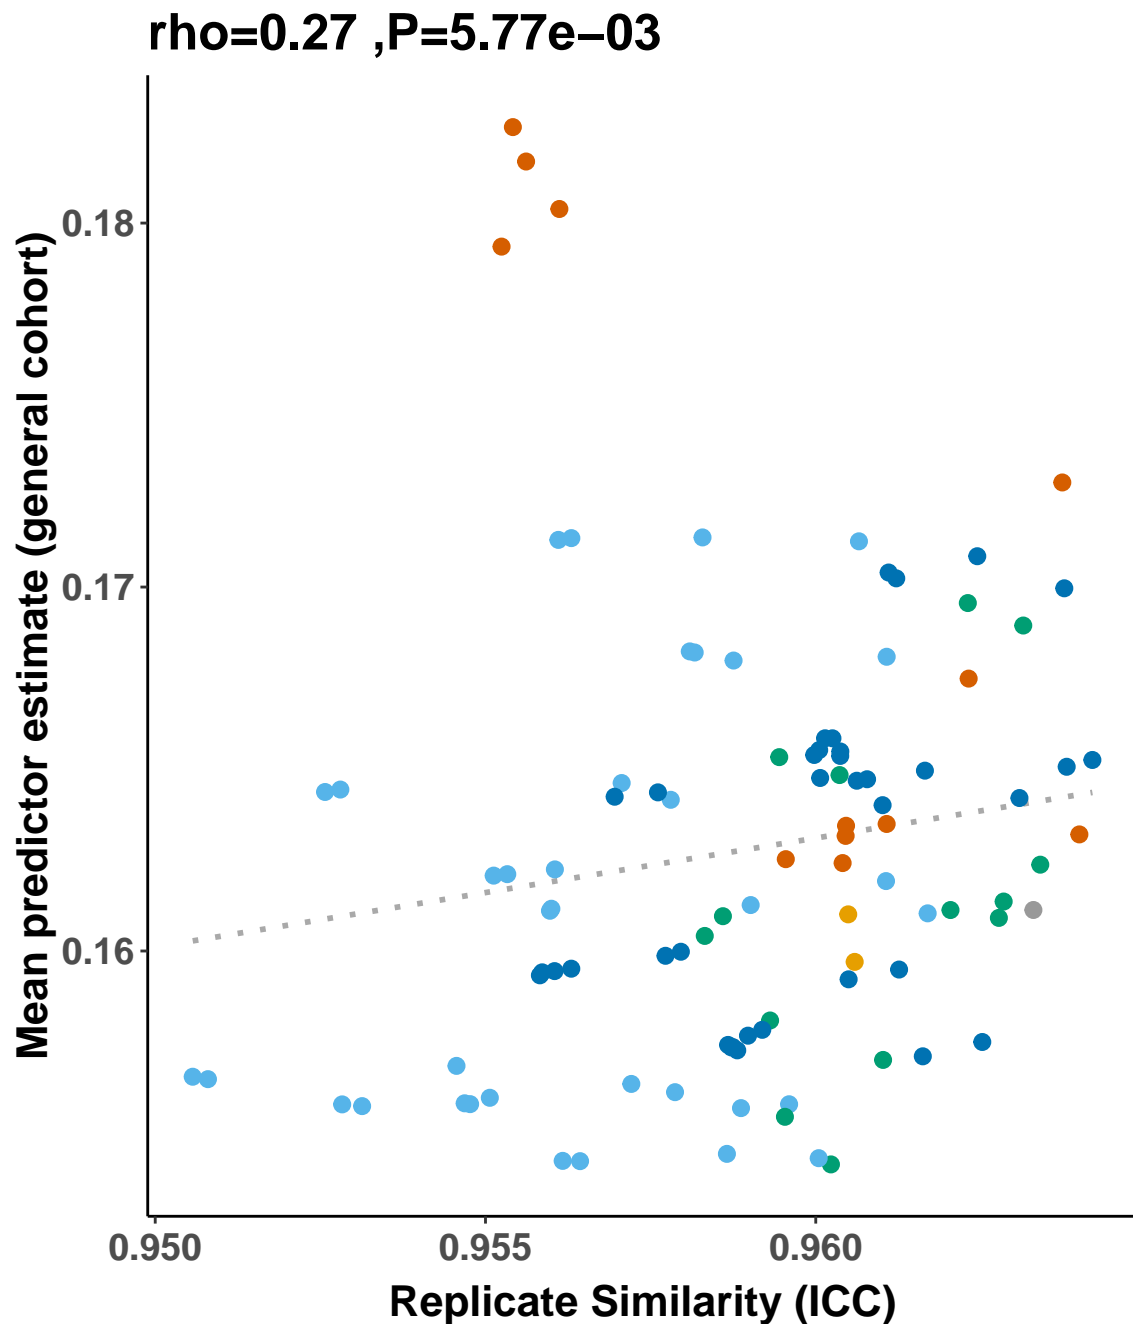

- Raw data
- ENmix\_RCP
- Minfi
- ENmix\_noRCP
- Hybrid
- WaterRmelon

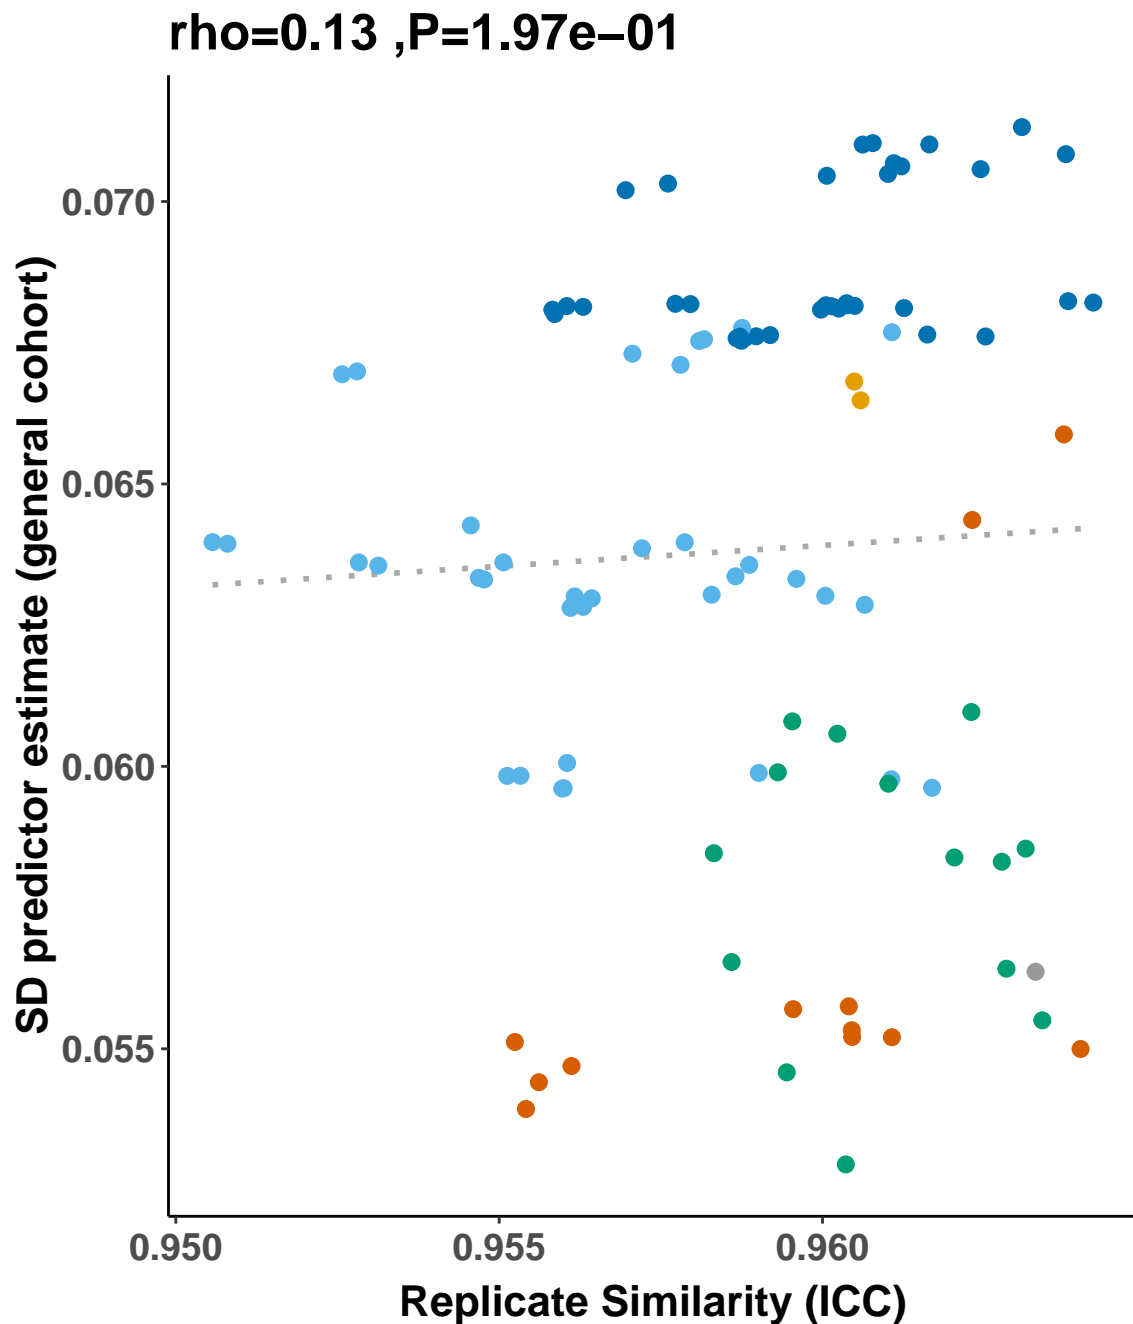

- Raw data
- ENmix\_RCP
- Minfi
- ENmix\_noRCP
- Hybrid
- WaterRmelon



CD8T

$\rho = -0.37$ ,  $P = 1.88e-04$

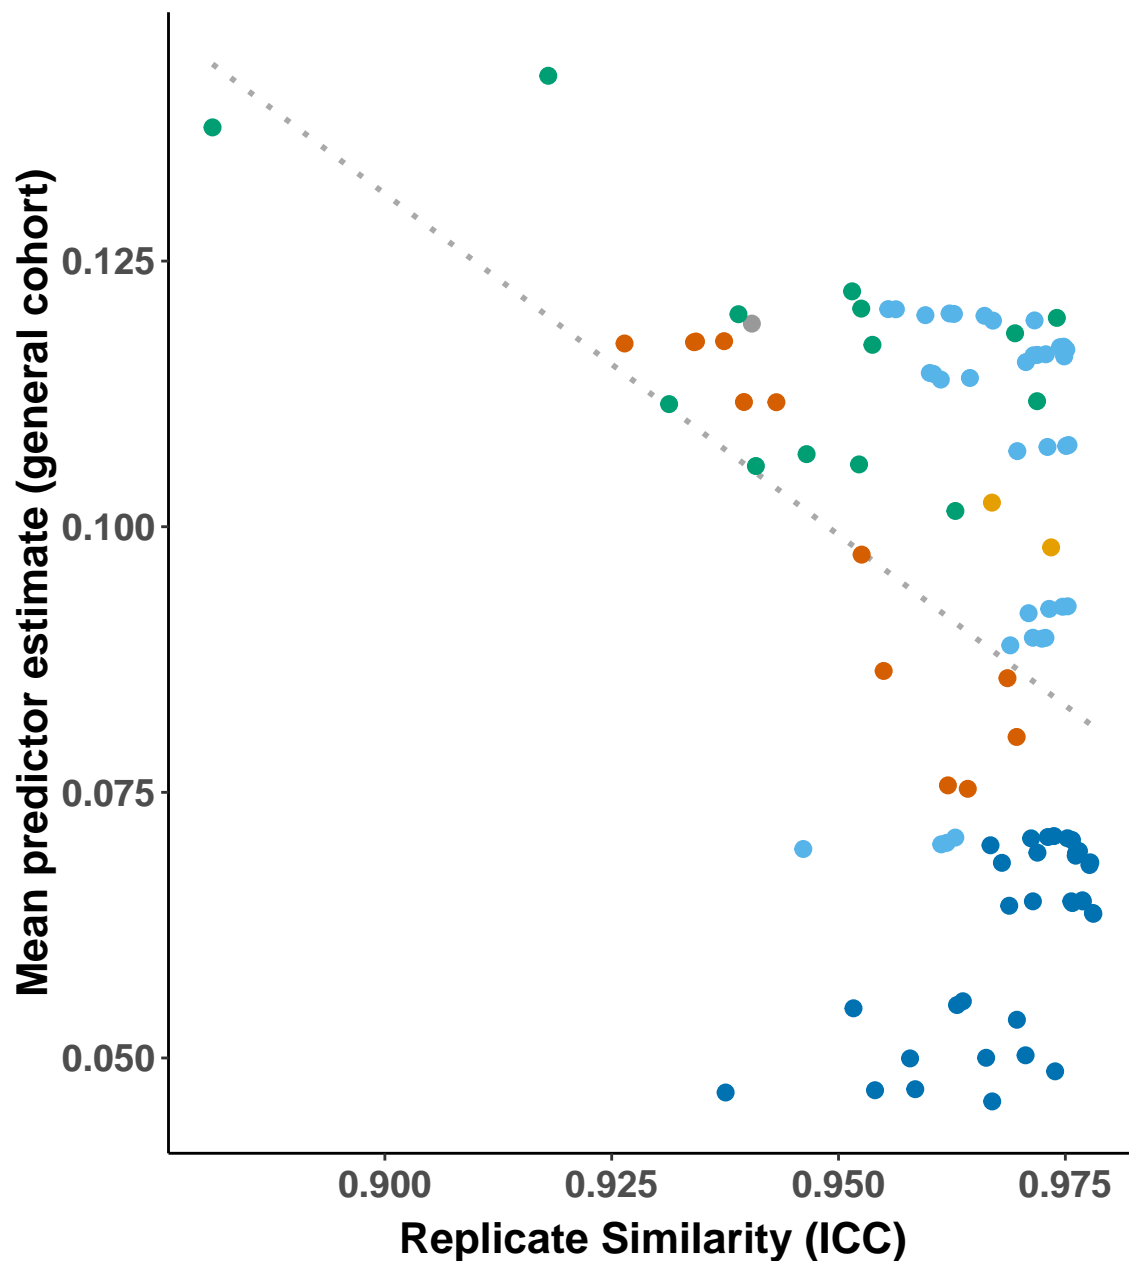

- Raw data
- ENmix\_RCP
- Minfi
- ENmix\_noRCP
- Hybrid
- WaterRmelon

$\rho = 0.34$ ,  $P = 6.01e-04$

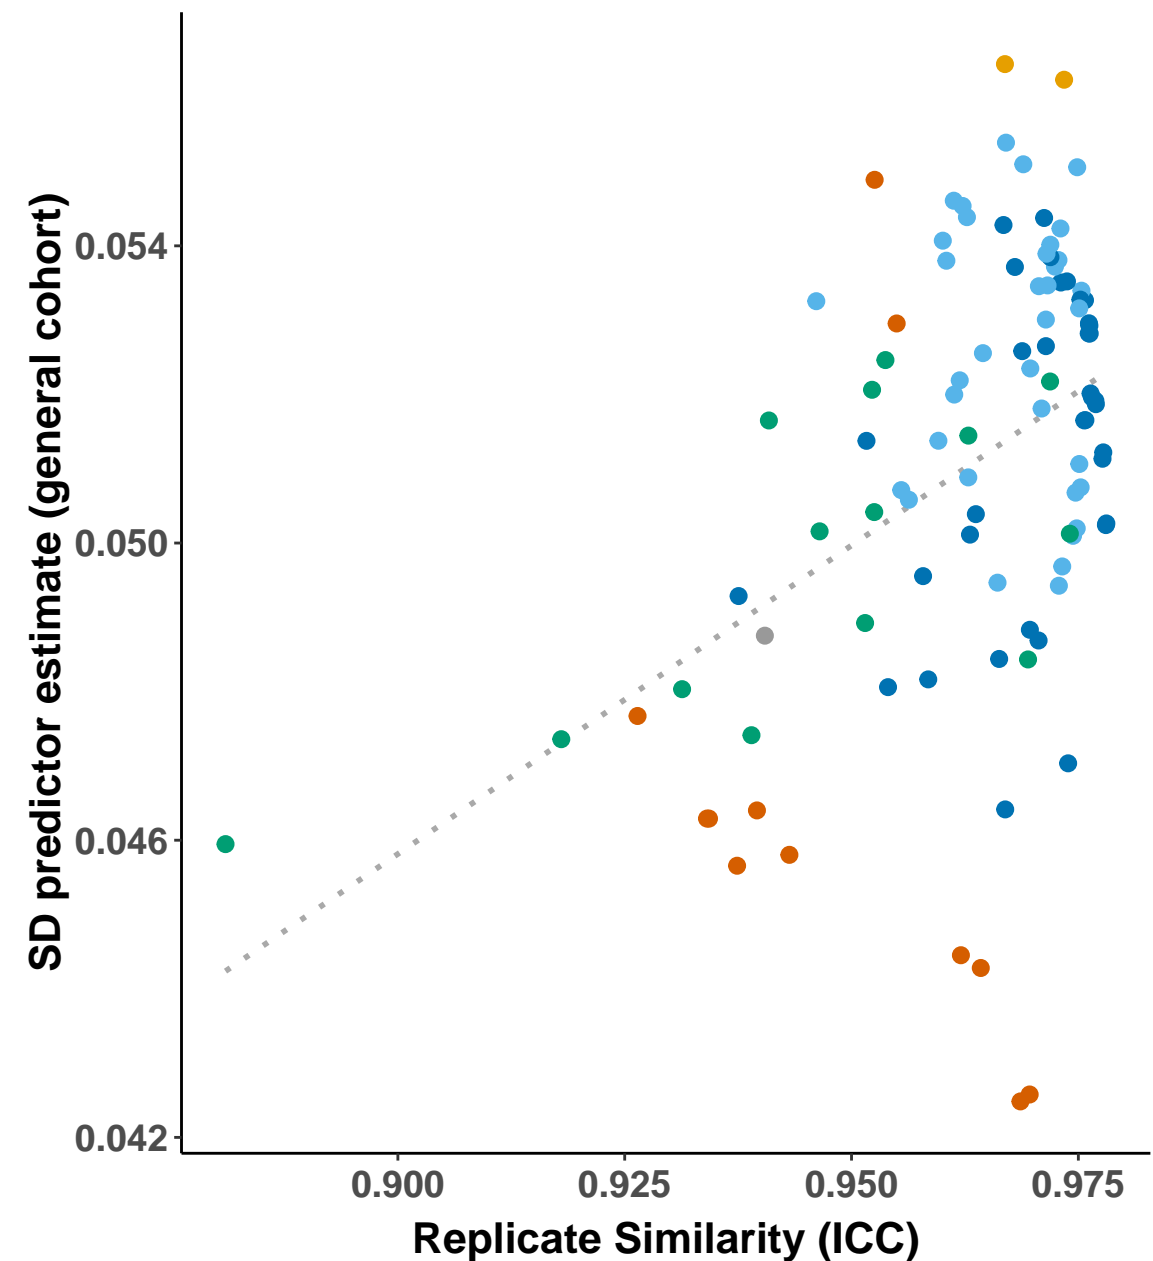

- Raw data
- ENmix\_RCP
- Minfi
- ENmix\_noRCP
- Hybrid
- WaterRmelon

# Mono

$\rho = -0.38$ ,  $P = 1.22e-04$

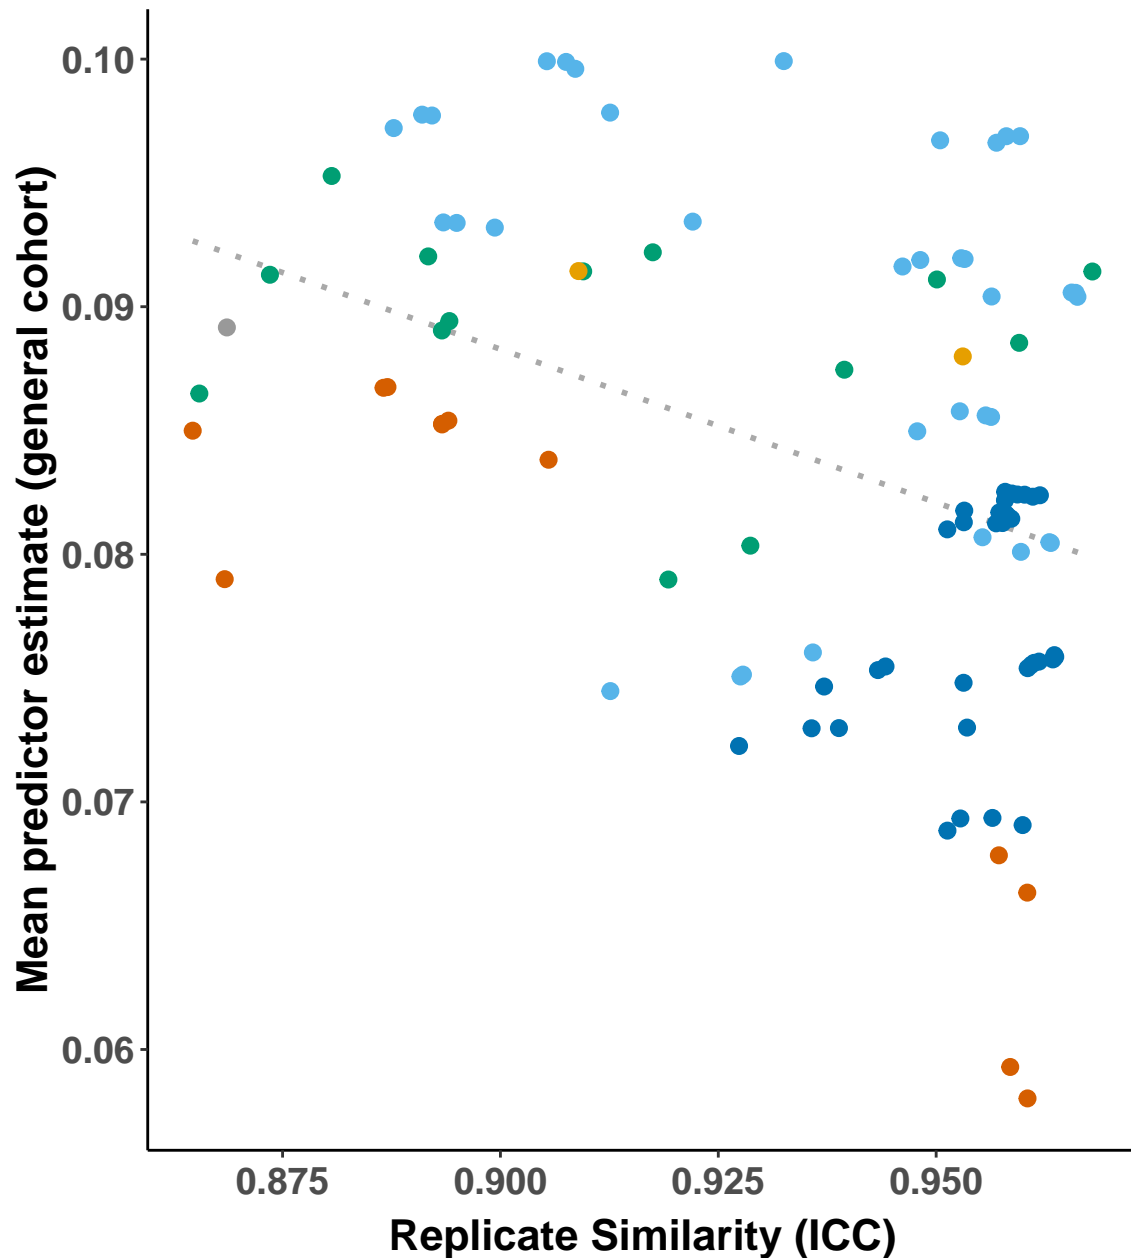

- Raw data
- ENmix\_RCP
- Minfi
- ENmix\_noRCP
- Hybrid
- WaterRmelon

$\rho = 0.36$ ,  $P = 1.99e-04$

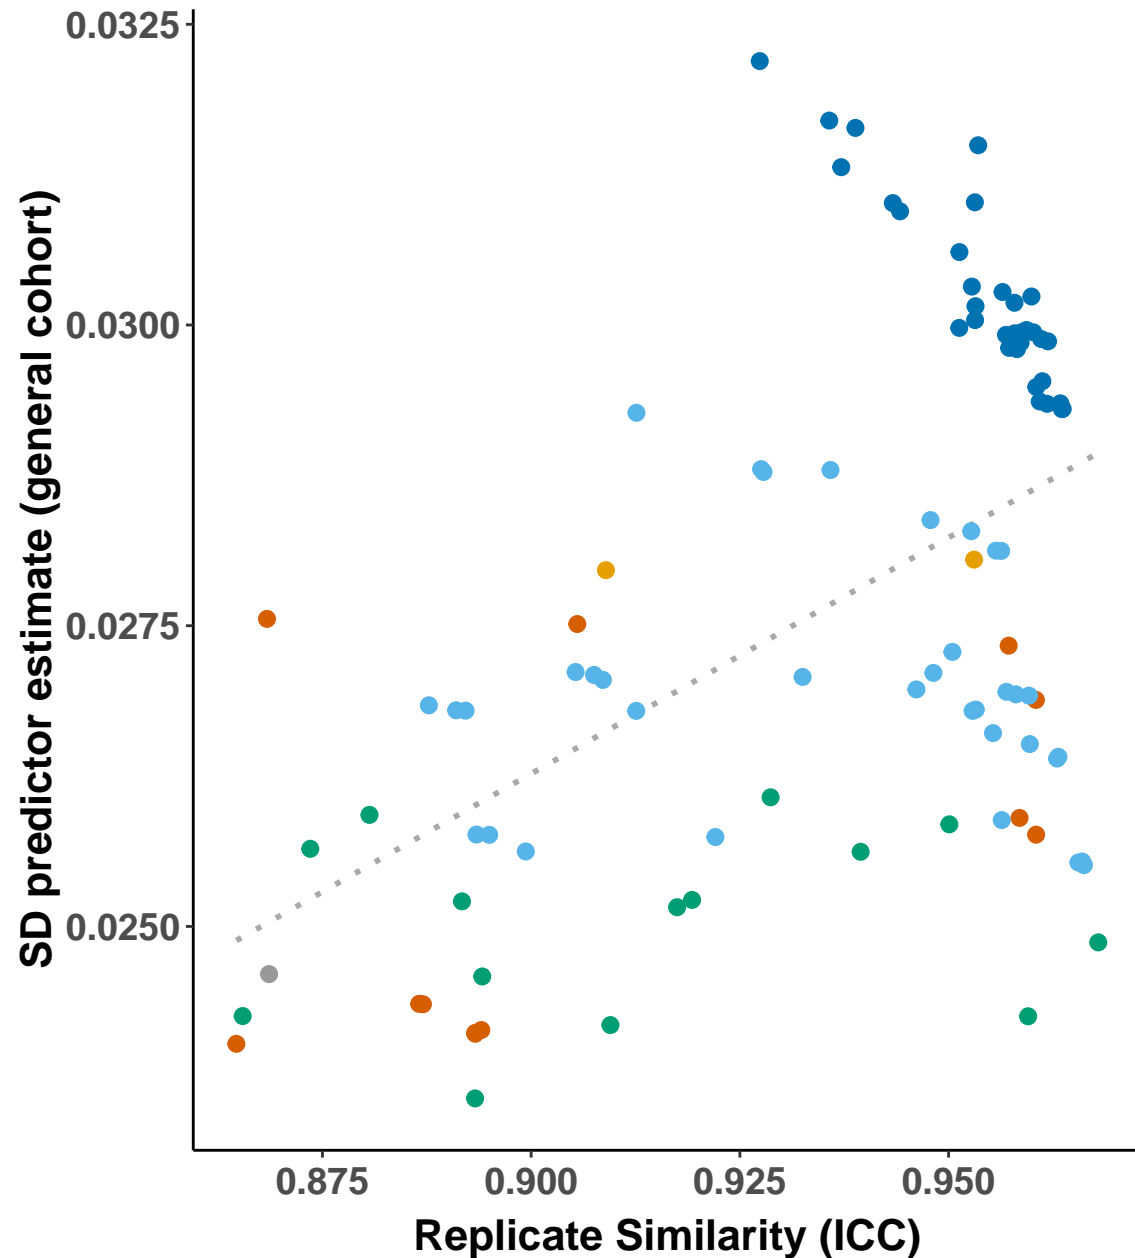

- Raw data
- ENmix\_RCP
- Minfi
- ENmix\_noRCP
- Hybrid
- WaterRmelon

NK

$\rho=0.11$  ,  $P=2.59e-01$

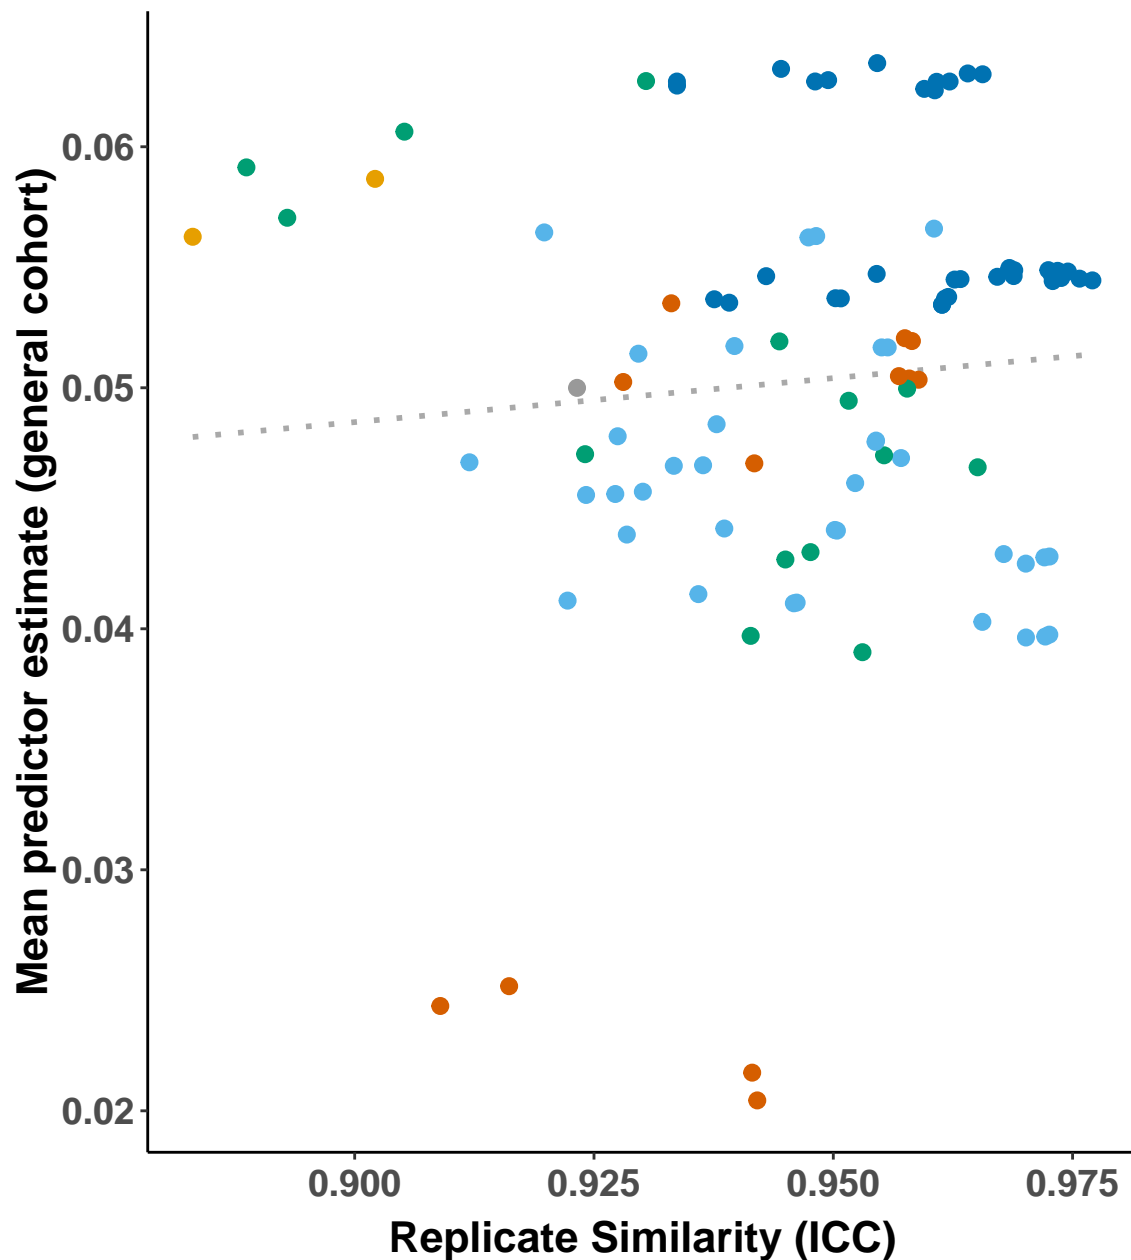

$\rho=0.41$  ,  $P=1.92e-05$

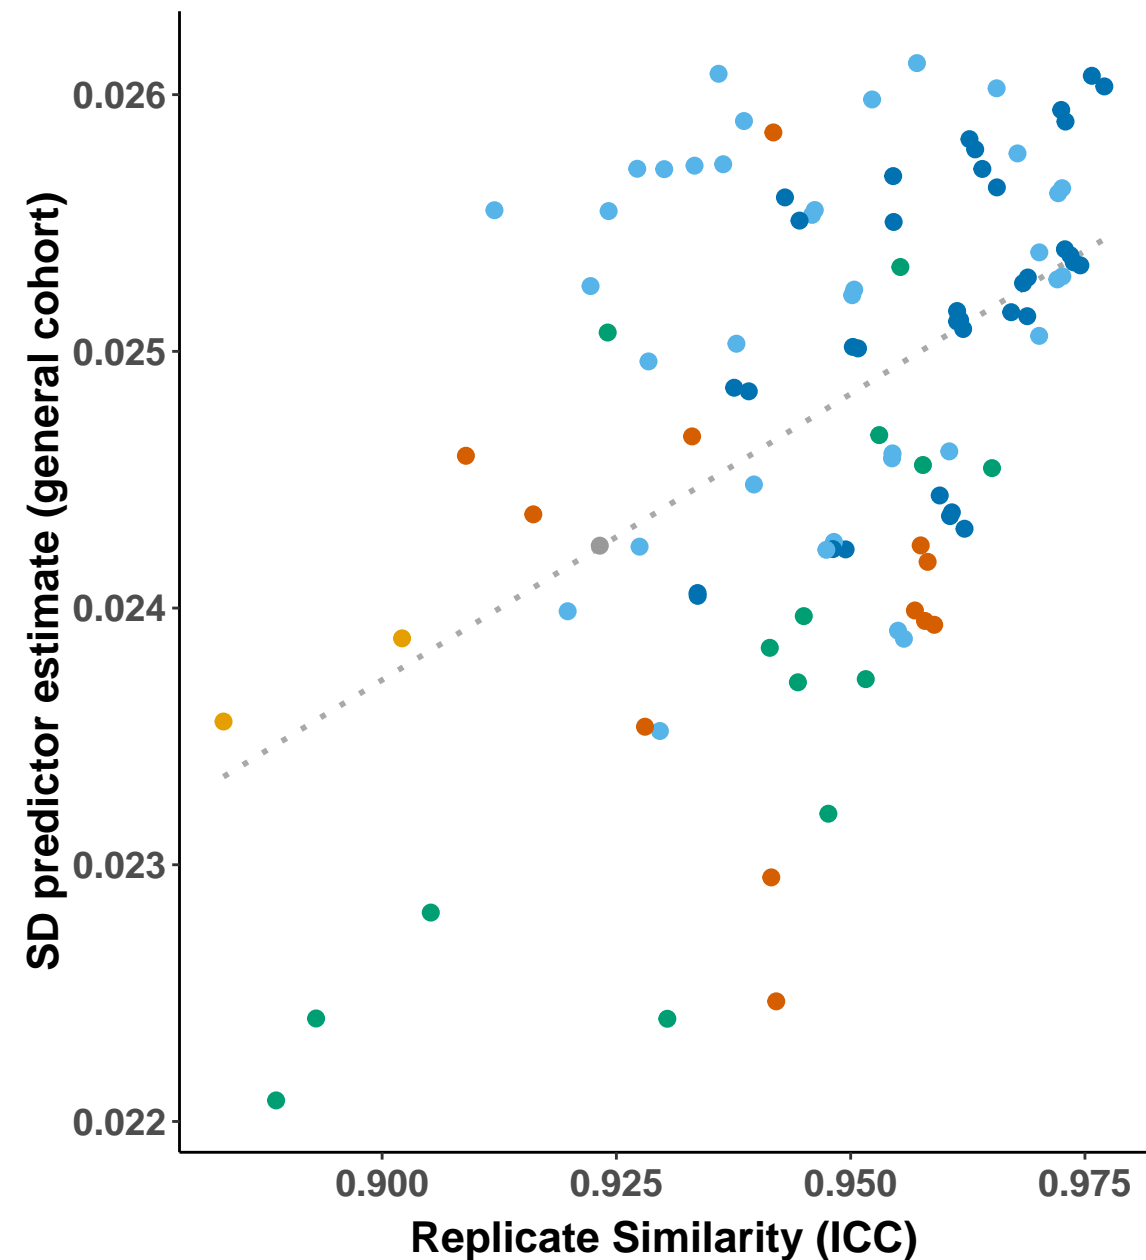

Neu

$\rho=0.56$  ,  $P=2.52e-09$

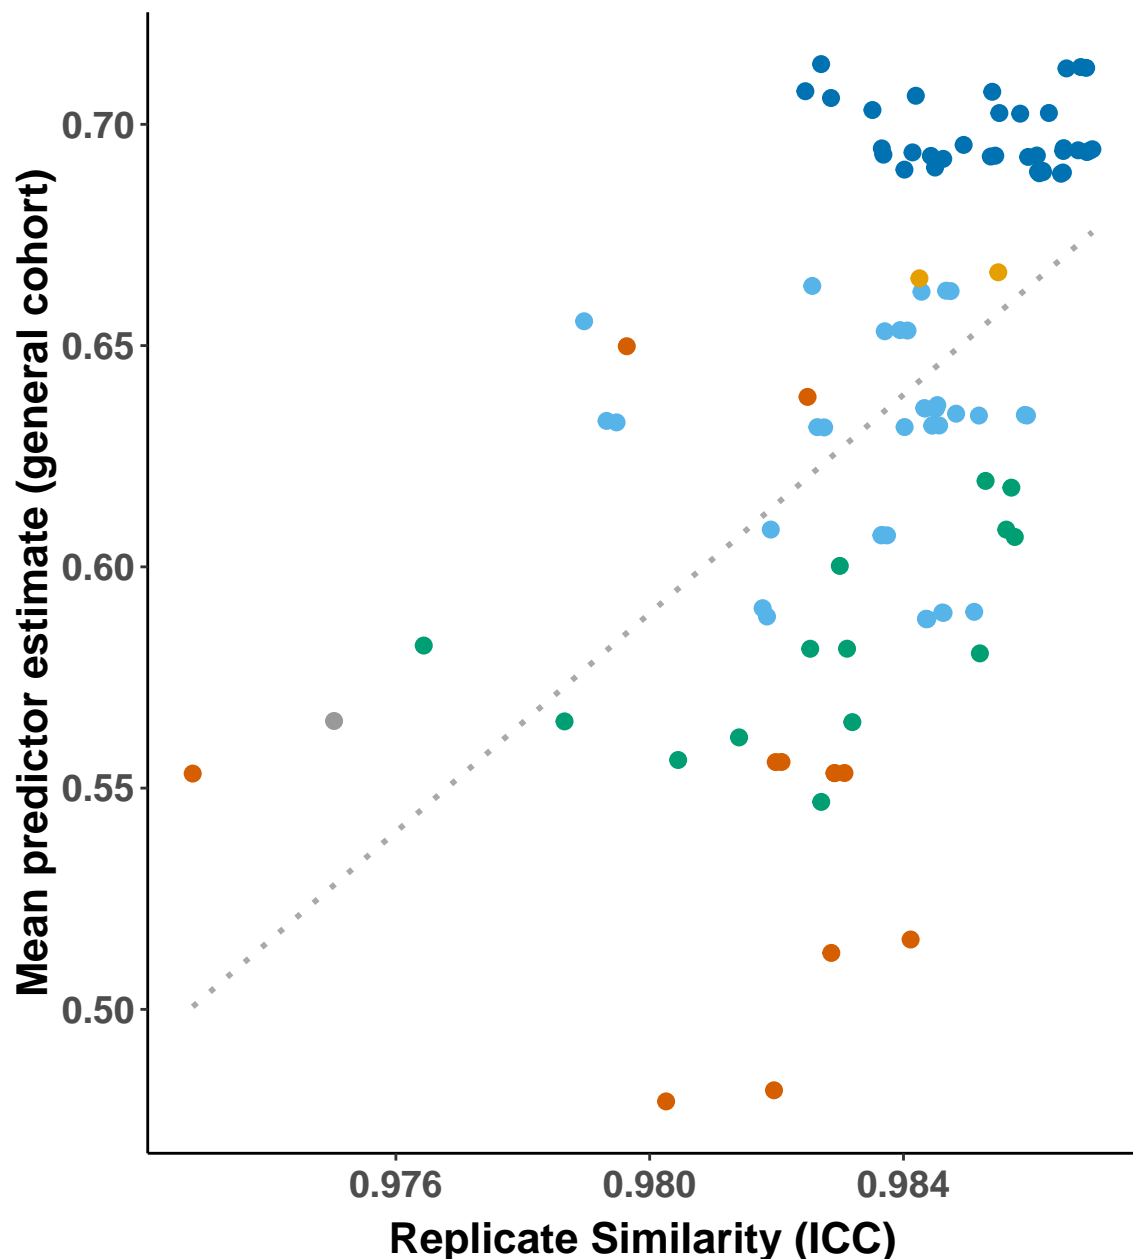

● Raw data    ● ENmix\_RCP    ● Minfi  
● ENmix\_noRCP    ● Hybrid    ● Watermelon

$\rho=0.51$  ,  $P=6.06e-08$

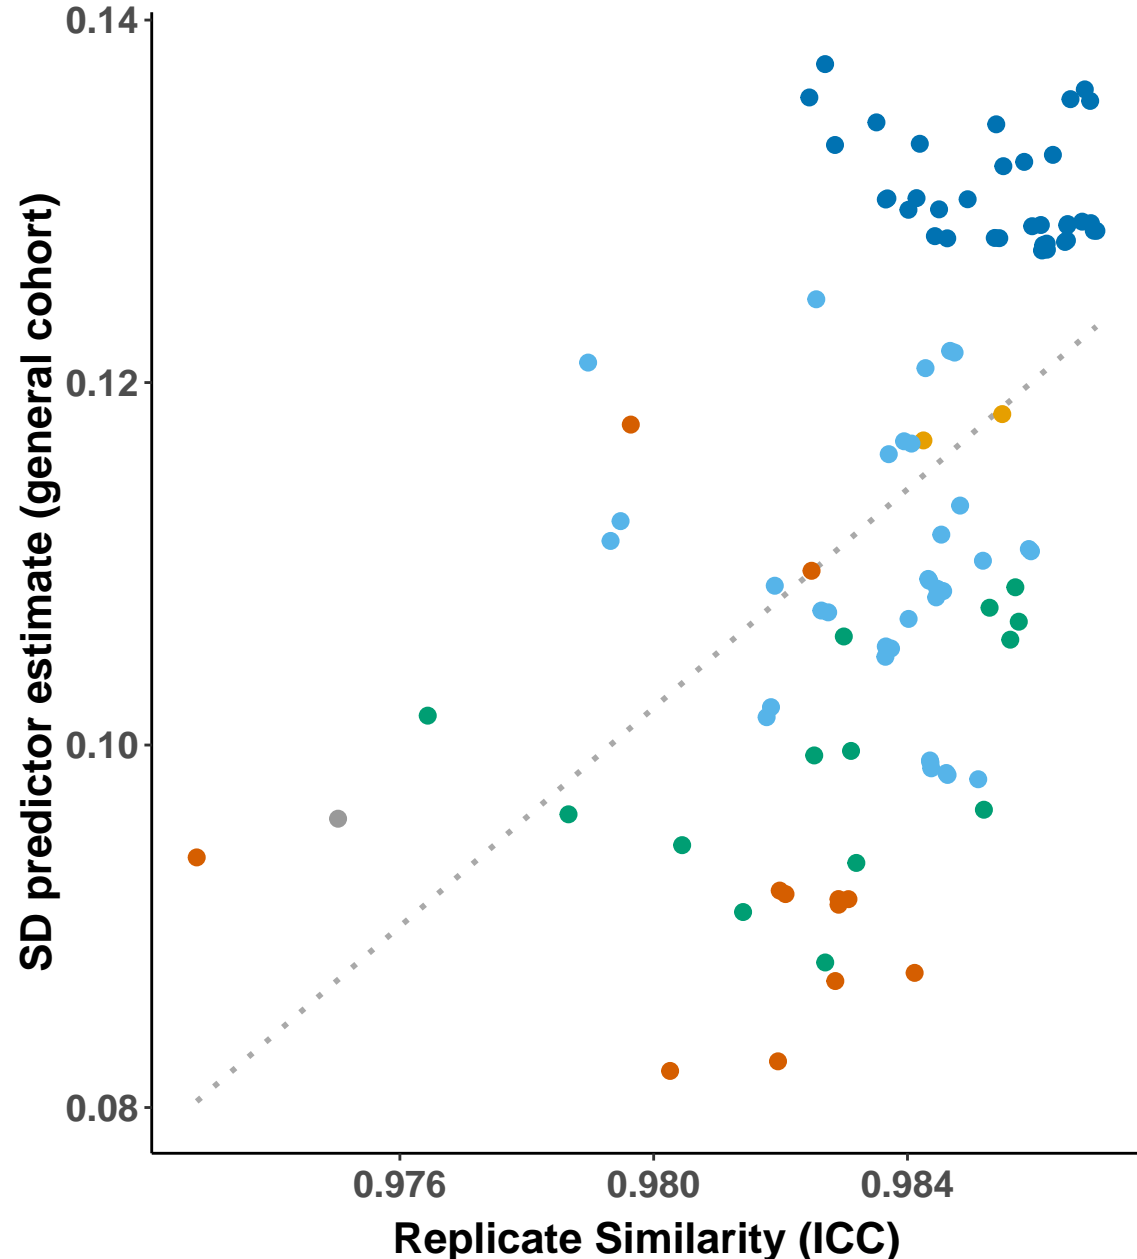

● Raw data    ● ENmix\_RCP    ● Minfi  
● ENmix\_noRCP    ● Hybrid    ● Watermelon

# GDF\_15

$\rho = -0.56$ ,  $P = 1.11e-09$

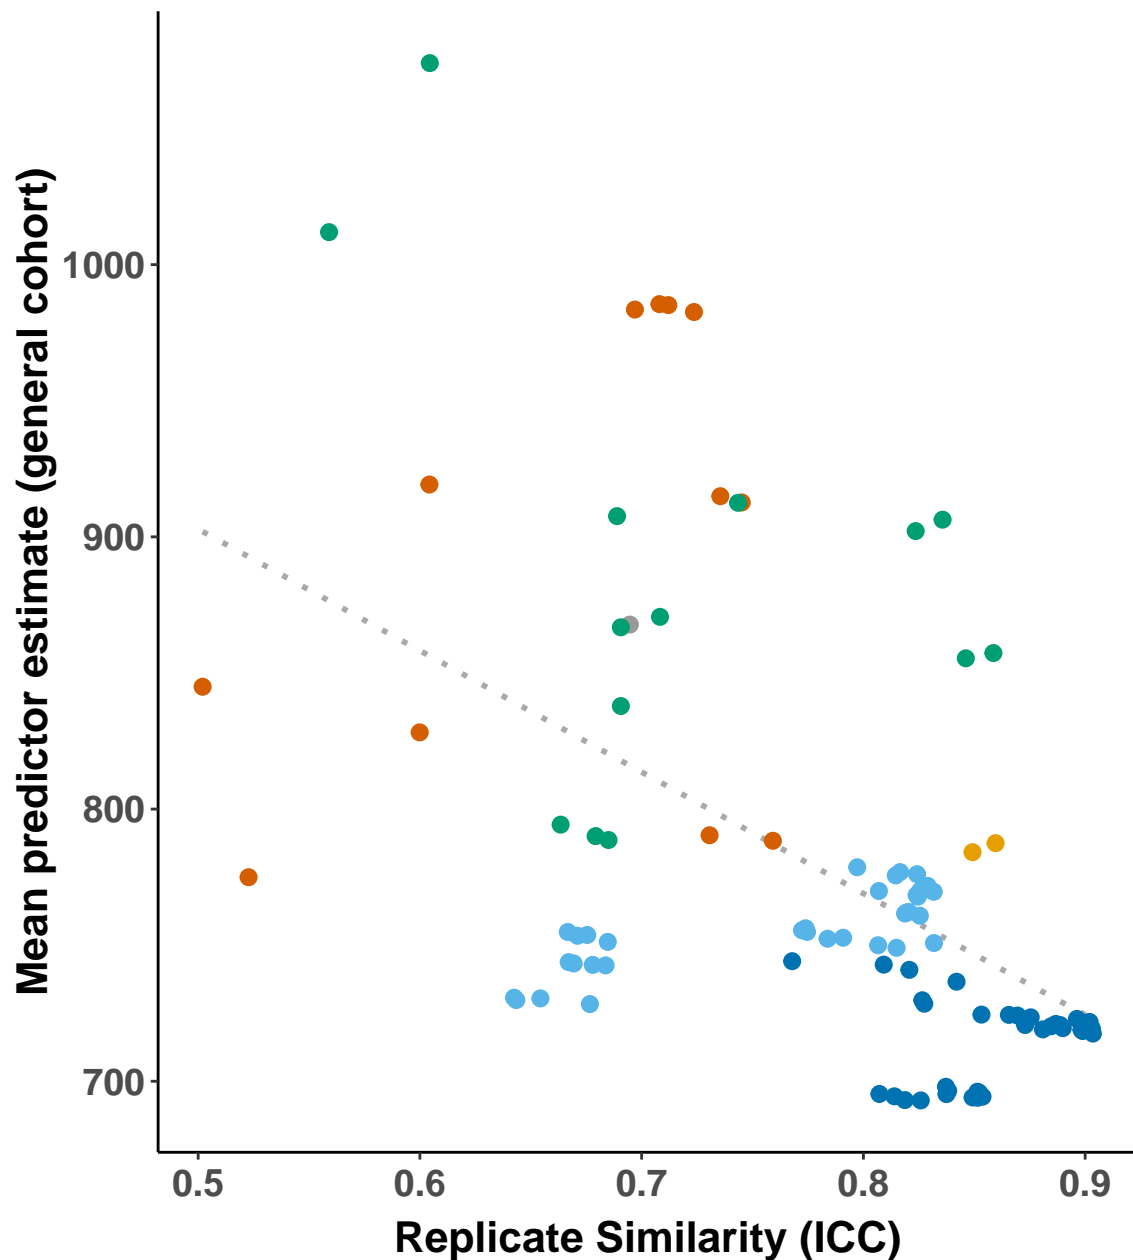

$\rho = -0.28$ ,  $P = 4.07e-03$

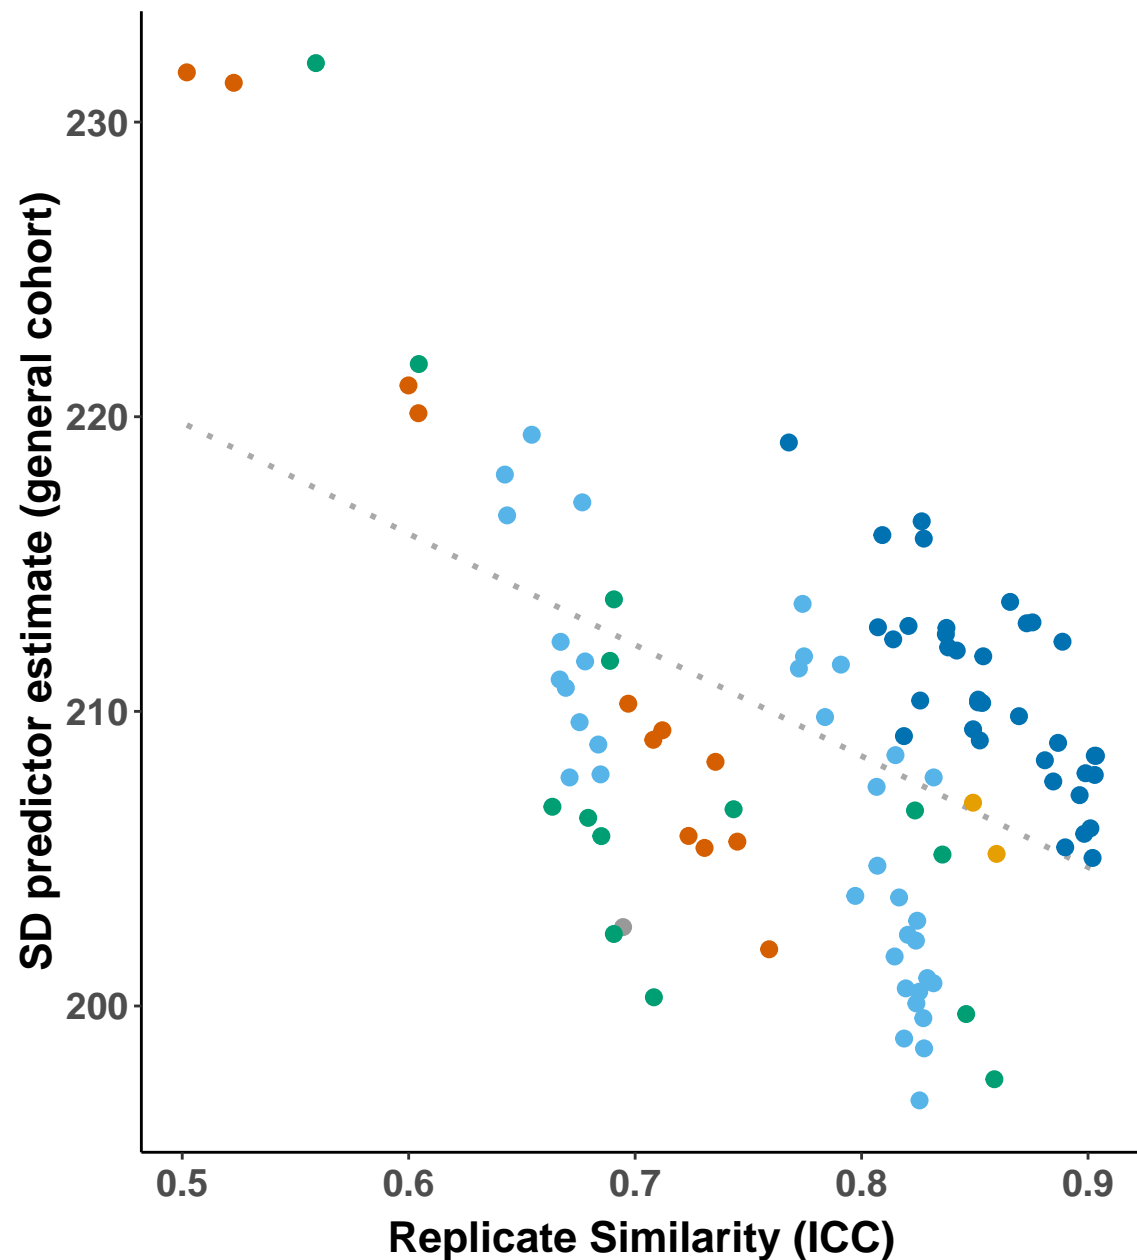

# B2M

$\rho = -0.37$ ,  $P = 1.42e-04$

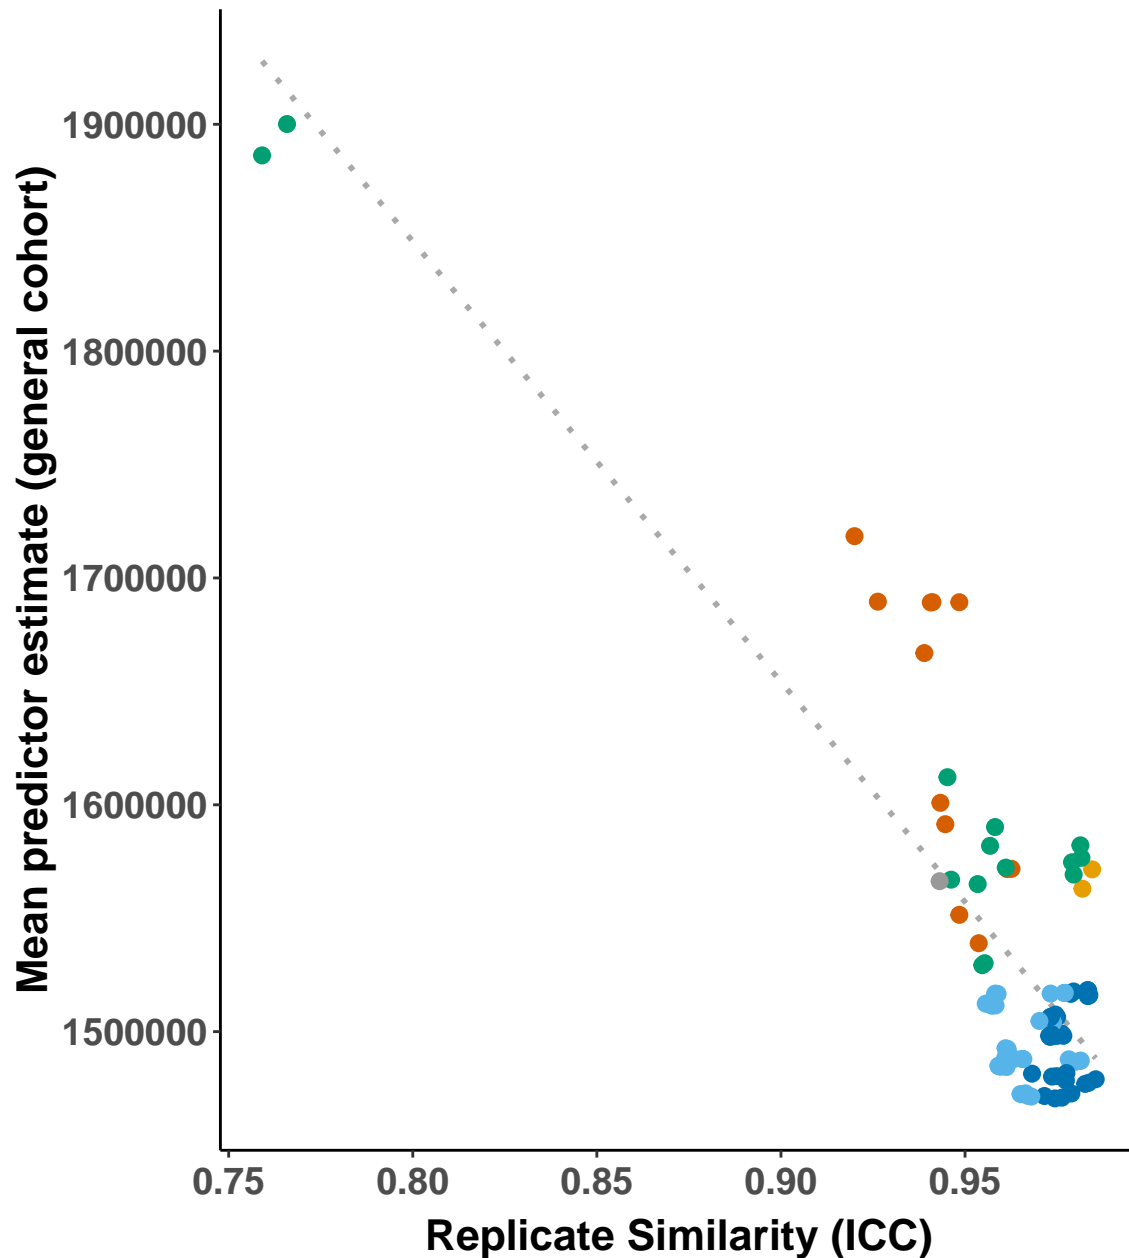

- Raw data
- ENmix\_RCP
- Minfi
- ENmix\_noRCP
- Hybrid
- WaterRmelon

$\rho = 0.6$ ,  $P = 0e+00$

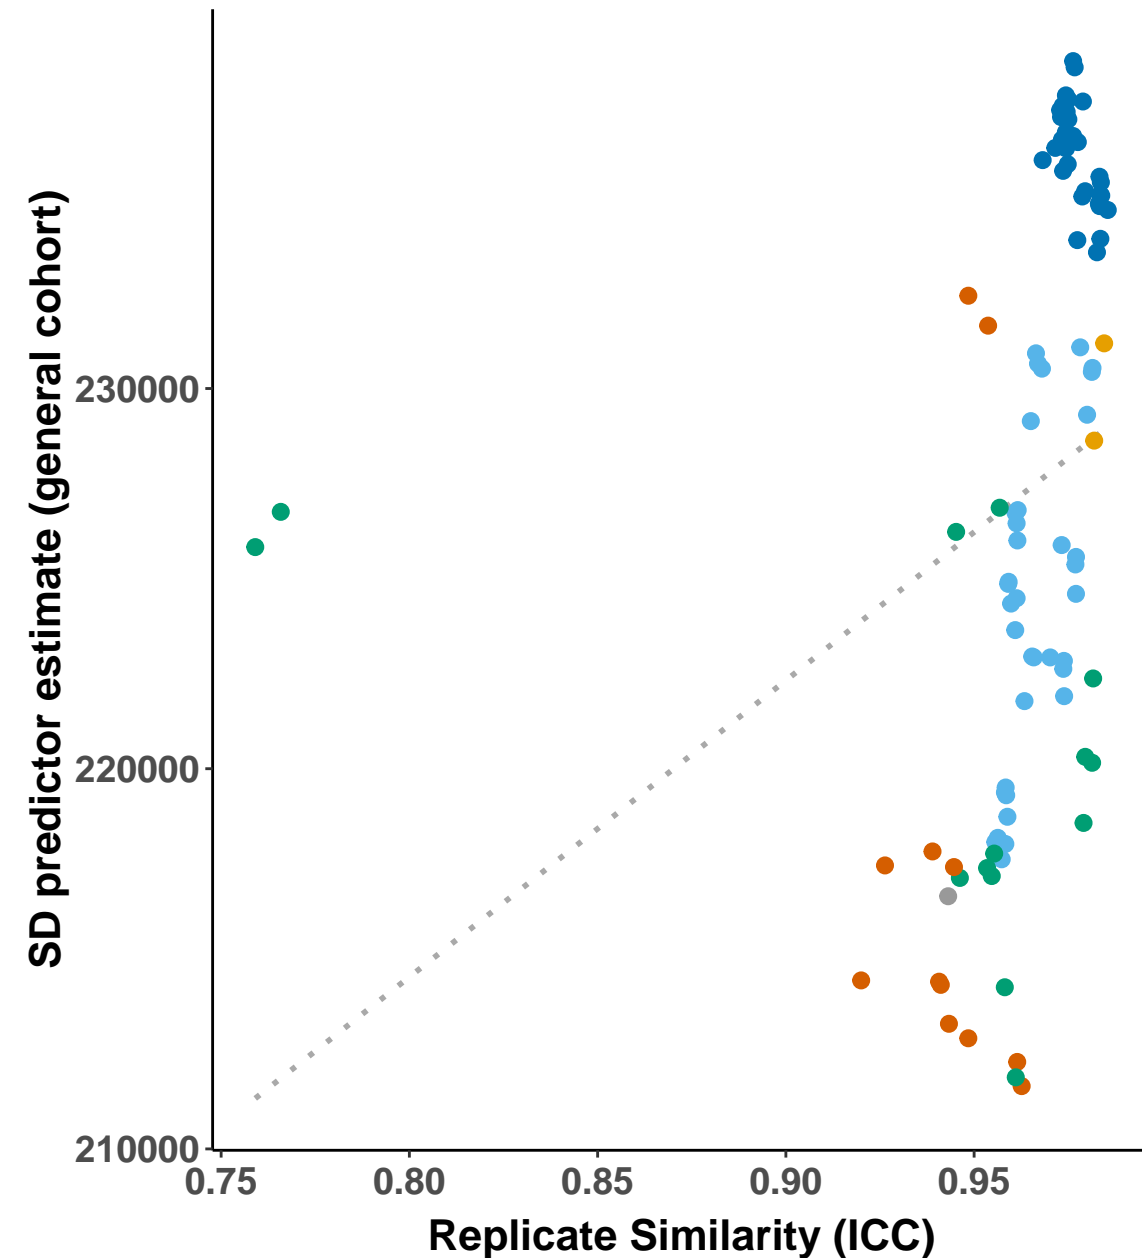

- Raw data
- ENmix\_RCP
- Minfi
- ENmix\_noRCP
- Hybrid
- WaterRmelon

# Cystatin\_C

$\rho = -0.78$ ,  $P = 0e+00$

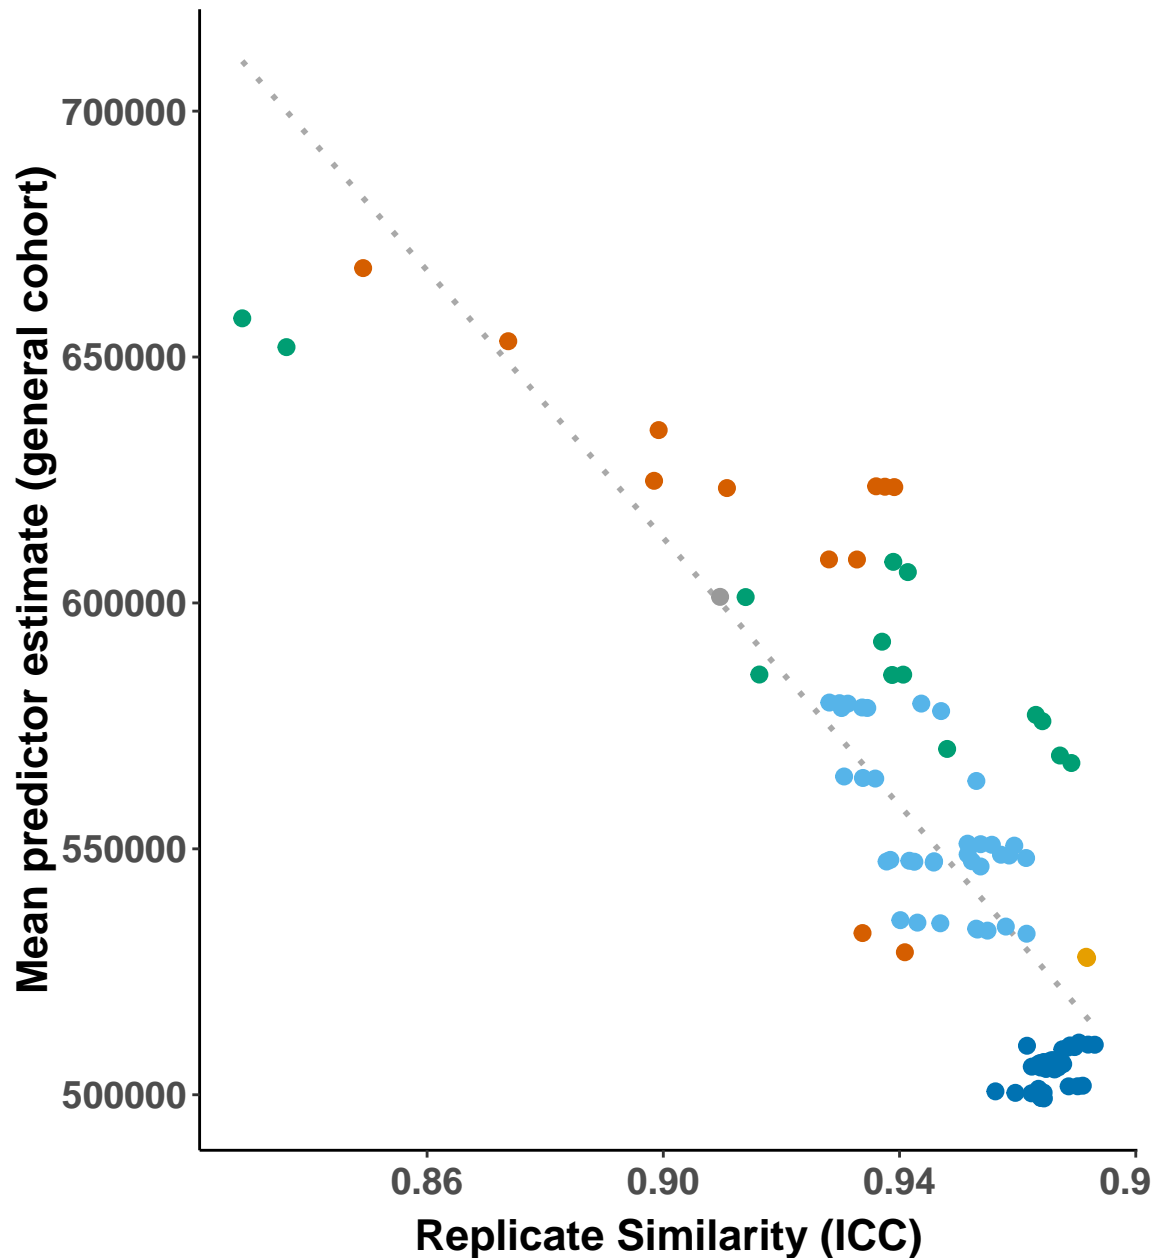

- Raw data
- ENmix\_RCP
- Minfi
- ENmix\_noRCP
- Hybrid
- WaterRmelon

$\rho = 0.71$ ,  $P = 0e+00$

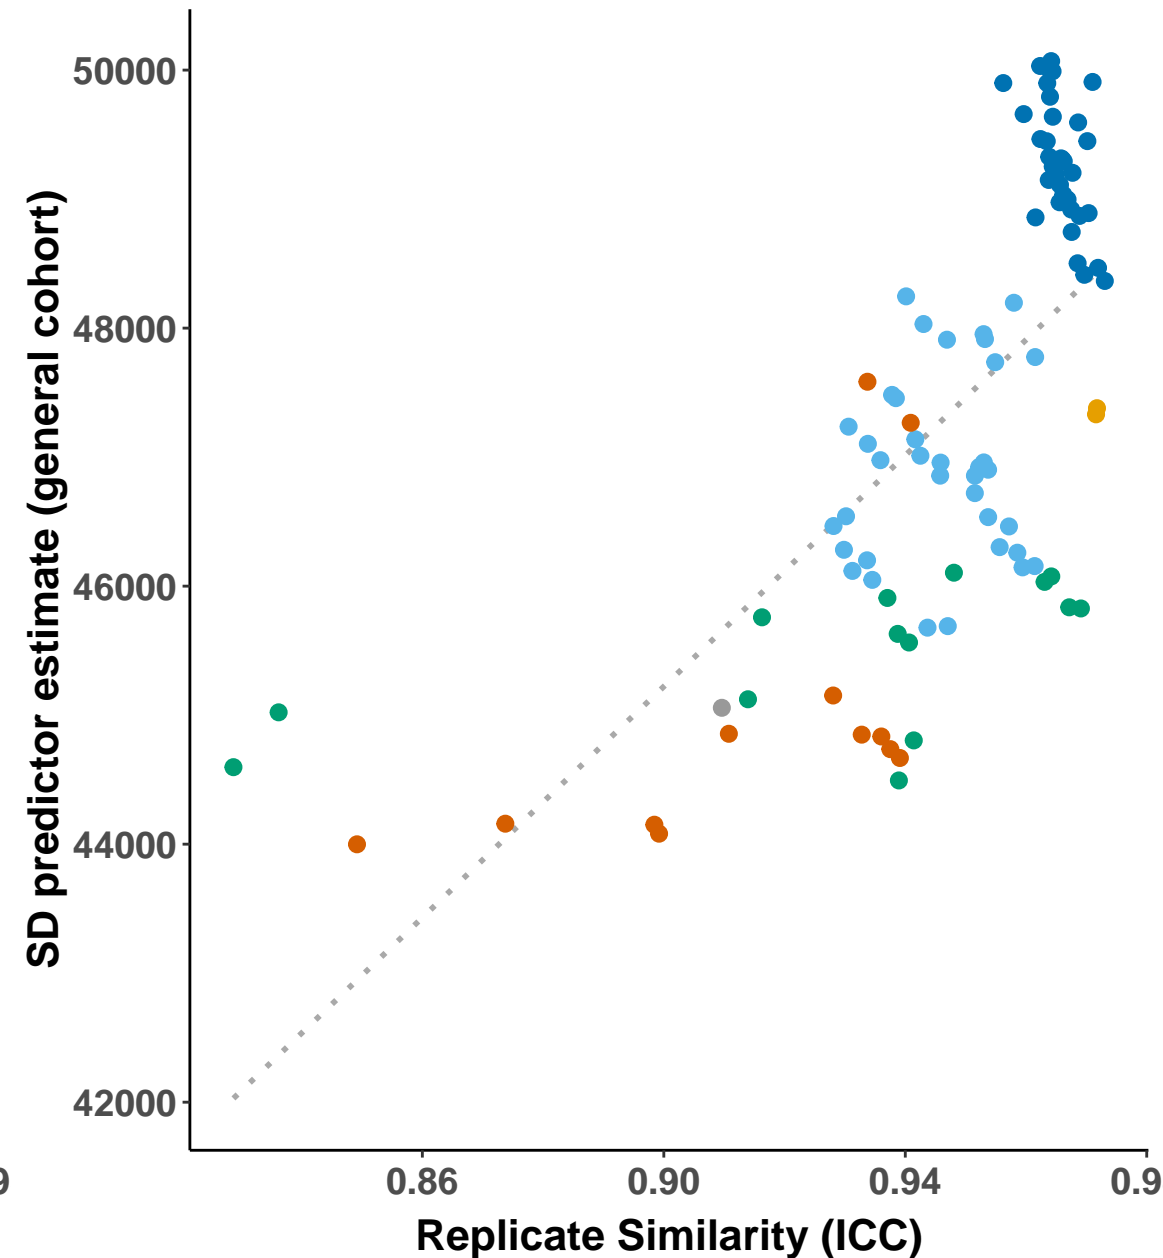

- Raw data
- ENmix\_RCP
- Minfi
- ENmix\_noRCP
- Hybrid
- WaterRmelon

TIMP\_1

$\rho=0.06$  ,  $P=5.55e-01$

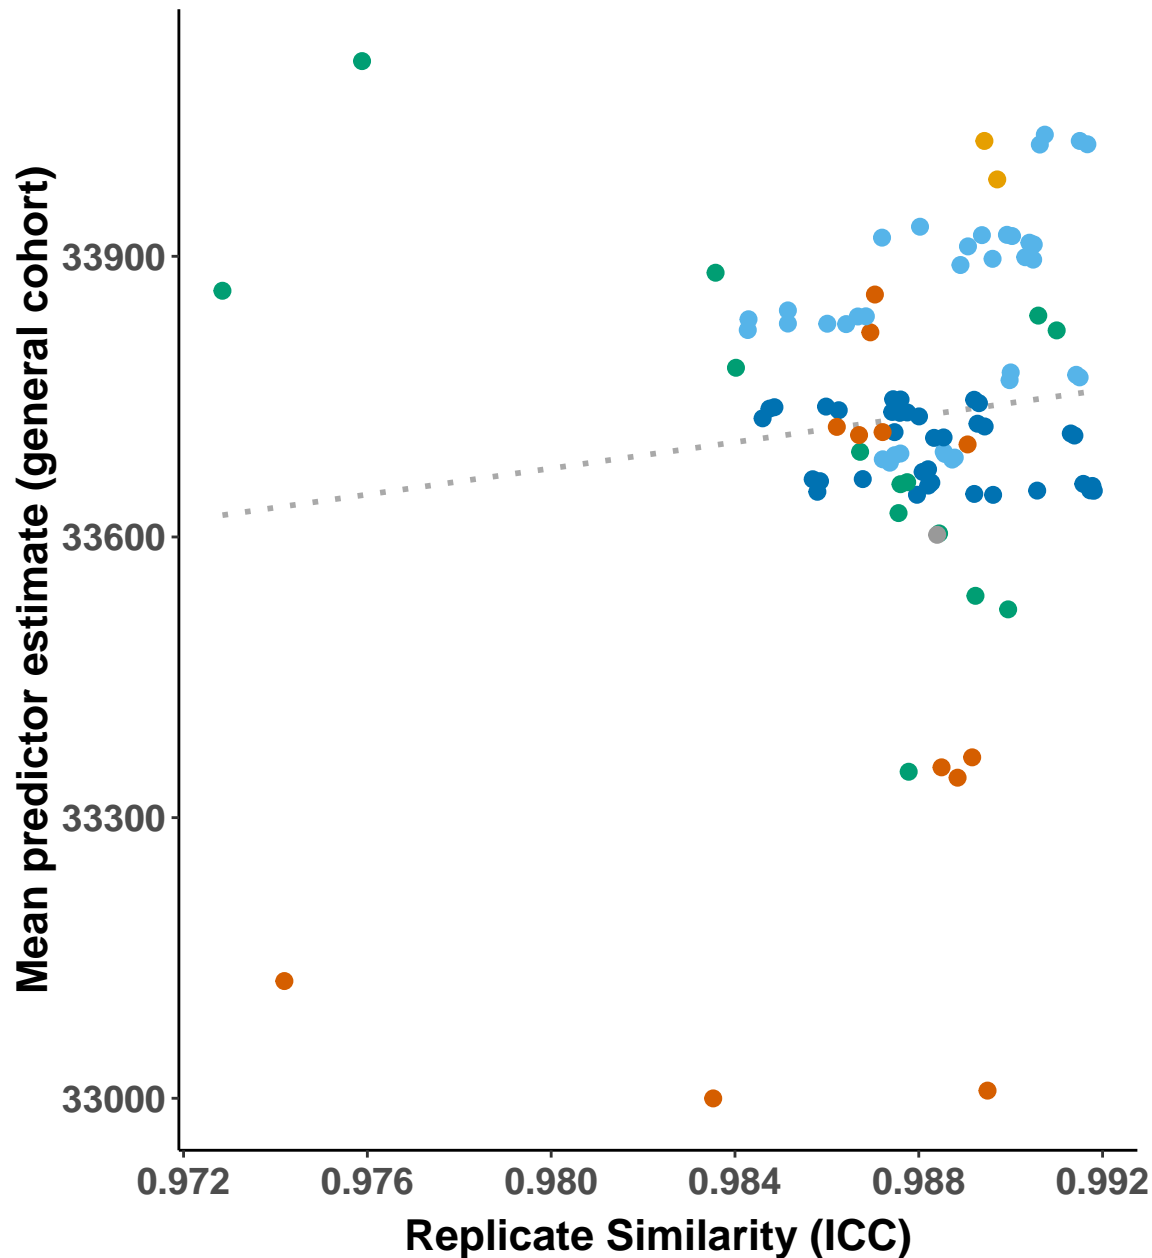

- Raw data
- ENmix\_RCP
- Minfi
- ENmix\_noRCP
- Hybrid
- WaterRmelon

$\rho=0.13$  ,  $P=2e-01$

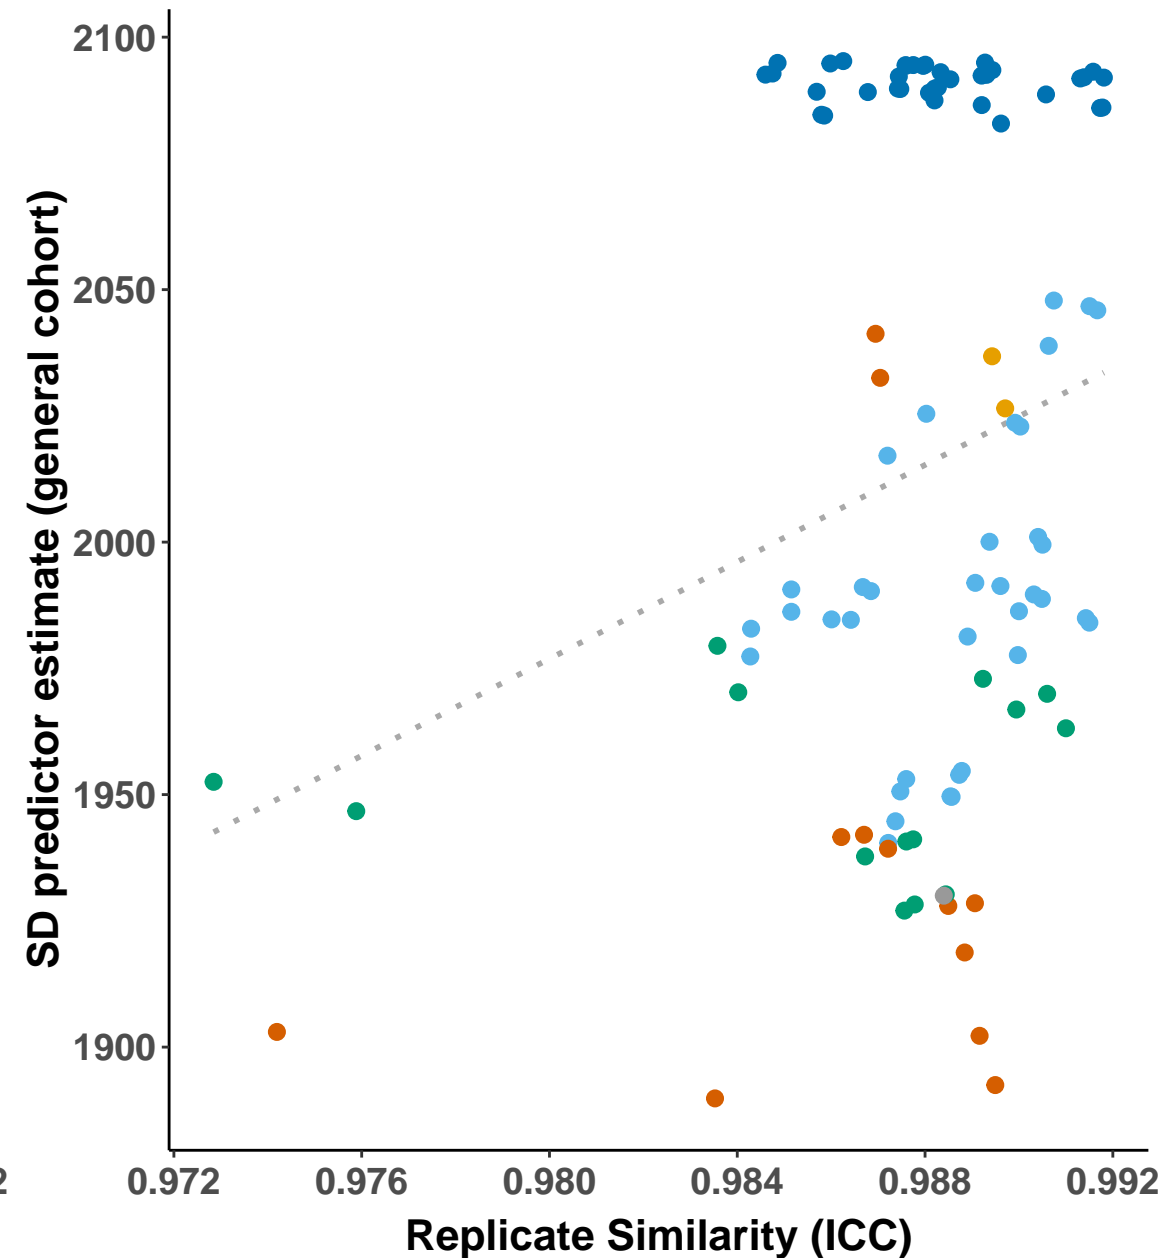

- Raw data
- ENmix\_RCP
- Minfi
- ENmix\_noRCP
- Hybrid
- WaterRmelon



## ADM

 $\rho = -0.39$ ,  $P = 6.26e-05$ 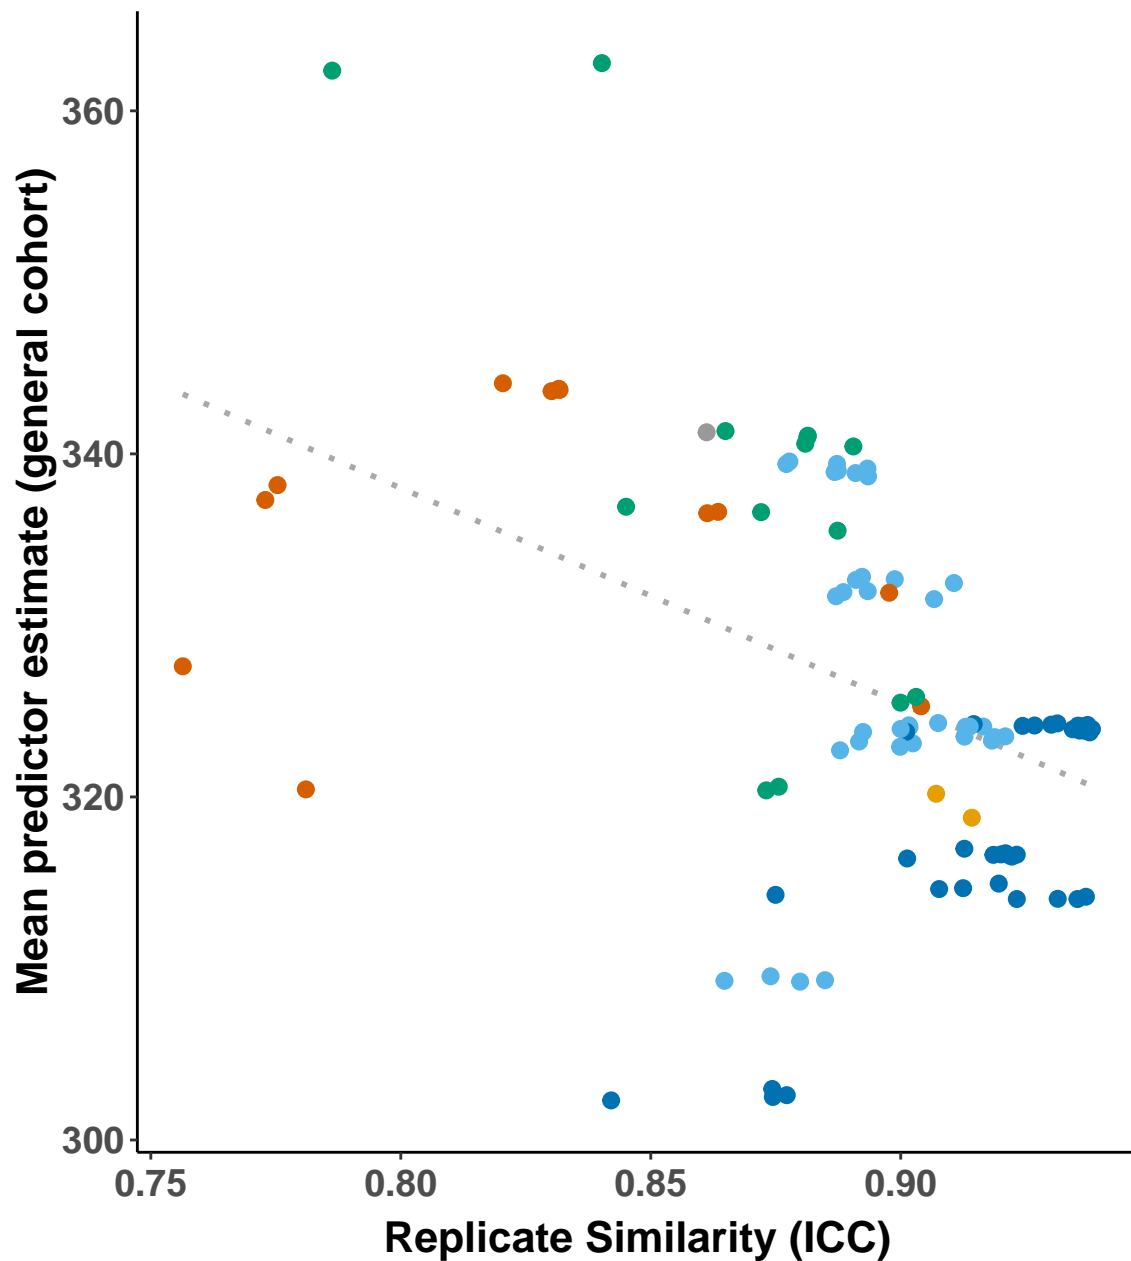 $\rho = 0.29$ ,  $P = 2.9e-03$ 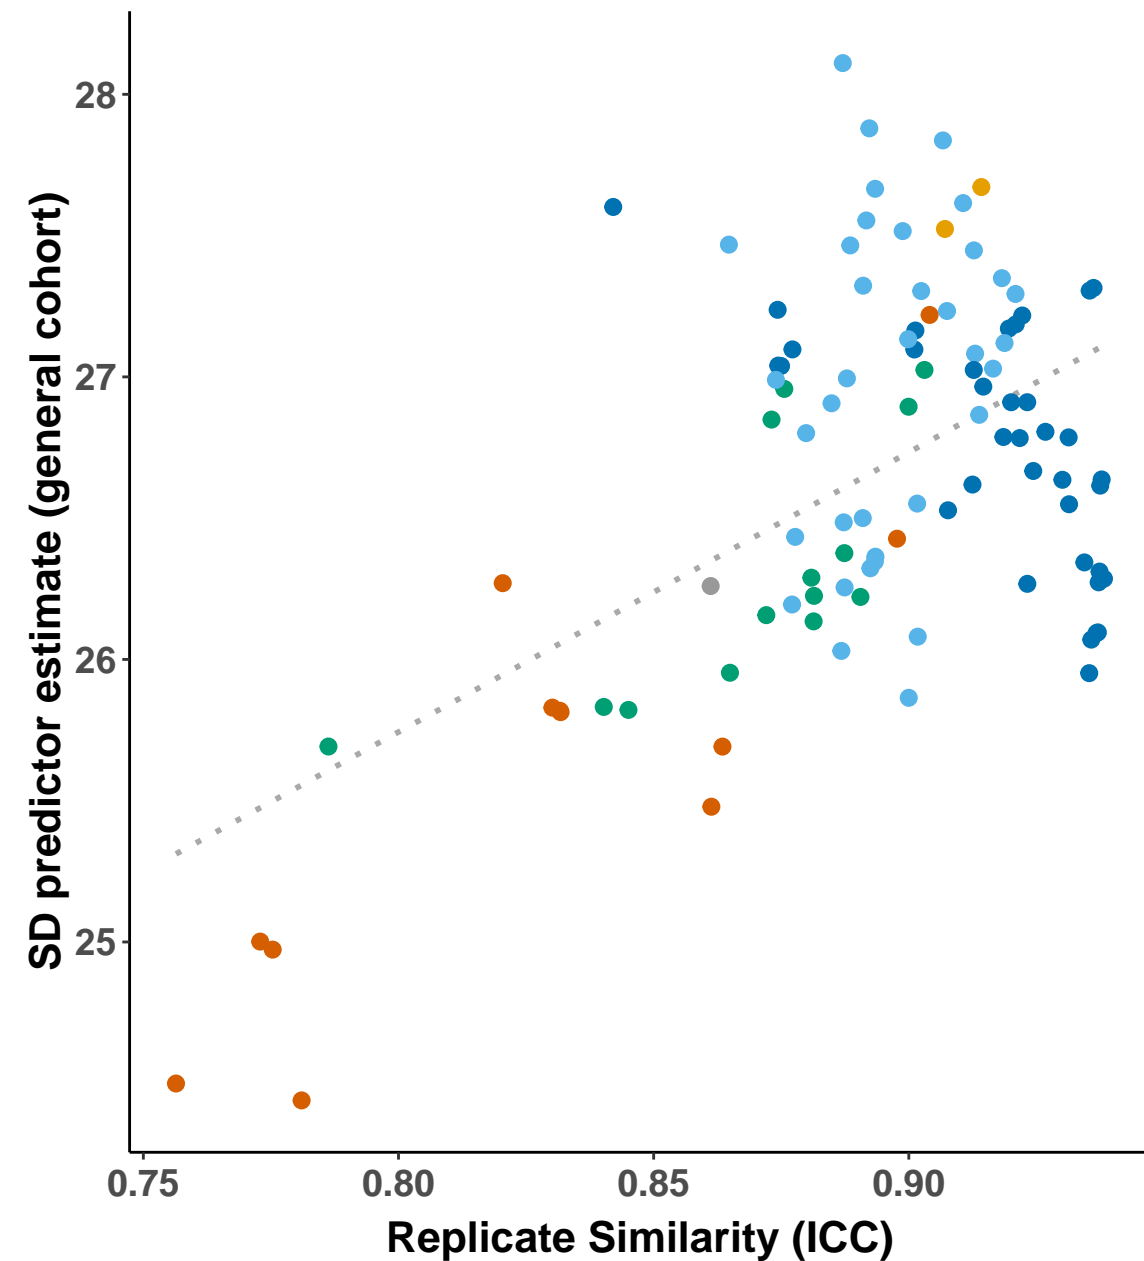

PAI\_1

$\rho=0.23$ ,  $P=2.17e-02$

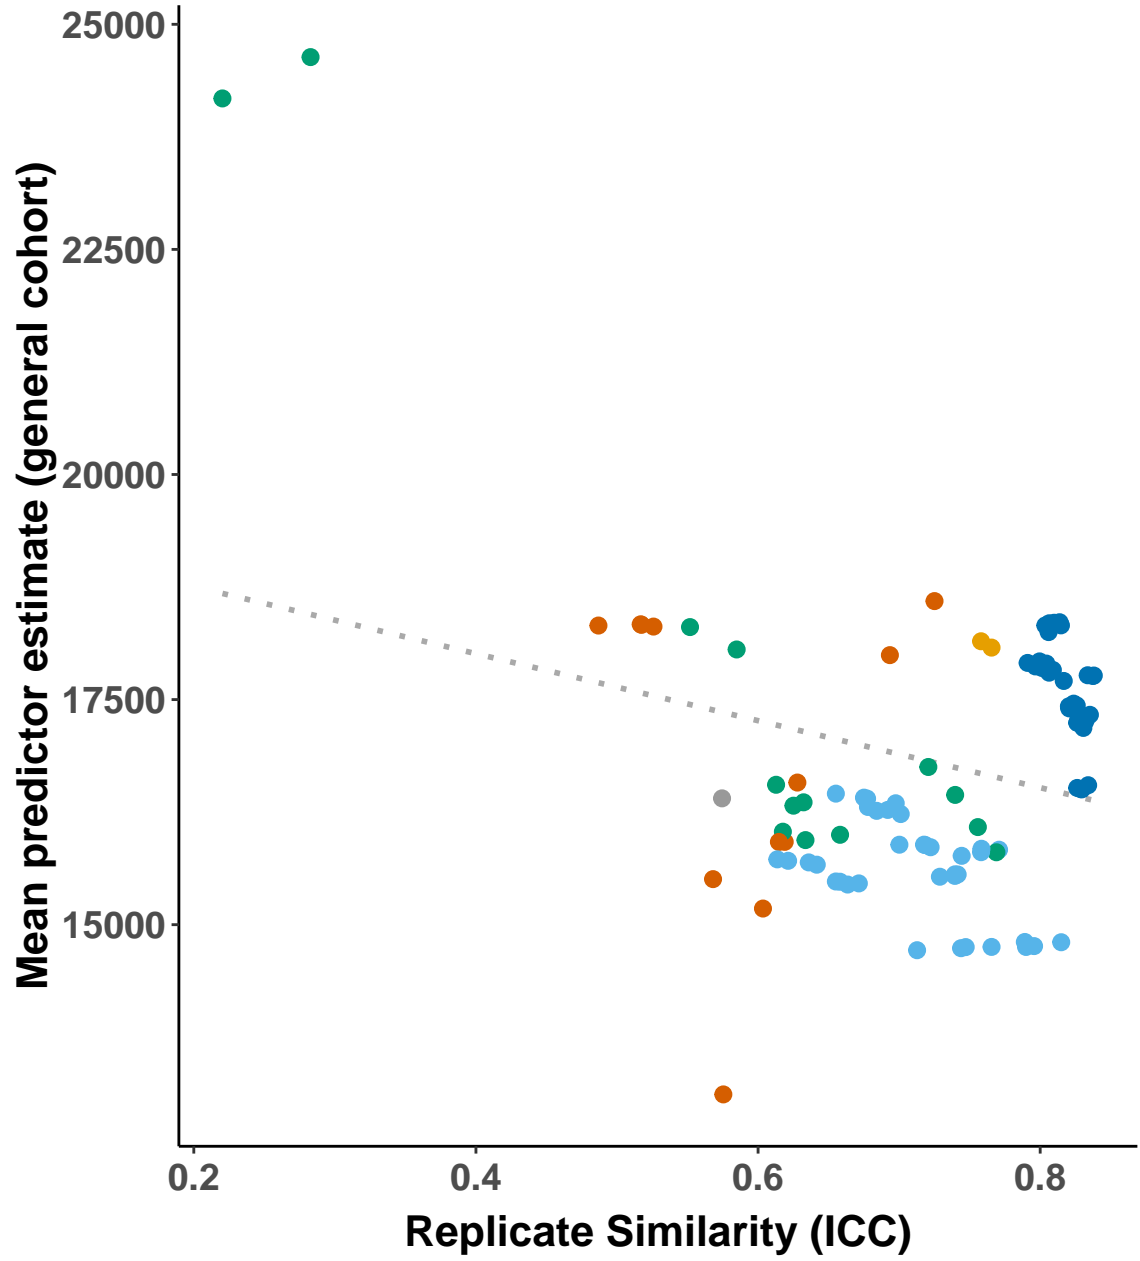

$\rho=-0.22$ ,  $P=2.79e-02$

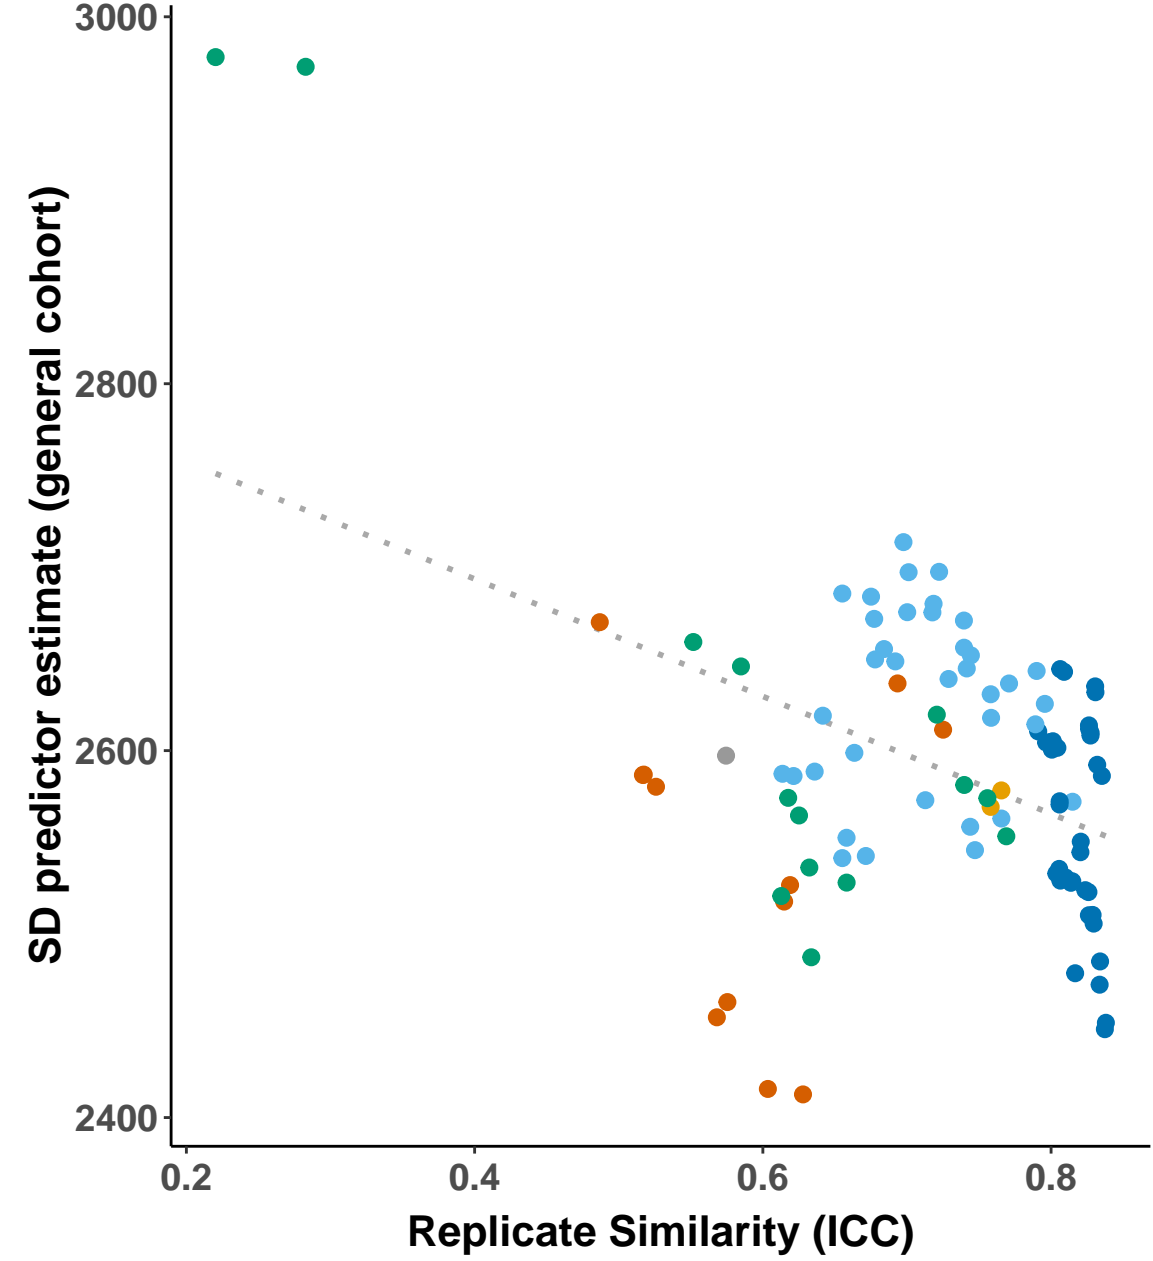

# Leptin

$\rho = -0.56$ ,  $P = 1.01e-09$

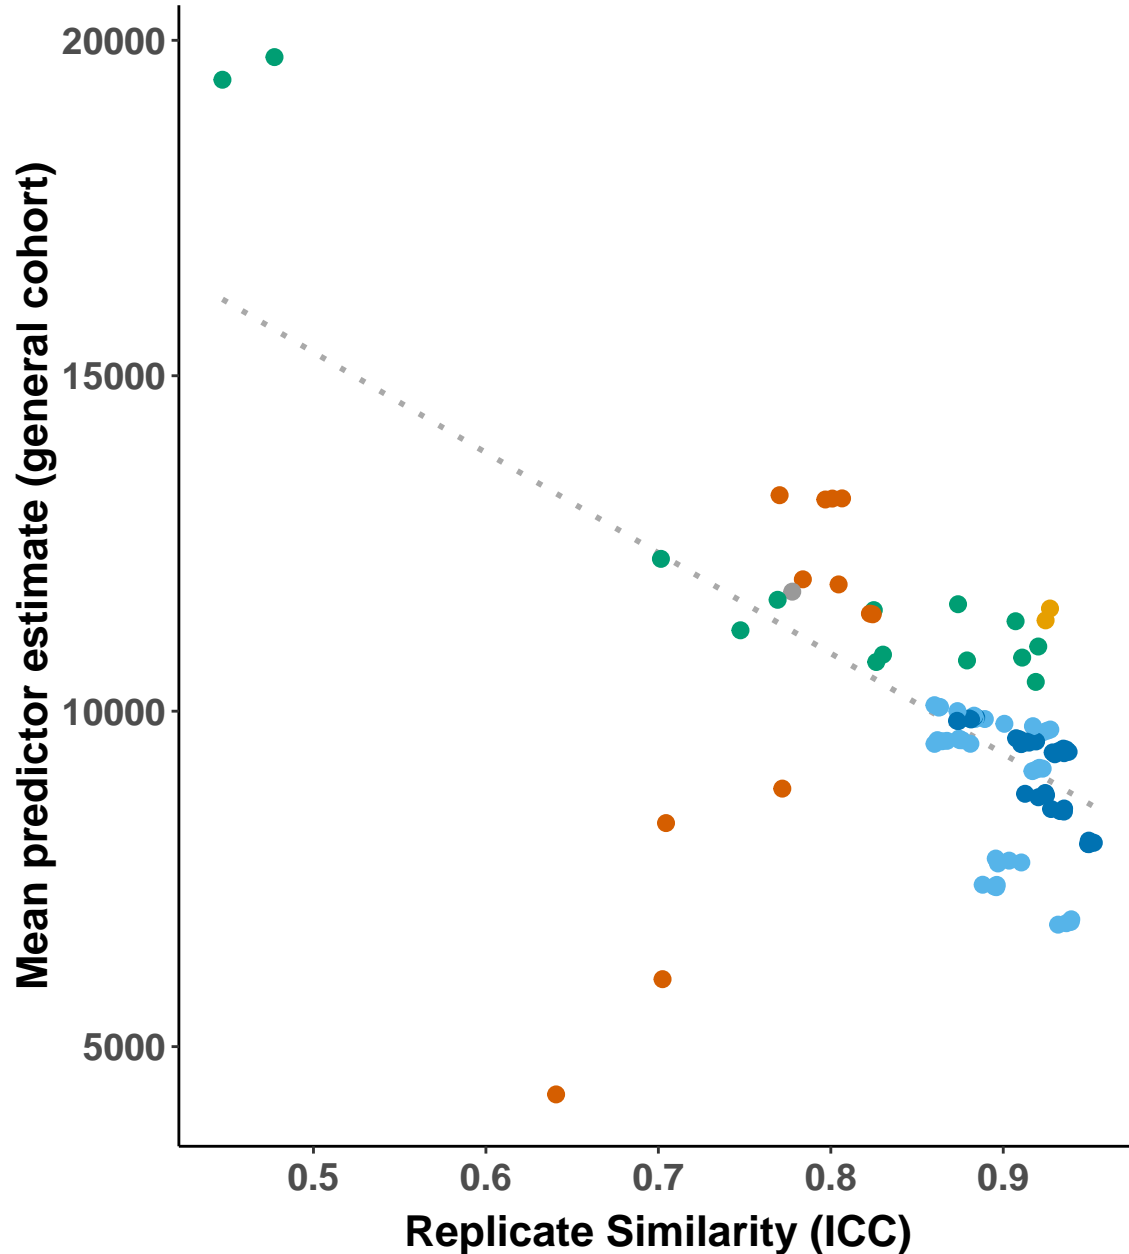

- Raw data
- ENmix\_RCP
- Minfi
- ENmix\_noRCP
- Hybrid
- WaterRmelon

$\rho = -0.56$ ,  $P = 2.62e-09$

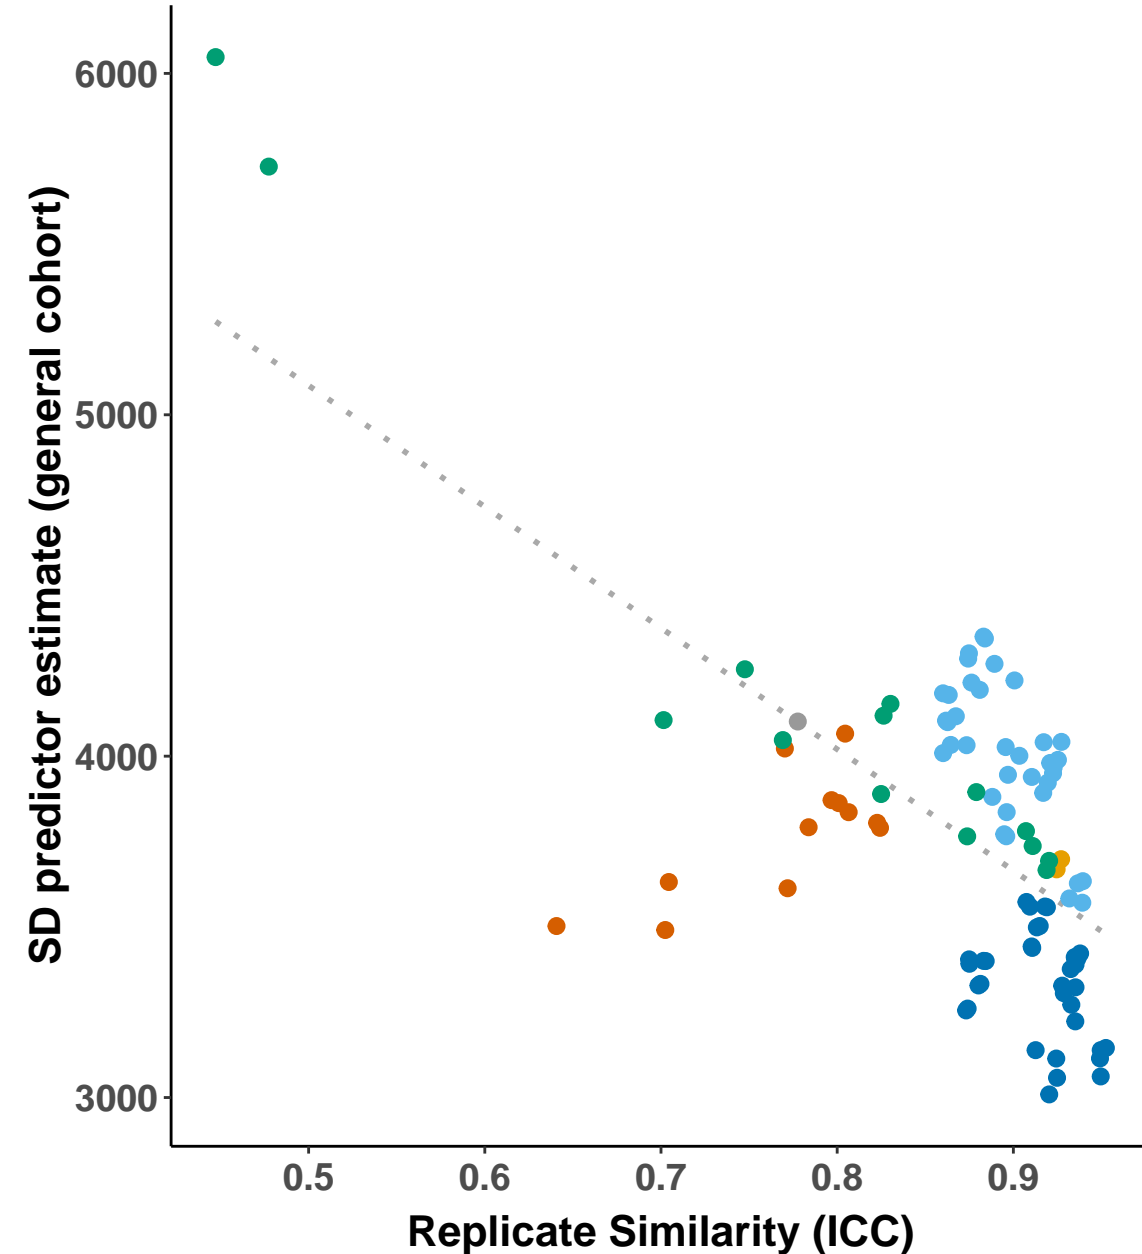

- Raw data
- ENmix\_RCP
- Minfi
- ENmix\_noRCP
- Hybrid
- WaterRmelon

# Smoking\_Lu

$\rho = -0.79$ ,  $P = 0e+00$

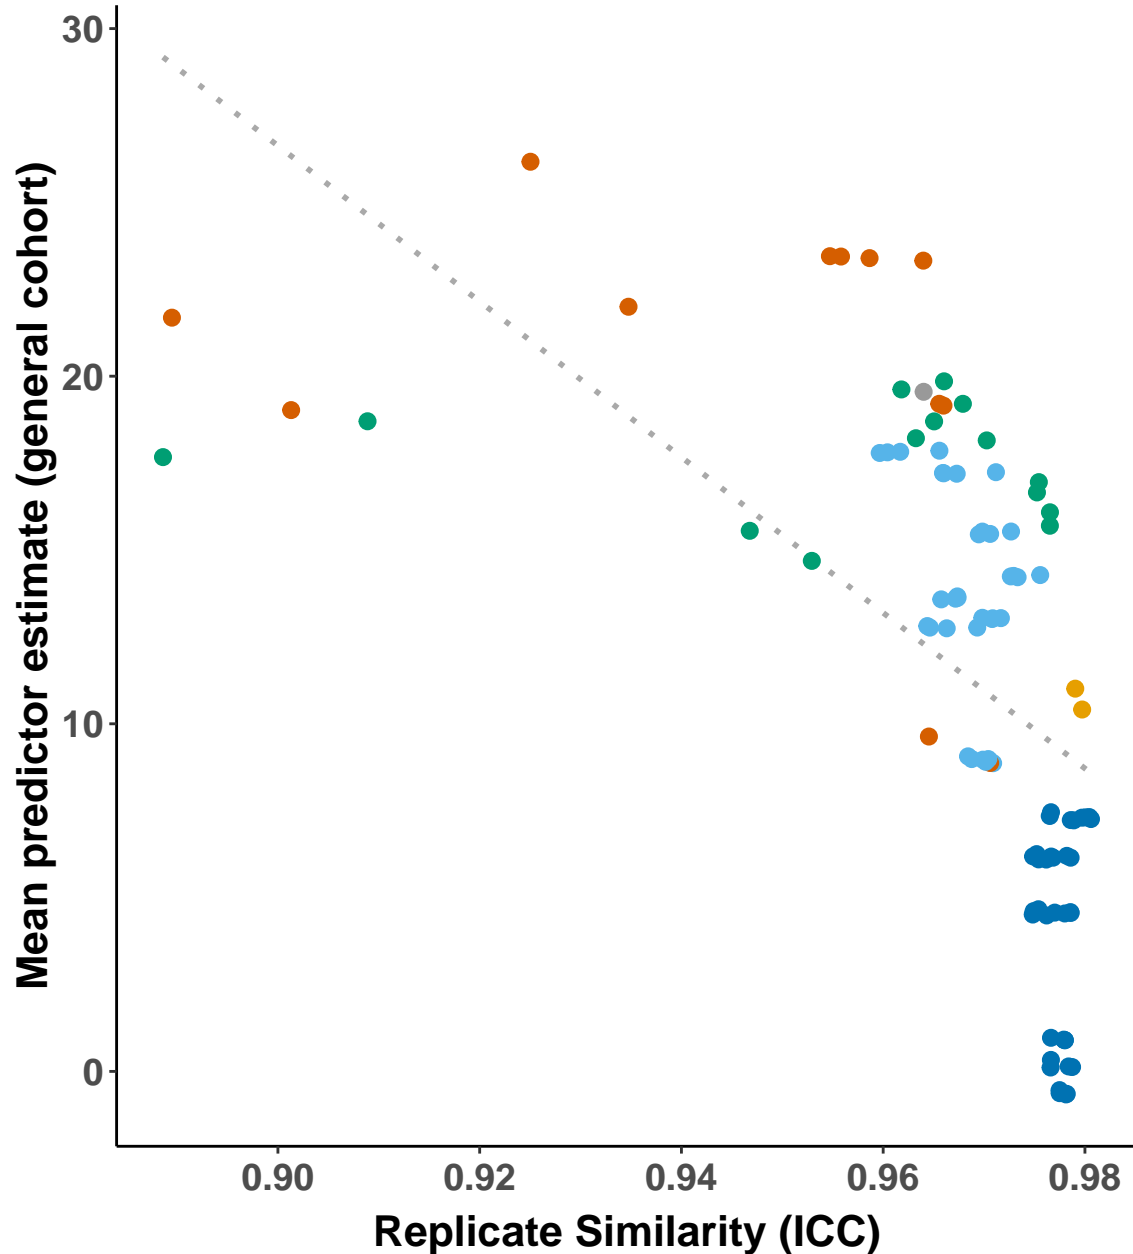

- Raw data
- ENmix\_RCP
- Minfi
- ENmix\_noRCP
- Hybrid
- WaterRmelon

$\rho = 0.76$ ,  $P = 0e+00$

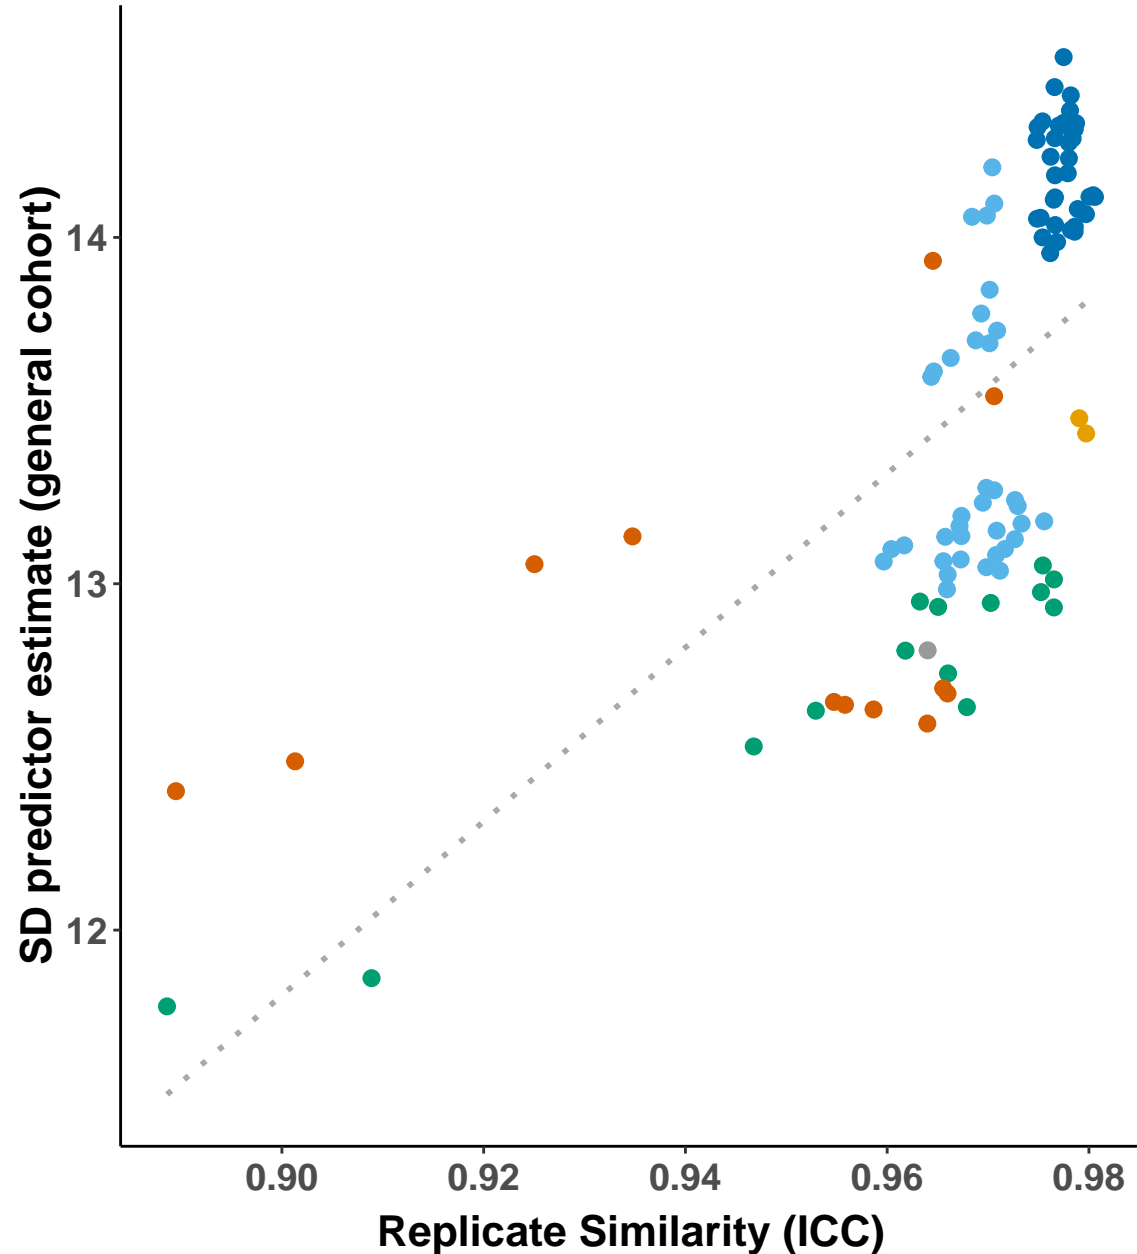

- Raw data
- ENmix\_RCP
- Minfi
- ENmix\_noRCP
- Hybrid
- WaterRmelon

# PlasmaBlast

$\rho=0.2$  ,  $P=4.73e-02$

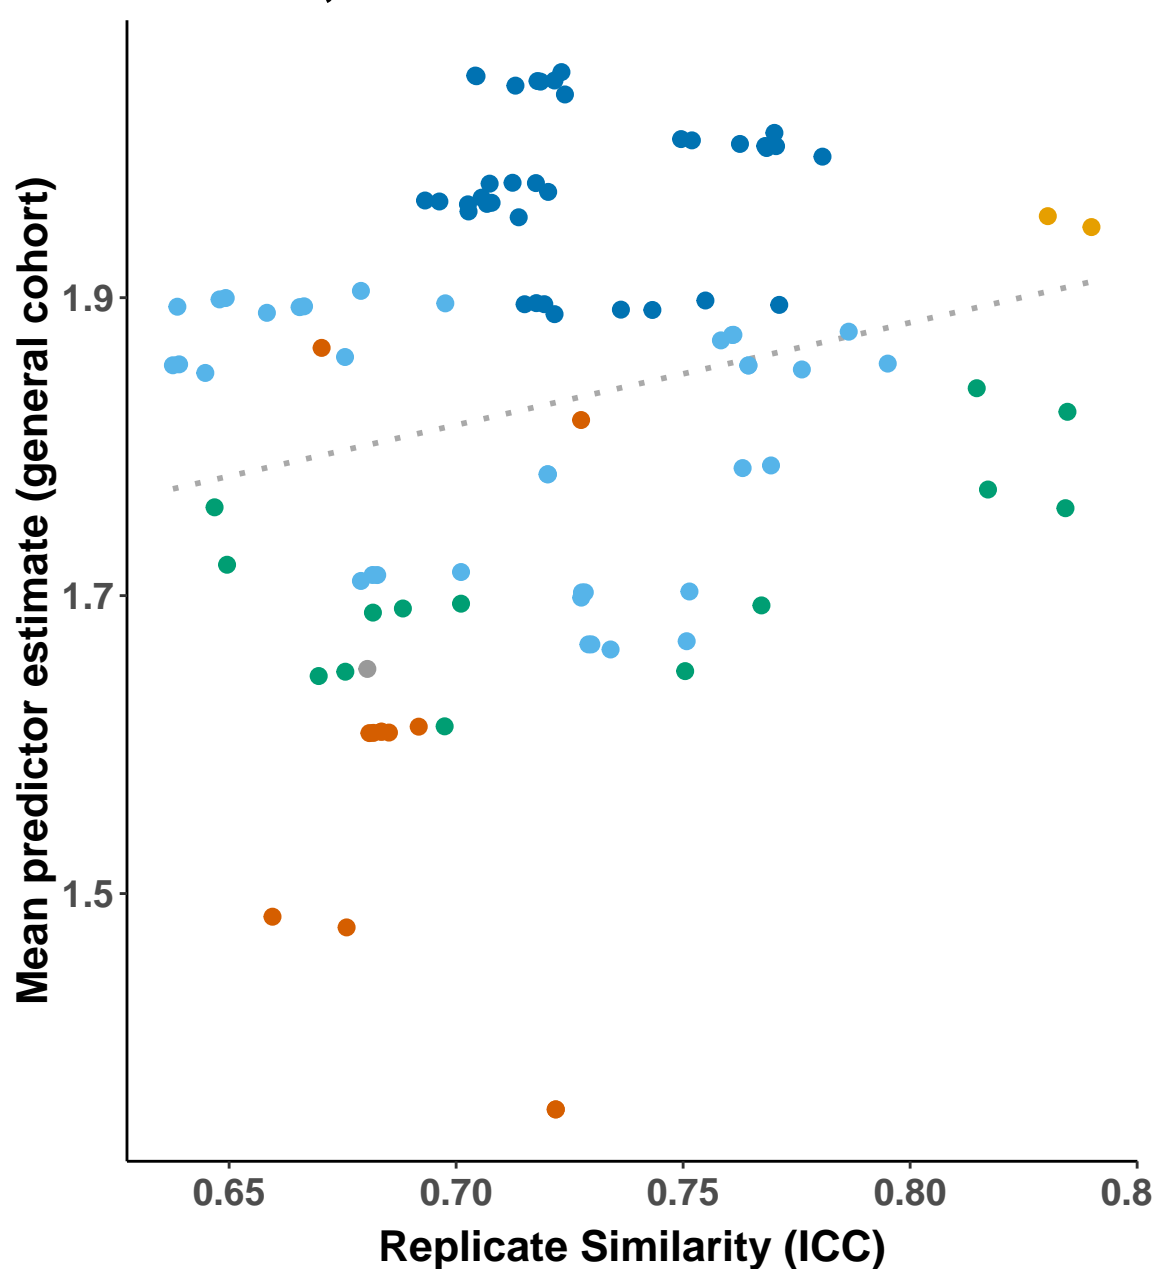

- Raw data
- ENmix\_RCP
- Minfi
- ENmix\_noRCP
- Hybrid
- WaterRmelon

$\rho=0.27$  ,  $P=6.79e-03$

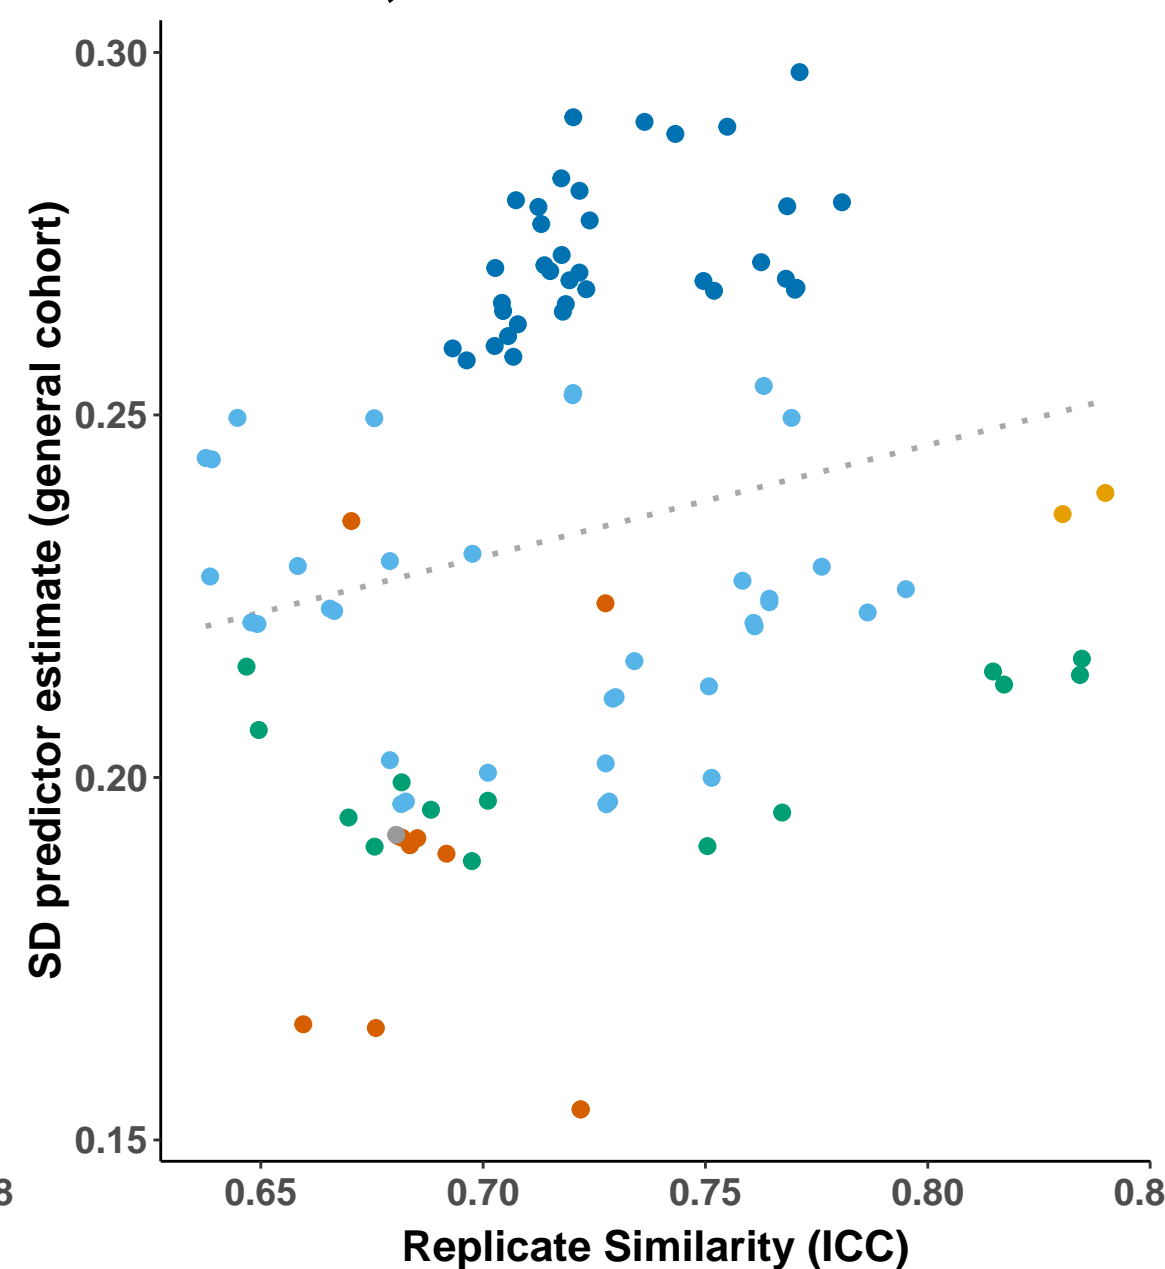

- Raw data
- ENmix\_RCP
- Minfi
- ENmix\_noRCP
- Hybrid
- WaterRmelon

# CD8pCD28nCD45RAn

$\rho=0.65$  ,  $P=0e+00$

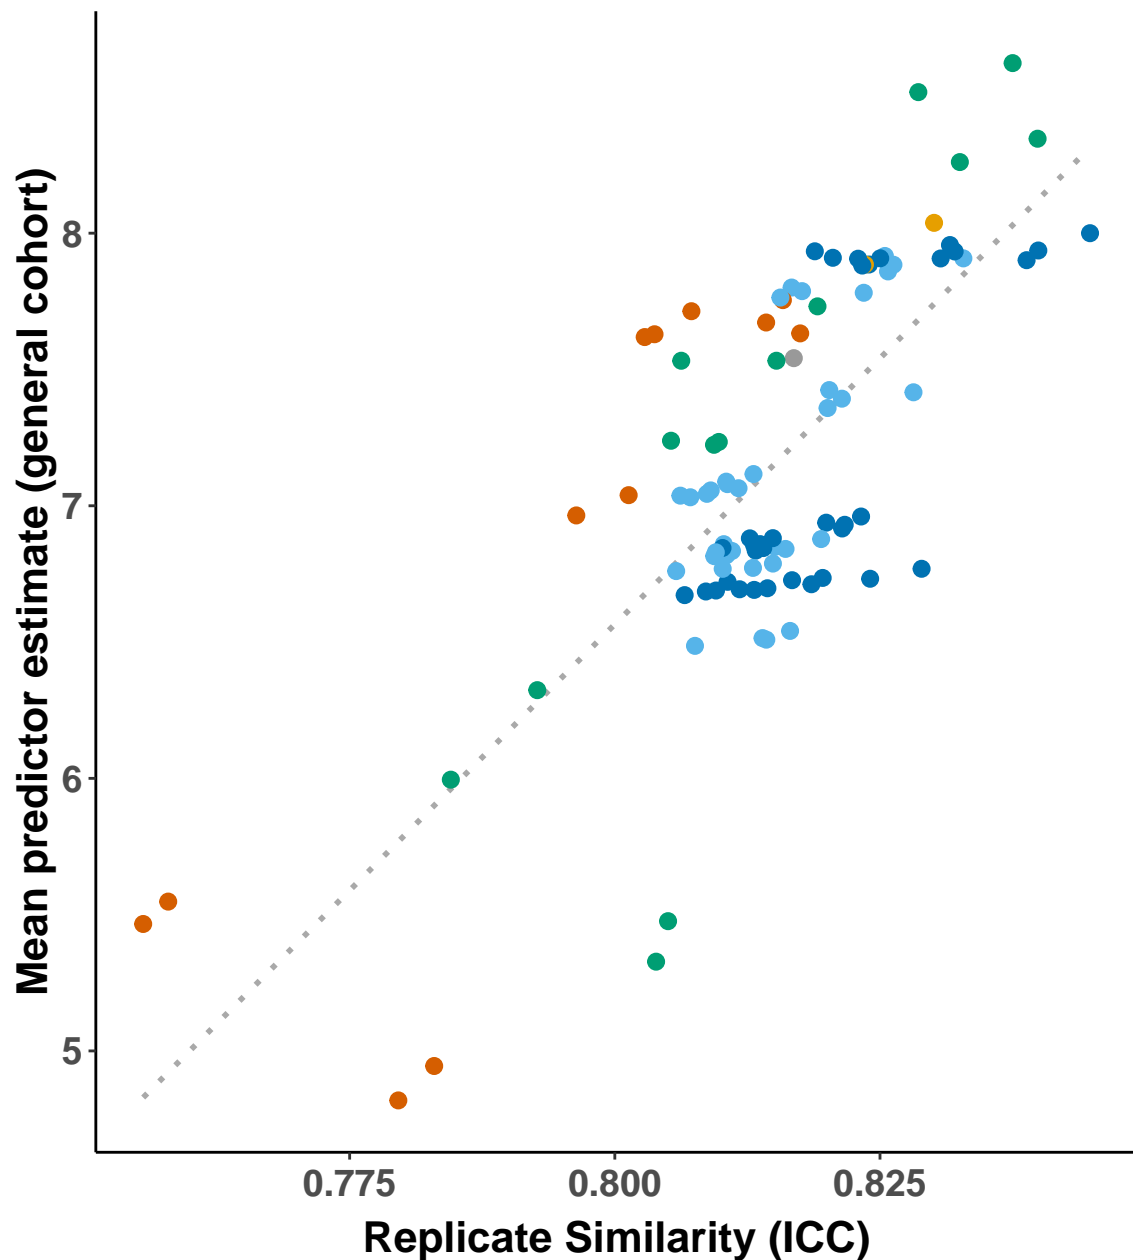

● Raw data    ● ENmix\_RCP    ● Minfi  
● ENmix\_noRCP    ● Hybrid    ● WaterRmelon

$\rho=0.45$  ,  $P=3.79e-06$

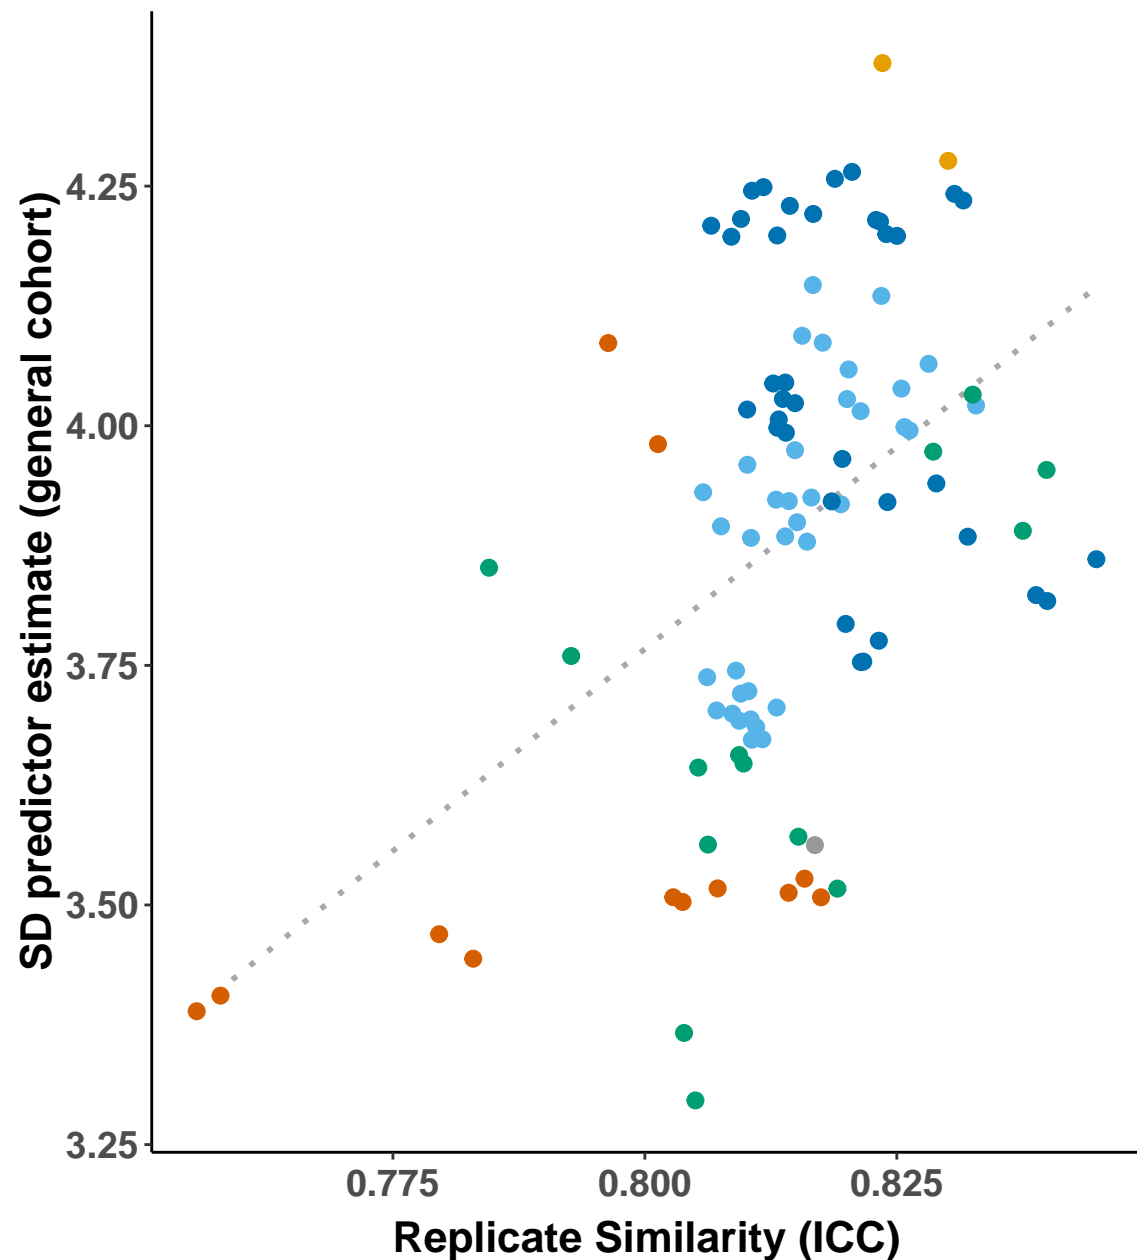

● Raw data    ● ENmix\_RCP    ● Minfi  
● ENmix\_noRCP    ● Hybrid    ● WaterRmelon

CD8naive

$\rho = -0.35, P = 3.16e-04$

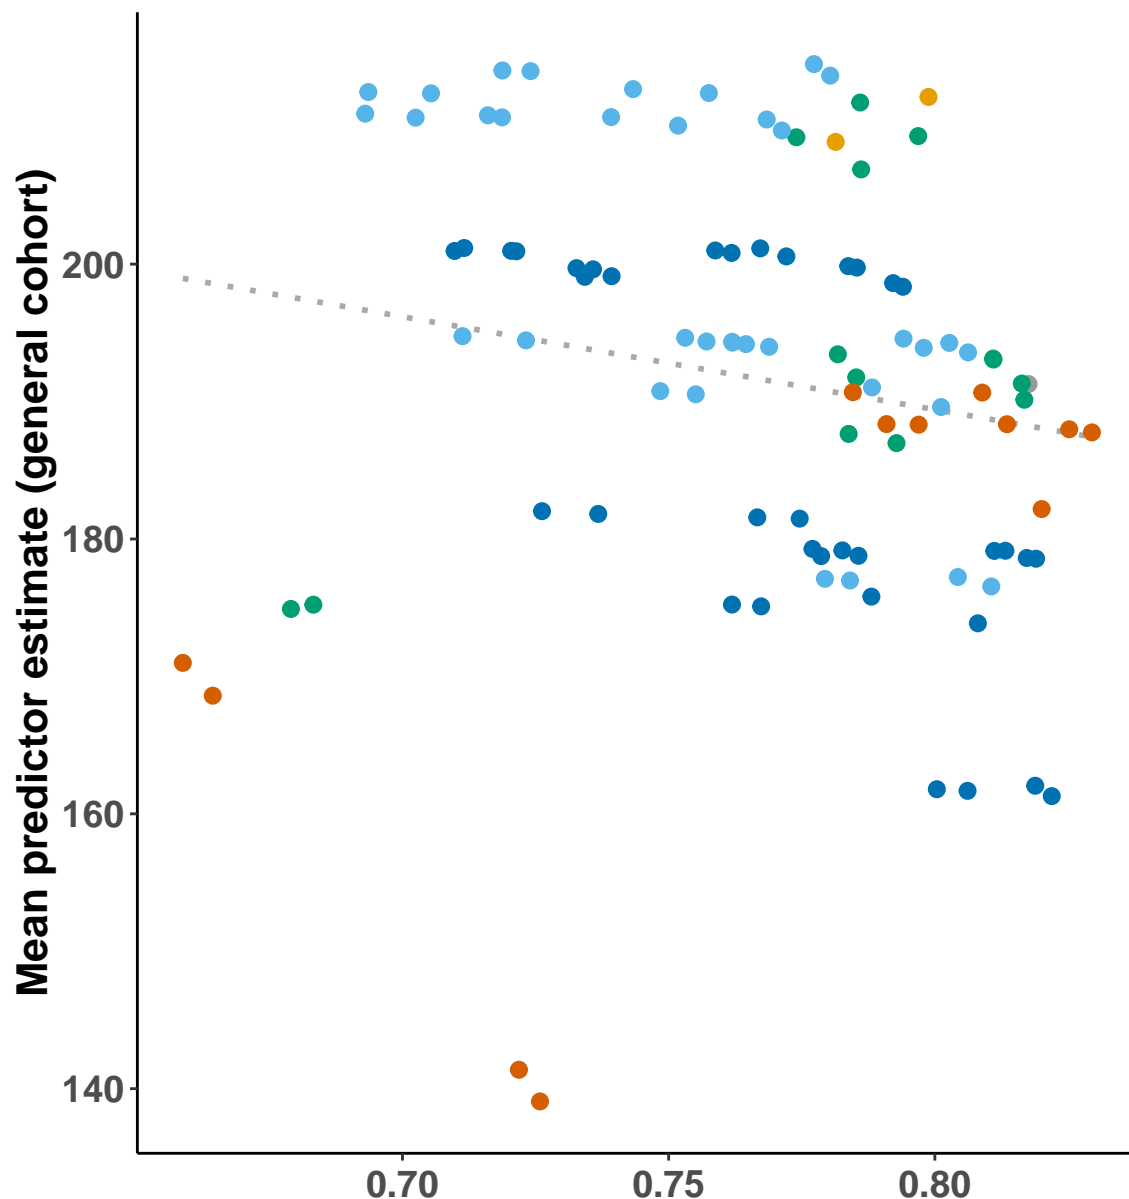

- Raw data
- ENmix\_RCP
- Minfi
- ENmix\_noRCP
- Hybrid
- WaterRmelon

$\rho = -0.49, P = 3.81e-07$

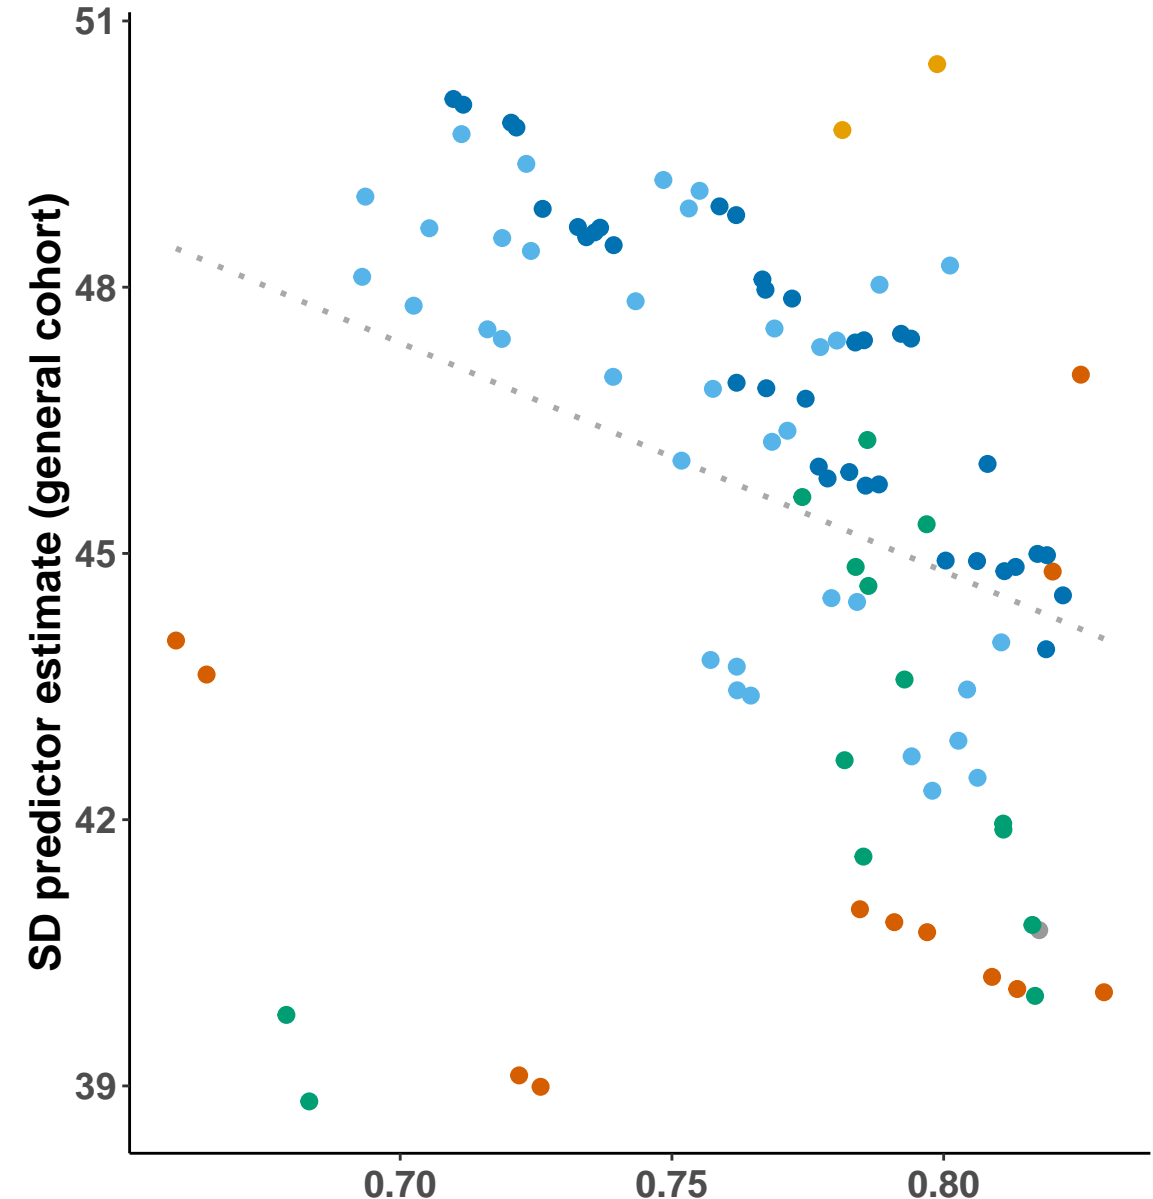

- Raw data
- ENmix\_RCP
- Minfi
- ENmix\_noRCP
- Hybrid
- WaterRmelon

# GrimAge

$\rho = -0.78$ ,  $P = 0e+00$

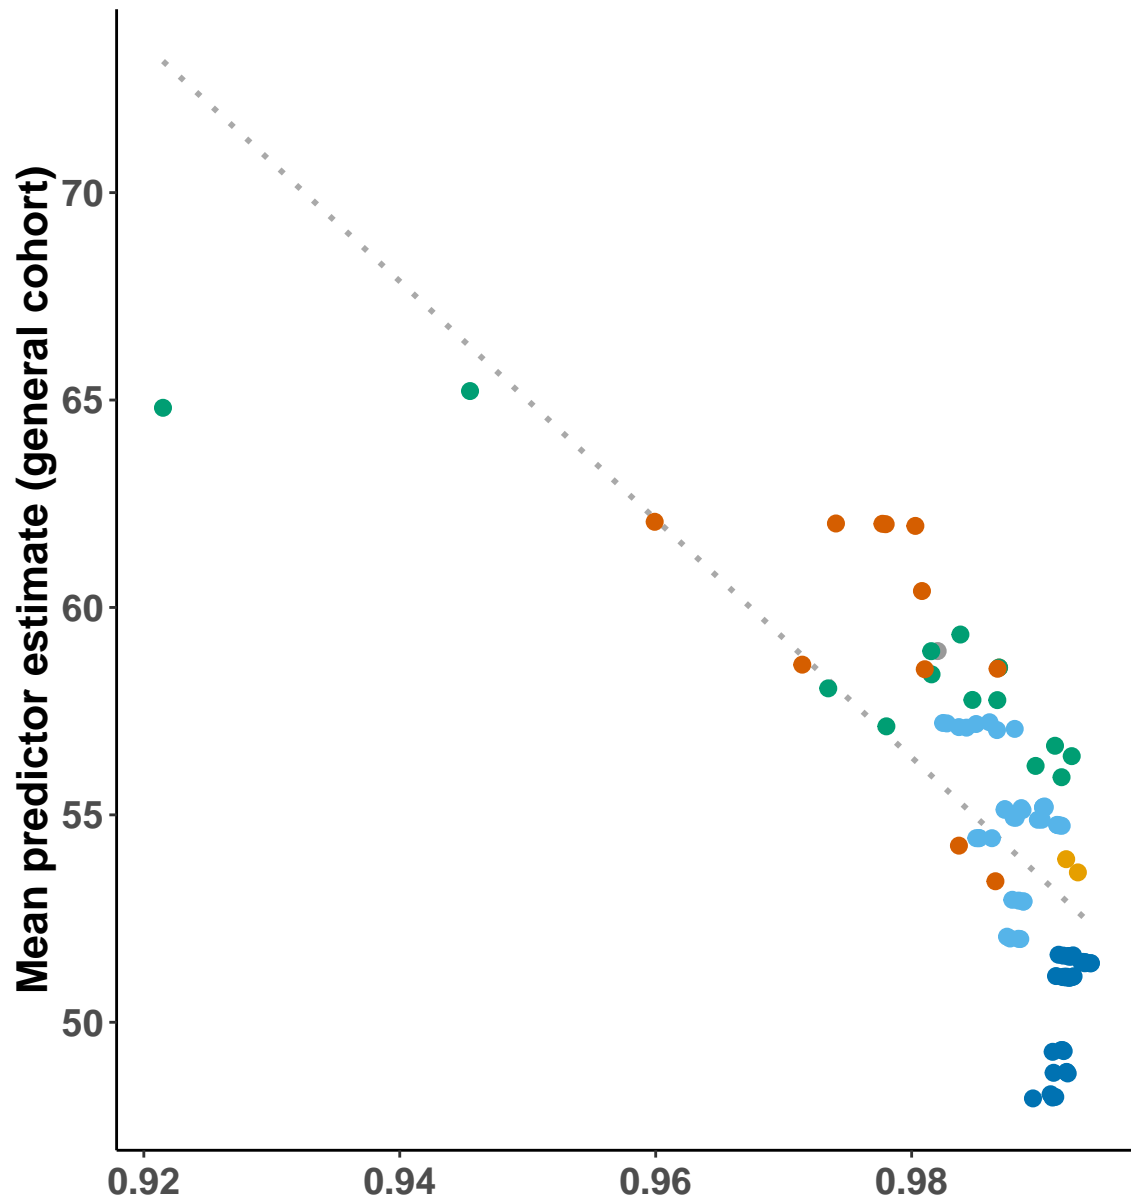

$\rho = 0.77$ ,  $P = 0e+00$

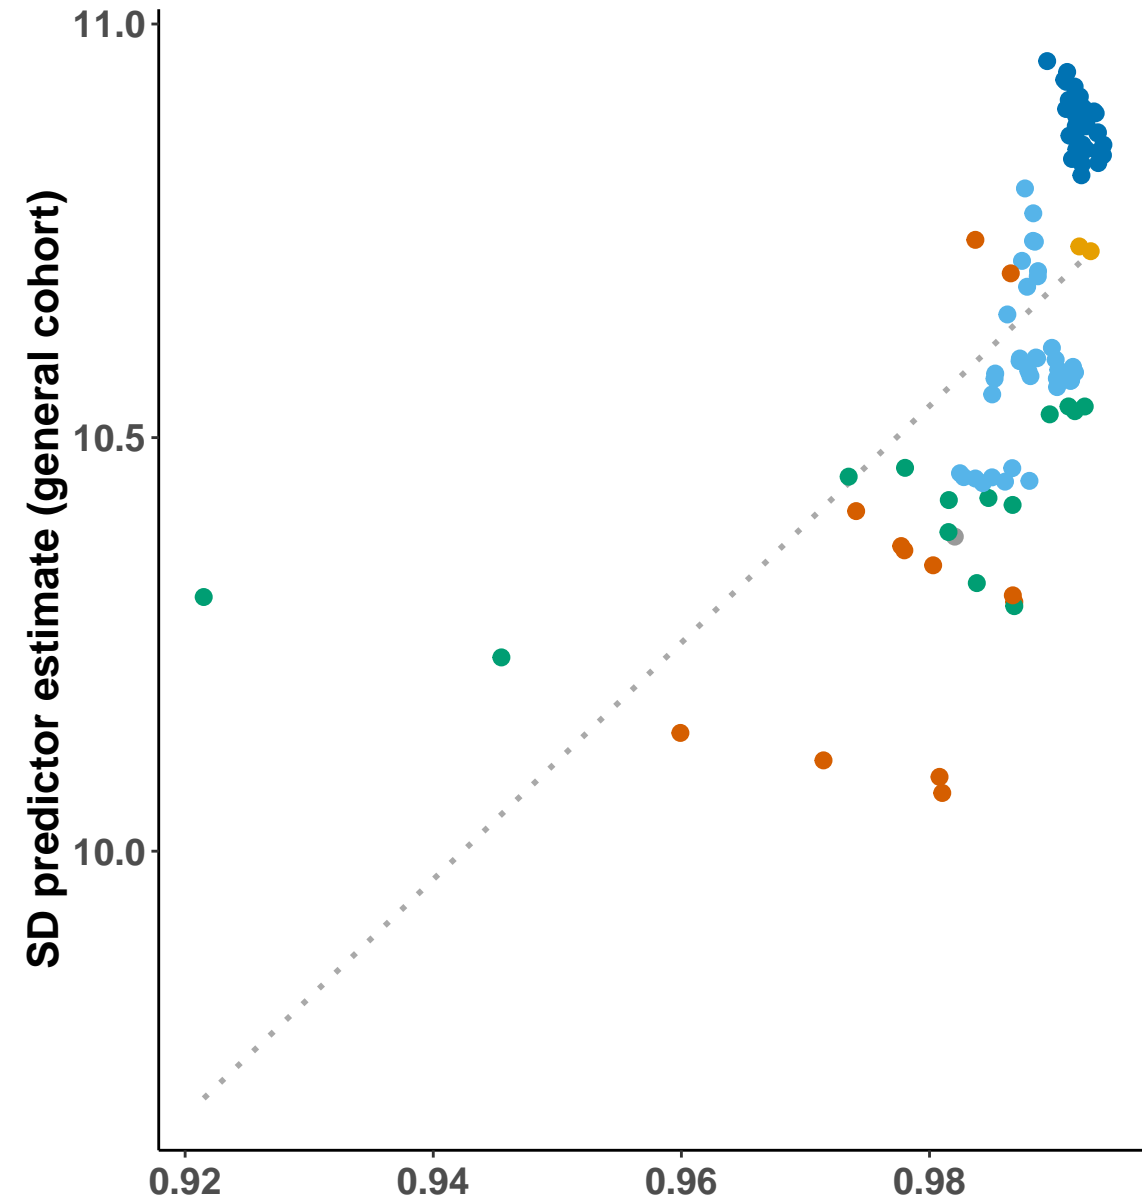

- Raw data
- ENmix\_RCP
- Minfi
- ENmix\_noRCP
- Hybrid
- Watermelon

- Raw data
- ENmix\_RCP
- Minfi
- ENmix\_noRCP
- Hybrid
- Watermelon



# BioAge4HAStatic

$\rho = -0.08$ ,  $P = 4.28e-01$

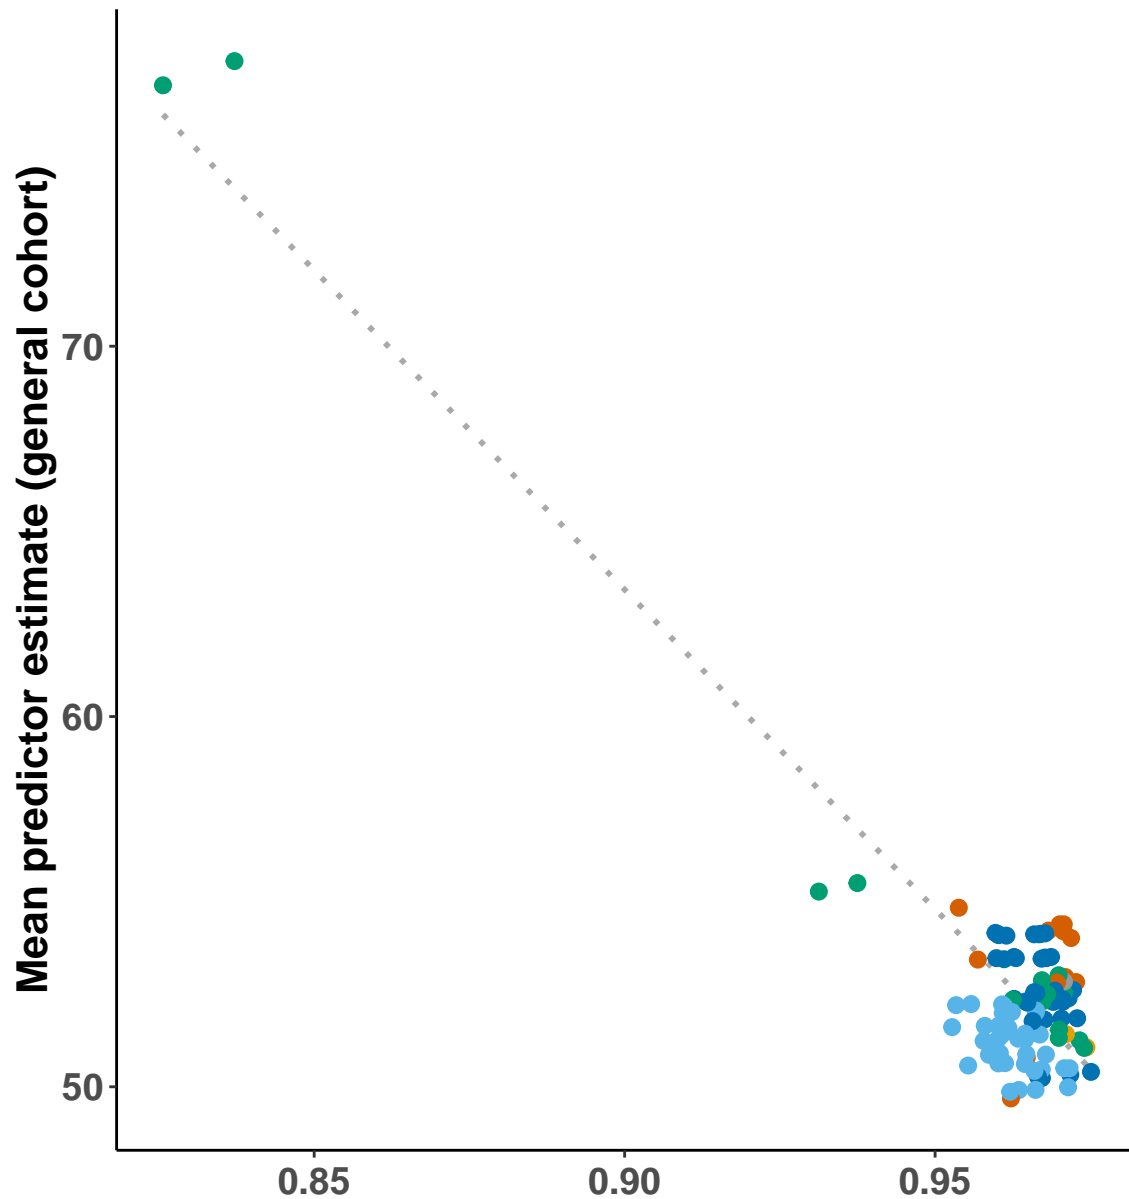

● Raw data    ● ENmix\_RCP    ● Minfi  
● ENmix\_noRCP    ● Hybrid    ● WaterRmelon

$\rho = 0.31$ ,  $P = 1.94e-03$

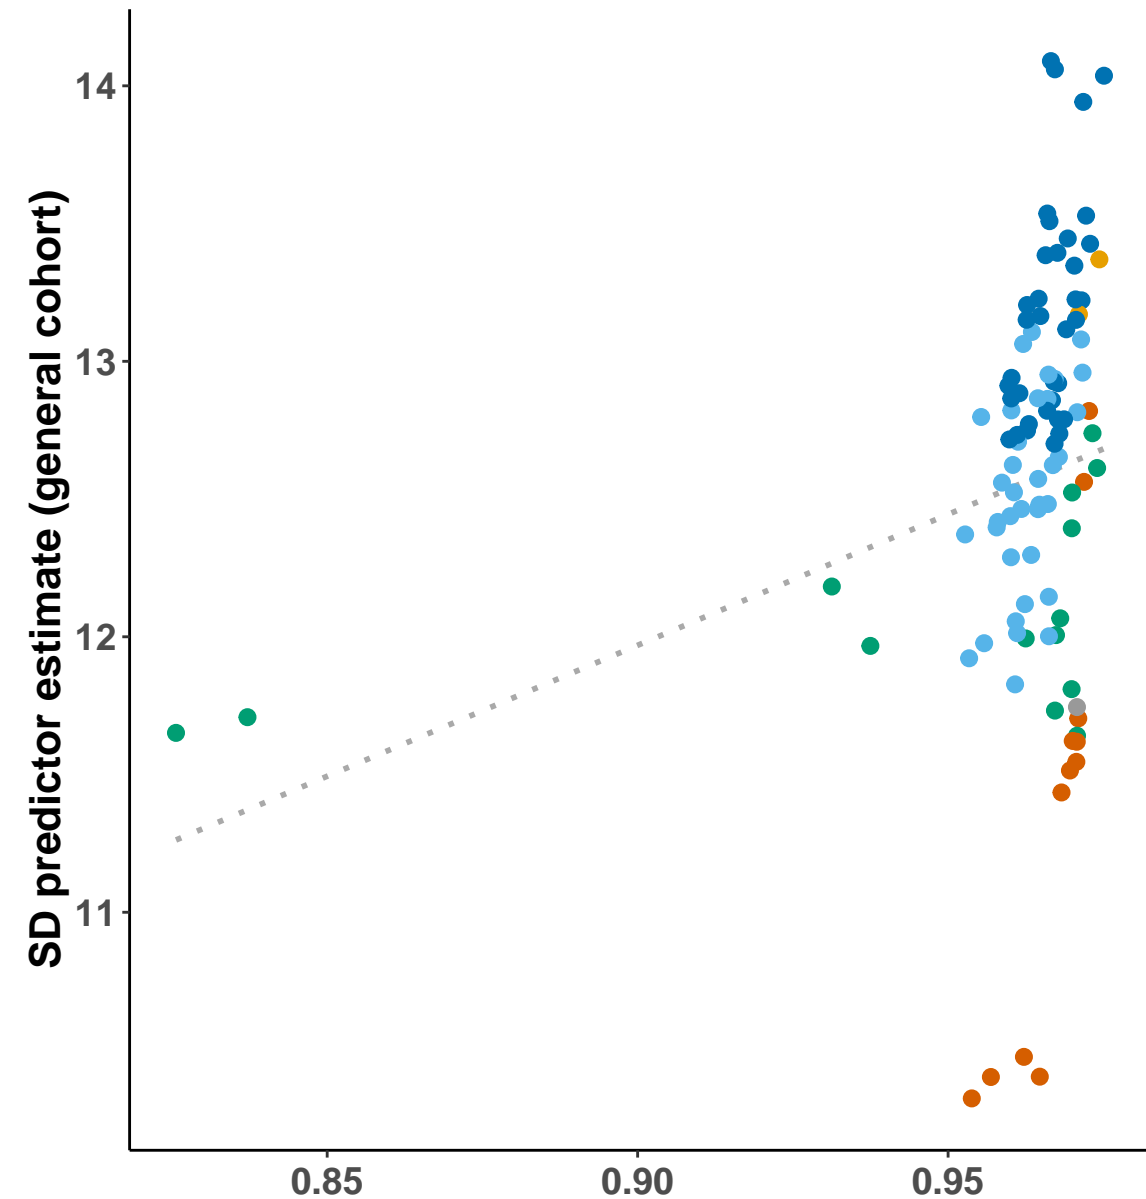

● Raw data    ● ENmix\_RCP    ● Minfi  
● ENmix\_noRCP    ● Hybrid    ● WaterRmelon
